# Supplementary material
Source: MDPI journal article supplement (https://www.mdpi.com/2076-3263/13/2/45)
Supplement: s1 [file s1]

Table S1: Basic heavy mineral count data. Gt-garnet, Zr-zircon, Sp-Sphene, Amp-calcic amphibole, Ep-epidote, Ap-apatite, Opx-orthopyroxene, Cpx-clinopyroxene, Ru-rutile, To-tourmaline, Spi-chrome-spinel, St-staurolite, Fl-fluorite, Id-iddingsite, Chl-chloritoid.

| Samples                  | Fm/Mb          | Suite | Cod e       | collected by      | Gt   | Zr   | Sp   | Amp  | Ep   | Ap   | Opx | Cpx | Ru   | To  | Spi | St  | Fl  | Id  | Top | Chl | Other | other+ | total |
|--------------------------|----------------|-------|-------------|-------------------|------|------|------|------|------|------|-----|-----|------|-----|-----|-----|-----|-----|-----|-----|-------|--------|-------|
| <b>B3 Elephant Trees</b> | Elephant Trees | L     | <b>Ms1</b>  | Uisdean Nicholson | 22.9 | 1.8  | 55.9 | 0.0  | 5.9  | 2.0  | 0.0 | 0.0 | 9.3  | 0.9 | 0.0 | 0.0 | 0.0 | 0.0 | 0.0 | 0.0 | 1.4   | 1.4    | 442   |
| <b>B4 Elephant Trees</b> | Elephant Trees | L     | <b>Ms2</b>  | Uisdean Nicholson | 18.6 | 1.0  | 57.8 | 0.0  | 5.8  | 2.9  | 0.0 | 0.0 | 12.0 | 1.0 | 0.0 | 0.0 | 0.0 | 0.0 | 0.0 | 0.0 | 1.0   | 1.0    | 415   |
| <b>B5 Lycium</b>         | Lycium         | L     | <b>Ly1</b>  | Uisdean Nicholson | 30.0 | 3.0  | 44.7 | 4.4  | 4.4  | 2.3  | 0.0 | 0.0 | 9.6  | 1.2 | 0.0 | 0.0 | 0.0 | 0.0 | 0.0 | 0.0 | 0.2   | 0.2    | 427   |
| <b>B6 Lycium</b>         | Lycium         | L     | <b>Ly2</b>  | Uisdean Nicholson | 19.6 | 3.3  | 50.7 | 0.0  | 6.1  | 0.5  | 0.0 | 0.0 | 18.7 | 0.7 | 0.0 | 0.0 | 0.0 | 0.0 | 0.0 | 0.0 | 0.5   | 0.5    | 428   |
| <b>B7 Lycium</b>         | Lycium         | L     | <b>Ly3</b>  | Uisdean Nicholson | 18.8 | 3.4  | 56.5 | 0.2  | 3.1  | 6.7  | 0.0 | 0.0 | 9.4  | 1.9 | 0.0 | 0.0 | 0.0 | 0.0 | 0.0 | 0.0 | 0.0   | 0.0    | 416   |
| <b>13-5 Wind Caves</b>   | Wind Caves     | L/C   | <b>Pw1</b>  | Uisdean Nicholson | 56.6 | 39.0 | 0.0  | 0.0  | 0.0  | 0.0  | 0.0 | 0.0 | 0.0  | 0.0 | 0.0 | 2.7 | 0.0 | 0.0 | 0.0 | 0.0 | 1.6   | 4.4    | 182   |
| <b>14-U5 Wind Caves</b>  | Wind Caves     | L/C   | <b>Pw2</b>  | Uisdean Nicholson | 21.6 | 14.7 | 25.2 | 11.6 | 12.8 | 9.0  | 0.0 | 0.0 | 1.3  | 1.9 | 0.0 | 1.1 | 0.0 | 0.0 | 0.0 | 0.0 | 0.8   | 1.9    | 476   |
| <b>14-U3 Wind Caves</b>  | Wind Caves     | L/C   | <b>Pw3</b>  | Uisdean Nicholson | 22.7 | 1.8  | 31.8 | 10.0 | 0.0  | 20.9 | 0.0 | 0.0 | 6.4  | 1.8 | 0.0 | 0.0 | 0.0 | 0.0 | 0.0 | 0.0 | 4.5   | 4.5    | 110   |
| <b>14-U2 Wind Caves</b>  | Wind Caves     | L/C   | <b>Pw4</b>  | Uisdean Nicholson | 23.8 | 3.3  | 22.1 | 14.8 | 0.0  | 27.9 | 0.0 | 0.0 | 6.6  | 1.6 | 0.0 | 0.0 | 0.0 | 0.0 | 0.0 | 0.0 | 0.0   | 0.0    | 122   |
| <b>16-2 Wind Caves</b>   | Wind Caves     | L/C   | <b>Pw5</b>  | Uisdean Nicholson | 32.4 | 4.2  | 38.1 | 4.7  | 4.5  | 2.0  | 0.0 | 0.2 | 12.6 | 0.0 | 0.0 | 0.0 | 0.0 | 0.0 | 0.0 | 0.0 | 1.2   | 1.5    | 404   |
| <b>17-2 Wind Caves</b>   | Wind Caves     | L/C   | <b>Pw6</b>  | Uisdean Nicholson | 28.3 | 2.9  | 45.8 | 3.6  | 0.7  | 11.5 | 0.2 | 0.5 | 3.4  | 1.2 | 0.0 | 0.0 | 0.0 | 0.0 | 0.0 | 0.0 | 1.9   | 2.6    | 417   |
| <b>17-3 Wind Caves</b>   | Wind Caves     | L/C   | <b>Pw7</b>  | Uisdean Nicholson | 20.5 | 1.4  | 64.2 | 1.7  | 2.8  | 5.2  | 0.0 | 0.7 | 2.8  | 0.3 | 0.0 | 0.0 | 0.0 | 0.0 | 0.0 | 0.0 | 0.3   | 1.0    | 288   |
| <b>17-4 Wind Caves</b>   | Wind Caves     | L/C   | <b>Pw8</b>  | Uisdean Nicholson | 26.8 | 16.4 | 25.9 | 0.5  | 14.3 | 11.6 | 0.0 | 0.2 | 0.7  | 3.1 | 0.0 | 0.0 | 0.0 | 0.0 | 0.0 | 0.0 | 0.5   | 0.7    | 421   |
| <b>17-7 Wind Caves</b>   | Wind Caves     | L/C   | <b>Pw9</b>  | Uisdean Nicholson | 32.0 | 10.5 | 26.0 | 1.8  | 11.3 | 12.3 | 0.0 | 0.3 | 1.0  | 2.0 | 0.0 | 0.0 | 0.0 | 0.0 | 0.0 | 0.0 | 3.0   | 3.3    | 400   |
| <b>17-9 Wind Caves</b>   | Wind Caves     | L/C   | <b>Pw10</b> | Uisdean Nicholson | 28.8 | 16.8 | 18.3 | 3.3  | 10.5 | 16.0 | 0.0 | 0.0 | 0.8  | 3.3 | 0.0 | 0.5 | 0.0 | 0.0 | 0.0 | 0.0 | 2.0   | 2.5    | 400   |
| <b>18-5a Wind Caves</b>  | Wind Caves     | L/C   | <b>Pw11</b> | Uisdean Nicholson | 33.6 | 14.4 | 18.9 | 2.1  | 15.5 | 12.6 | 0.0 | 0.2 | 0.5  | 1.8 | 0.0 | 0.2 | 0.0 | 0.0 | 0.0 | 0.0 | 0.2   | 0.7    | 438   |
| <b>18-6 Wind Caves</b>   | Wind Caves     | L/C   | <b>Pw12</b> | Uisdean Nicholson | 30.6 | 20.3 | 14.3 | 0.2  | 11.5 | 14.4 | 0.0 | 0.2 | 1.0  | 3.1 | 0.0 | 0.9 | 0.0 | 0.0 | 0.0 | 0.0 | 3.5   | 4.5    | 575   |
| <b>18-10 Wind Caves</b>  | Wind Caves     | L/C   | <b>Pw13</b> | Uisdean Nicholson | 29.7 | 13.3 | 17.7 | 0.8  | 20.0 | 13.3 | 0.0 | 0.0 | 0.6  | 3.3 | 0.0 | 0.6 | 0.0 | 0.0 | 0.0 | 0.0 | 0.6   | 1.2    | 481   |
| <b>18-11 Wind Caves</b>  | Wind Caves     | L/C   | <b>Pw14</b> | Uisdean Nicholson | 36.5 | 10.3 | 18.1 | 1.4  | 17.6 | 12.0 | 0.0 | 0.8 | 0.4  | 2.8 | 0.0 | 0.0 | 0.0 | 0.0 | 0.0 | 0.0 | 0.0   | 0.8    | 493   |
| <b>18-12 Wind Caves</b>  | Wind Caves     | L/C   | <b>Pw15</b> | Uisdean Nicholson | 31.1 | 8.6  | 22.7 | 1.2  | 18.0 | 10.6 | 0.2 | 0.2 | 1.2  | 4.2 | 0.0 | 0.0 | 0.0 | 0.0 | 0.0 | 0.0 | 1.7   | 2.2    | 405   |
| <b>18-15 Wind Caves</b>  | Wind Caves     | L/C   | <b>Pw16</b> | Uisdean Nicholson | 25.1 | 3.7  | 23.4 | 0.6  | 23.6 | 18.0 | 0.0 | 0.2 | 0.4  | 3.7 | 0.0 | 0.4 | 0.0 | 0.0 | 0.0 | 0.0 | 0.9   | 1.5    | 462   |
| <b>18-16 Wind Caves</b>  | Wind Caves     | L/C   | <b>Pw17</b> | Uisdean Nicholson | 31.6 | 10.4 | 18.9 | 0.0  | 20.3 | 11.8 | 0.0 | 0.2 | 0.9  | 5.2 | 0.2 | 0.0 | 0.0 | 0.0 | 0.0 | 0.0 | 0.5   | 0.9    | 557   |

|                          |              |     |       |                   |      |      |      |      |      |      |     |     |      |      |     |     |      |     |      |     |     |      |     |
|--------------------------|--------------|-----|-------|-------------------|------|------|------|------|------|------|-----|-----|------|------|-----|-----|------|-----|------|-----|-----|------|-----|
| 18-17 Wind Caves         | Wind Caves   | L/C | Pw1 8 | Uisdean Nicholson | 35.6 | 10.2 | 21.3 | 2.2  | 15.3 | 11.6 | 0.0 | 0.2 | 1.5  | 1.9  | 0.0 | 0.0 | 0.0  | 0.0 | 0.0  | 0.2 | 0.5 | 413  |     |
| 19-14 Wind Caves         | Wind Caves   | L/C | Pw1 9 | Uisdean Nicholson | 38.4 | 5.1  | 28.0 | 3.4  | 14.4 | 8.8  | 0.0 | 0.0 | 0.0  | 2.0  | 0.0 | 0.0 | 0.0  | 0.0 | 0.0  | 0.0 | 0.0 | 354  |     |
| 181011 Pw 1              | Wind Caves   | L/C | Pw2 0 | Paula McGill      | 49.5 | 24.0 | 3.0  | 0.0  | 7.5  | 6.5  | 0.0 | 0.0 | 0.5  | 4.0  | 0.0 | 0.0 | 0.5  | 0.0 | 0.5  | 0.0 | 4.0 | 5.0  | 200 |
| 181011 Pw 2              | Wind Caves   | L/C | Pw2 1 | Paula McGill      | 38.0 | 8.5  | 16.0 | 5.5  | 0.0  | 16.0 | 0.0 | 0.5 | 4.5  | 7.5  | 0.5 | 0.0 | 0.0  | 0.0 | 1.5  | 1.5 | 0.0 | 4.0  | 200 |
| 181011 Pw 3              | Wind Caves   | L/C | Pw2 2 | Paula McGill      | 34.5 | 22.5 | 7.0  | 2.5  | 7.0  | 10.0 | 0.0 | 0.5 | 0.0  | 6.5  | 0.0 | 0.0 | 0.0  | 0.0 | 8.5  | 0.0 | 1.0 | 10.0 | 200 |
| 221011 HM Pw #1          | Wind Caves   | L/C | Pw2 3 | Paula McGill      | 30.0 | 16.5 | 6.5  | 2.5  | 11.5 | 9.0  | 0.0 | 0.0 | 0.0  | 5.5  | 0.0 | 0.5 | 0.5  | 0.0 | 14.0 | 1.0 | 2.5 | 18.5 | 200 |
| 221011 HM Pw #2          | Wind Caves   | L/C | Pw2 4 | Paula McGill      | 40.5 | 16.0 | 8.5  | 2.5  | 1.0  | 16.0 | 0.0 | 0.0 | 1.5  | 9.0  | 0.0 | 0.0 | 0.0  | 0.0 | 0.0  | 0.0 | 5.0 | 5.0  | 200 |
|                          |              |     |       |                   |      |      |      |      |      |      |     |     |      |      |     |     |      |     |      |     |     | 0.0  |     |
| Mh5a Mud Hills           | Mud Hills    | C   | Pm1   | Uisdean Nicholson | 39.7 | 5.4  | 11.1 | 0.8  | 0.2  | 26.8 | 0.0 | 0.0 | 11.7 | 4.1  | 0.0 | 0.2 | 0.0  | 0.0 | 0.0  | 0.0 | 0.2 | 0.2  | 514 |
| Mh4b Mud Hills           | Mud Hills    | C   | Pm2   | Uisdean Nicholson | 50.7 | 30.3 | 5.0  | 0.0  | 0.6  | 8.5  | 0.0 | 0.0 | 2.5  | 2.3  | 0.0 | 0.2 | 0.0  | 0.0 | 0.0  | 0.0 | 0.0 | 0.2  | 519 |
| 221011 rhythmite sand #1 | Mud Hills    | C   | Pm3   | Paula McGill      | 32.5 | 11.0 | 8.0  | 2.5  | 1.0  | 21.5 | 0.0 | 1.0 | 1.0  | 8.0  | 0.0 | 1.0 | 10.0 | 0.0 | 0.0  | 0.5 | 2.0 | 14.5 | 200 |
| 221011 rhythmite sand #2 | Mud Hills    | C   | Pm4   | Paula McGill      | 45.0 | 18.5 | 10.0 | 2.0  | 0.5  | 17.5 | 0.0 | 0.0 | 0.0  | 5.0  | 0.0 | 0.0 | 0.0  | 0.0 | 0.5  | 1.0 | 0.0 | 1.5  | 200 |
| 221011 rhythmite sand #3 | Mud Hills    | C   | Pm5   | Paula McGill      | 31.5 | 7.0  | 9.5  | 2.5  | 0.5  | 36.0 | 0.0 | 0.0 | 1.0  | 6.0  | 0.0 | 2.0 | 0.0  | 0.0 | 0.0  | 1.0 | 3.0 | 6.0  | 200 |
| 221011 rhythmite sand #4 | Mud Hills    | C   | Pm6   | Paula McGill      | 35.0 | 8.5  | 11.5 | 3.5  | 1.0  | 26.0 | 0.0 | 0.0 | 0.5  | 10.5 | 0.0 | 1.0 | 1.5  | 0.0 | 0.0  | 1.0 | 0.0 | 3.5  | 200 |
| 221011 rhythmite sand #5 | Mud Hills    | C   | Pm7   | Paula McGill      | 25.5 | 4.5  | 11.0 | 30.5 | 10.0 | 7.5  | 0.5 | 2.0 | 1.0  | 6.0  | 0.0 | 0.0 | 0.5  | 0.0 | 1.0  | 0.0 | 0.0 | 4.0  | 200 |
| Yh 7 Yuha                | Yuha         | C   | Py1   | Uisdean Nicholson | 49.2 | 29.5 | 0.0  | 0.0  | 0.0  | 15.3 | 0.0 | 0.0 | 0.7  | 4.4  | 0.0 | 0.7 | 0.0  | 0.0 | 0.0  | 0.2 | 1.0 | 413  |     |
| Yh9 Yuha                 | Yuha         | C   | Py2   | Uisdean Nicholson | 33.5 | 29.9 | 19.0 | 0.4  | 2.8  | 9.3  | 0.0 | 0.0 | 1.1  | 2.8  | 0.0 | 0.9 | 0.0  | 0.0 | 0.0  | 0.2 | 1.1 | 462  |     |
| 291011 Py #1             | Yuha         | C   | Py3   | Paula McGill      | 46.5 | 25.0 | 0.0  | 0.0  | 0.5  | 20.0 | 0.0 | 0.0 | 1.5  | 4.5  | 0.0 | 1.0 | 0.0  | 0.0 | 1.0  | 0.0 | 2.0 | 200  |     |
| 031111 Py #4             | Yuha         | C   | Py4   | Paula McGill      | 55.0 | 18.0 | 0.5  | 1.0  | 2.5  | 18.0 | 0.0 | 0.0 | 1.0  | 3.5  | 0.0 | 0.0 | 0.0  | 0.0 | 0.5  | 0.0 | 0.5 | 200  |     |
| Ch10 Camel's Head        | Camel's Head | C   | PCh 1 | Uisdean Nicholson | 24.7 | 11.4 | 30.9 | 8.2  | 14.1 | 6.0  | 0.0 | 0.0 | 0.4  | 3.6  | 0.0 | 0.0 | 0.0  | 0.0 | 0.0  | 0.8 | 0.8 | 502  |     |
| Ch12 Camel's Head        | Camel's Head | C   | PCh 2 | Uisdean Nicholson | 29.5 | 8.9  | 13.6 | 0.0  | 18.1 | 18.6 | 0.0 | 0.0 | 1.0  | 5.5  | 0.0 | 1.2 | 0.0  | 0.0 | 0.0  | 3.5 | 4.7 | 403  |     |
| 221011 Pch sand #5       | Camel's Head | C   | PCh 3 | Paula McGill      | 38.0 | 35.0 | 4.5  | 1.5  | 5.0  | 5.0  | 0.0 | 0.5 | 1.5  | 2.0  | 0.5 | 1.0 | 0.0  | 0.0 | 5.0  | 0.0 | 0.5 | 7.5  | 200 |
| 221011 Pch sand #7       | Camel's Head | C   | PCh 4 | Paula McGill      | 35.5 | 16.0 | 14.0 | 2.5  | 13.5 | 6.5  | 0.0 | 0.0 | 2.0  | 2.5  | 0.0 | 0.0 | 0.0  | 0.0 | 7.0  | 0.5 | 0.0 | 7.5  | 200 |
|                          |              |     |       |                   |      |      |      |      |      |      |     |     |      |      |     |     |      |     |      |     |     | 0.0  |     |

|                            |               |     |             |                   |      |      |      |      |      |      |     |      |     |      |     |     |     |     |      |     |      |      |     |
|----------------------------|---------------|-----|-------------|-------------------|------|------|------|------|------|------|-----|------|-----|------|-----|-----|-----|-----|------|-----|------|------|-----|
| <b>Db 13 Arroyo Diablo</b> | Arroyo Diablo | C   | <b>Pd1</b>  | Uisdean Nicholson | 35.8 | 24.8 | 11.9 | 2.5  | 12.3 | 7.9  | 0.0 | 0.0  | 1.6 | 2.5  | 0.6 | 0.0 | 0.0 | 0.0 | 0.0  | 0.0 | 0.0  | 0.6  | 318 |
| <b>Db14 Arroyo Diablo</b>  | Arroyo Diablo | C   | <b>Pd2</b>  | Uisdean Nicholson | 10.9 | 4.7  | 6.9  | 51.9 | 9.1  | 6.4  | 0.0 | 8.6  | 0.0 | 1.5  | 0.0 | 0.0 | 0.0 | 0.0 | 0.0  | 0.0 | 0.0  | 8.6  | 405 |
| <b>221011 Pd #10</b>       | Arroyo Diablo | C   | <b>Pd3</b>  | Paula McGill      | 40.5 | 7.0  | 9.0  | 12.5 | 15.5 | 7.0  | 0.0 | 1.0  | 0.0 | 4.0  | 0.0 | 0.0 | 0.0 | 0.0 | 0.5  | 0.0 | 3.0  | 4.5  | 200 |
| <b>221011 Pd #12</b>       | Arroyo Diablo | C   | <b>Pd4</b>  | Paula McGill      | 30.5 | 15.0 | 10.0 | 3.0  | 11.0 | 23.5 | 0.0 | 0.0  | 1.0 | 3.5  | 0.0 | 1.0 | 1.5 | 0.0 | 0.0  | 0.0 | 0.0  | 2.5  | 200 |
| <b>281011 d #4</b>         | Arroyo Diablo | C   | <b>Pd5</b>  | Paula McGill      | 18.5 | 7.5  | 3.0  | 33.0 | 6.5  | 18.5 | 1.5 | 2.5  | 1.5 | 2.5  | 0.0 | 0.5 | 0.5 | 0.0 | 0.0  | 0.0 | 4.0  | 9.0  | 200 |
| <b>301011 Pd #1</b>        | Arroyo Diablo | C   | <b>Pd6</b>  | Paula McGill      | 31.5 | 25.0 | 5.5  | 10.5 | 15.5 | 6.0  | 0.0 | 0.0  | 0.0 | 4.0  | 0.5 | 0.0 | 1.5 | 0.0 | 0.0  | 0.0 | 0.0  | 2.0  | 200 |
| <b>26-1a Olla</b>          | Olla          | C/L | <b>Po1</b>  | Uisdean Nicholson | 15.3 | 2.6  | 8.7  | 19.9 | 23.1 | 20.3 | 0.0 | 6.1  | 0.0 | 3.3  | 0.0 | 0.4 | 0.0 | 0.0 | 0.0  | 0.0 | 0.2  | 6.8  | 458 |
| <b>26-1b? Olla</b>         | Olla          | C/L | <b>Po2</b>  | Uisdean Nicholson | 2.5  | 18.1 | 4.7  | 40.4 | 28.9 | 1.2  | 0.5 | 0.2  | 0.7 | 0.5  | 0.0 | 0.7 | 0.0 | 0.0 | 0.0  | 0.0 | 1.5  | 2.9  | 408 |
| <b>26-3 Olla</b>           | Olla          | C/L | <b>Po3</b>  | Uisdean Nicholson | 22.8 | 3.2  | 15.8 | 28.4 | 7.4  | 5.9  | 0.5 | 11.7 | 1.1 | 0.5  | 0.0 | 0.2 | 0.0 | 0.0 | 0.0  | 0.0 | 2.5  | 14.9 | 443 |
| <b>25-9a Olla</b>          | Olla          | C/L | <b>Po4</b>  | Uisdean Nicholson | 19.5 | 1.0  | 5.7  | 62.3 | 0.0  | 6.0  | 0.0 | 0.0  | 0.7 | 2.5  | 0.0 | 0.0 | 0.0 | 0.0 | 0.0  | 0.0 | 2.2  | 2.2  | 401 |
| <b>25-9b Olla</b>          | Olla          | C/L | <b>Po5</b>  | Uisdean Nicholson | 19.9 | 8.0  | 9.5  | 31.6 | 14.2 | 7.7  | 0.0 | 1.7  | 0.2 | 3.7  | 0.0 | 0.5 | 0.0 | 0.0 | 0.0  | 0.0 | 3.0  | 5.2  | 402 |
| <b>191011 Log 4 #1</b>     | Olla          | C   | <b>Po6</b>  | Paula McGill      | 25.0 | 11.5 | 7.0  | 33.0 | 7.5  | 4.5  | 0.0 | 1.5  | 1.0 | 3.5  | 0.0 | 1.0 | 0.0 | 0.0 | 0.0  | 0.5 | 4.0  | 7.0  | 200 |
| <b>191011 Log 4 #3</b>     | Olla          | L   | <b>Po7</b>  | Paula McGill      | 31.5 | 7.0  | 2.5  | 1.5  | 0.0  | 11.5 | 0.0 | 6.0  | 1.5 | 11.0 | 0.0 | 0.0 | 0.0 | 0.0 | 20.5 | 0.0 | 7.0  | 33.5 | 200 |
| <b>191011 Log 4 #4</b>     | Olla          | L   | <b>Po8</b>  | Paula McGill      | 13.5 | 3.5  | 3.0  | 1.0  | 0.5  | 6.0  | 0.0 | 1.0  | 0.5 | 7.0  | 0.0 | 0.0 | 0.0 | 0.0 | 64.0 | 0.0 | 0.0  | 65.0 | 200 |
| <b>191011 Log 4 #6</b>     | Olla          | C   | <b>Po9</b>  | Paula McGill      | 26.5 | 23.5 | 10.5 | 4.0  | 11.0 | 13.0 | 0.0 | 1.5  | 0.5 | 3.5  | 0.5 | 0.5 | 0.5 | 0.0 | 1.5  | 1.0 | 2.0  | 7.5  | 200 |
| <b>201011 Log 9 #1</b>     | Olla          | C   | <b>Po10</b> | Paula McGill      | 23.5 | 15.5 | 6.5  | 23.5 | 15.5 | 8.0  | 1.0 | 0.0  | 0.5 | 5.5  | 0.0 | 0.0 | 0.0 | 0.0 | 0.0  | 0.0 | 0.5  | 1.5  | 200 |
| <b>201011 Log 9 #2</b>     | Olla          | C   | <b>Po11</b> | Paula McGill      | 28.5 | 20.0 | 3.5  | 23.5 | 13.5 | 4.5  | 0.0 | 1.0  | 1.0 | 1.5  | 0.0 | 0.0 | 0.0 | 0.0 | 0.0  | 0.0 | 3.0  | 4.0  | 200 |
| <b>201011 Log 9 #5</b>     | Olla          | L   | <b>Po12</b> | Paula McGill      | 42.9 | 11.1 | 11.1 | 1.6  | 0.0  | 7.9  | 0.0 | 6.3  | 0.0 | 6.3  | 0.0 | 0.0 | 6.3 | 0.0 | 0.0  | 0.0 | 6.3  | 19.0 | 63  |
| <b>201011 Log 9 #6</b>     | Olla          | C   | <b>Po13</b> | Paula McGill      | 25.5 | 13.5 | 5.5  | 5.0  | 17.5 | 23.5 | 0.0 | 0.0  | 1.0 | 6.5  | 0.0 | 0.0 | 0.0 | 0.0 | 0.0  | 0.5 | 1.5  | 2.0  | 200 |
| <b>211011 Log 15 #1</b>    | Olla          | L   | <b>Po14</b> | Paula McGill      | 9.5  | 0.5  | 3.0  | 66.0 | 3.5  | 3.0  | 5.0 | 5.5  | 0.0 | 4.0  | 0.0 | 0.0 | 0.0 | 0.0 | 0.0  | 0.0 | 0.0  | 10.5 | 200 |
| <b>211011 Log 15 #2</b>    | Olla          | C   | <b>Po15</b> | Paula McGill      | 20.0 | 13.0 | 5.0  | 36.5 | 5.0  | 6.5  | 0.0 | 1.5  | 1.0 | 4.0  | 0.0 | 0.0 | 1.0 | 0.0 | 0.0  | 0.0 | 6.5  | 9.0  | 200 |
| <b>211011 Log 15 #4</b>    | Olla          | L   | <b>Po16</b> | Paula McGill      | 46.0 | 3.0  | 4.0  | 23.5 | 3.0  | 4.5  | 0.5 | 3.0  | 2.5 | 6.0  | 0.0 | 0.0 | 0.0 | 0.0 | 4.0  | 0.0 | 0.0  | 7.5  | 200 |
| <b>211011 Log 15 #6</b>    | Olla          | L   | <b>Po17</b> | Paula McGill      | 47.5 | 2.0  | 8.0  | 22.5 | 3.0  | 0.0  | 1.0 | 4.0  | 3.5 | 4.5  | 0.0 | 0.0 | 1.0 | 0.0 | 3.0  | 0.0 | 0.0  | 9.0  | 200 |
| <b>211011 Log 15 #7</b>    | Olla          | C   | <b>Po18</b> | Paula McGill      | 6.5  | 4.5  | 1.5  | 62.5 | 14.5 | 3.5  | 0.0 | 5.5  | 0.0 | 1.5  | 0.0 | 0.0 | 0.0 | 0.0 | 0.0  | 0.0 | 0.0  | 5.5  | 200 |
| <b>231011 Log 18 #13</b>   | Olla          | C   | <b>Po19</b> | Paula McGill      | 23.0 | 14.0 | 5.0  | 30.0 | 4.0  | 5.5  | 0.0 | 2.5  | 0.0 | 3.0  | 0.5 | 0.5 | 0.0 | 0.0 | 0.0  | 0.5 | 11.5 | 15.5 | 200 |

|                          |                 |     |              |                   |      |      |      |      |      |      |     |      |     |      |     |     |     |     |     |     |     |      |     |
|--------------------------|-----------------|-----|--------------|-------------------|------|------|------|------|------|------|-----|------|-----|------|-----|-----|-----|-----|-----|-----|-----|------|-----|
| <b>231011 Log 18 #14</b> | Olla            | C/L | <b>Po2 0</b> | Paula McGill      | 20.0 | 2.5  | 2.0  | 54.5 | 3.0  | 3.5  | 0.5 | 4.5  | 1.0 | 3.5  | 0.0 | 0.5 | 0.0 | 0.0 | 3.0 | 1.0 | 0.5 | 10.0 | 200 |
| <b>231011 Log 18 #15</b> | Olla            | C   | <b>Po2 1</b> | Paula McGill      | 39.0 | 3.0  | 1.0  | 26.0 | 5.0  | 8.0  | 0.5 | 6.5  | 0.5 | 8.5  | 0.0 | 0.0 | 0.0 | 0.0 | 0.0 | 0.0 | 2.0 | 9.0  | 200 |
| <b>231011 Log 18 #16</b> | Olla            | C/L | <b>Po2 2</b> | Paula McGill      | 27.5 | 17.5 | 5.0  | 23.5 | 13.5 | 4.0  | 0.5 | 2.5  | 0.0 | 4.5  | 0.0 | 0.0 | 0.0 | 0.0 | 0.0 | 0.5 | 1.0 | 4.5  | 200 |
| <b>231011 Log 19 #17</b> | Olla            | C   | <b>Po2 3</b> | Paula McGill      | 18.5 | 16.5 | 2.0  | 30.5 | 14.0 | 5.0  | 0.0 | 8.0  | 0.0 | 4.0  | 0.0 | 0.0 | 0.0 | 0.0 | 1.0 | 0.5 | 0.0 | 9.5  | 200 |
| <b>231011 Log 19 #18</b> | Olla            | C/L | <b>Po2 4</b> | Paula McGill      | 30.5 | 5.0  | 3.0  | 40.0 | 1.5  | 6.5  | 1.0 | 3.5  | 2.5 | 6.5  | 0.0 | 0.0 | 0.0 | 0.0 | 0.0 | 0.0 | 0.0 | 4.5  | 200 |
| <b>231011 Log 19 #20</b> | Olla            | L   | <b>Po2 5</b> | Paula McGill      | 33.0 | 2.5  | 2.5  | 24.0 | 0.0  | 3.0  | 3.0 | 13.5 | 2.0 | 13.5 | 0.0 | 0.0 | 0.0 | 0.0 | 0.5 | 0.0 | 2.5 | 19.5 | 200 |
| <b>231011 Log 19 #22</b> | Olla            | C/L | <b>Po2 6</b> | Paula McGill      | 38.5 | 3.0  | 3.0  | 24.5 | 0.0  | 8.5  | 0.0 | 13.5 | 1.5 | 7.5  | 0.0 | 0.0 | 0.0 | 0.0 | 0.0 | 0.0 | 0.0 | 13.5 | 200 |
| <b>251011 Log 23 #1</b>  | Olla            | C/L | <b>Po2 7</b> | Paula McGill      | 26.5 | 17.0 | 5.5  | 28.0 | 6.5  | 3.5  | 1.5 | 7.5  | 1.0 | 2.0  | 0.0 | 0.0 | 0.0 | 0.0 | 0.0 | 0.0 | 1.0 | 10.0 | 200 |
| <b>261011 Log 24 #1</b>  | Olla            | C   | <b>Po2 8</b> | Paula McGill      | 44.5 | 3.0  | 7.5  | 19.5 | 1.0  | 3.5  | 1.5 | 5.5  | 3.0 | 9.0  | 0.0 | 0.0 | 0.0 | 0.0 | 0.5 | 0.0 | 1.5 | 9.0  | 200 |
| <b>261011 Log 24 #2</b>  | Olla            | C/L | <b>Po2 9</b> | Paula McGill      | 30.5 | 2.5  | 7.0  | 36.0 | 0.5  | 4.5  | 2.0 | 8.5  | 3.5 | 5.0  | 0.0 | 0.0 | 0.0 | 0.0 | 0.0 | 0.0 | 0.0 | 10.5 | 200 |
| <b>261011 Log 25 #3</b>  | Olla            | C   | <b>Po3 0</b> | Paula McGill      | 22.5 | 10.5 | 5.5  | 26.5 | 9.0  | 12.0 | 0.0 | 3.0  | 0.5 | 4.0  | 0.0 | 0.0 | 0.0 | 0.0 | 0.0 | 0.0 | 6.5 | 9.5  | 200 |
| <b>261011 Log 25 #4</b>  | Olla            | C/L | <b>Po3 1</b> | Paula McGill      | 38.5 | 3.5  | 6.0  | 28.5 | 3.5  | 8.5  | 2.5 | 3.0  | 1.5 | 4.0  | 0.0 | 0.0 | 0.5 | 0.0 | 0.0 | 0.0 | 0.0 | 6.0  | 200 |
| <b>261011 Log 25 #5</b>  | Olla            | L   | <b>Po3 2</b> | Paula McGill      | 45.5 | 3.5  | 6.5  | 19.0 | 3.5  | 1.5  | 6.0 | 4.0  | 3.0 | 5.5  | 0.0 | 0.0 | 0.0 | 0.0 | 1.5 | 0.5 | 0.0 | 12.0 | 200 |
| <b>301011 Po #1</b>      | Olla            | C/L | <b>Po3 3</b> | Paula McGill      | 14.0 | 8.5  | 5.0  | 45.0 | 11.5 | 8.5  | 0.0 | 3.5  | 1.0 | 3.0  | 0.0 | 0.0 | 0.0 | 0.0 | 0.0 | 0.0 | 0.0 | 3.5  | 200 |
| <b>031111 Po #2</b>      | Olla            | C/L | <b>Po3 4</b> | Paula McGill      | 21.0 | 21.5 | 3.0  | 29.5 | 12.0 | 7.0  | 0.5 | 0.0  | 0.5 | 4.5  | 0.0 | 0.5 | 0.0 | 0.0 | 0.0 | 0.0 | 0.0 | 1.0  | 200 |
| <b>Hu17 Hueso</b>        | Hueso           | L   | <b>QPh</b>   | Uisdean Nicholson | 22.9 | 3.0  | 7.8  | 50.5 | 2.2  | 7.3  | 0.0 | 0.0  | 3.2 | 2.8  | 0.0 | 0.0 | 0.0 | 0.0 | 0.0 | 0.0 | 0.2 | 0.2  | 463 |
| <b>CC16 Canebrake</b>    | Canebrake       | L   | <b>QPc 1</b> | Uisdean Nicholson | 29.2 | 2.4  | 11.5 | 38.8 | 1.6  | 7.3  | 0.0 | 0.0  | 3.3 | 5.2  | 0.0 | 0.0 | 0.0 | 0.0 | 0.0 | 0.0 | 0.7 | 0.7  | 425 |
| <b>281011 Cb #1</b>      | Canebrake       | L   | <b>QPc 2</b> | Paula McGill      | 47.0 | 5.0  | 10.0 | 19.0 | 1.5  | 7.5  | 0.0 | 0.0  | 3.5 | 3.5  | 0.0 | 0.0 | 2.5 | 0.0 | 0.0 | 0.0 | 0.5 | 3.0  | 200 |
| <b>281011 Cb #2</b>      | Canebrake       | L   | <b>QPc 3</b> | Paula McGill      | 46.0 | 4.0  | 3.5  | 29.5 | 1.0  | 9.0  | 1.0 | 0.5  | 2.5 | 1.5  | 0.5 | 0.0 | 0.0 | 0.0 | 0.0 | 0.5 | 0.5 | 3.0  | 200 |
|                          |                 |     |              |                   |      |      |      |      |      |      |     |      |     |      |     |     |     |     |     |     |     | 0.0  |     |
| <b>CR20</b>              | modern Colorado | C   | <b>Col 1</b> | Uisdean Nicholson | 11.4 | 14.4 | 2.3  | 19.2 | 7.8  | 9.2  | 1.8 | 25.9 | 0.5 | 6.9  | 0.0 | 0.7 | 0.0 | 0.0 | 0.0 | 0.0 | 0.0 | 28.4 | 437 |
| <b>CR22</b>              | modern Colorado | C   | <b>Col 2</b> | Uisdean Nicholson | 5.1  | 7.5  | 2.2  | 29.4 | 6.0  | 8.2  | 1.6 | 31.8 | 0.9 | 5.7  | 0.0 | 0.0 | 0.0 | 0.0 | 0.0 | 0.0 | 1.5 | 34.9 | 547 |
| <b>CR23</b>              | modern Colorado | C   | <b>Col 3</b> | Uisdean Nicholson | 7.4  | 6.4  | 7.9  | 34.9 | 4.8  | 4.8  | 2.7 | 25.6 | 1.2 | 3.9  | 0.0 | 0.2 | 0.0 | 0.0 | 0.0 | 0.0 | 0.2 | 28.7 | 484 |

Table S2: Stable heavy mineral ratio data. ATi-apatite:tourmaline index, GZi-garnet:zircon index, RuZi,-rutile:zircon index.

| <b>Sample</b>                      |               | <b>ATi</b> | <b>GZi</b> | <b>RuZi</b> |
|------------------------------------|---------------|------------|------------|-------------|
| <b>191011 Log 4 #1</b>             | Olla          | 54.3       | 69.2       | 2.9         |
| <b>191011 Log 4 #6</b>             | Olla          | 78.4       | 52.4       | 2.9         |
| <b>201011 Log 9 #1</b>             | Olla          | 70.4       | 61.3       | 2.9         |
| <b>201011 Log 9 #2</b>             | Olla          | 67.6       | 59.9       | 6.5         |
| <b>201011 Log 9 #6</b>             | Olla          | 80.6       | 76.0       | 11.5        |
| <b>211011 Log 15 #2</b>            | Olla          | 56.2       | 61.5       | 5.7         |
| <b>211011 Log 15 #7</b>            | Olla          | 48.5       | 64.5       | 2.9         |
| <b>231011 Log 18 #13</b>           | Olla          | 61.1       | 60.4       | 0.0         |
| <b>231011 Log 18 #15</b>           | Olla          | 50.3       | 95.2       | 52.4        |
| <b>231011 Log 19 #17</b>           | Olla          | 54.8       | 59.3       | 0.6         |
| <b>261011 Log 24 #1</b>            | Olla          | 35.7       | 95.2       | 36.4        |
| <b>261011 Log 25 #3</b>            | Olla          | 74.6       | 67.6       | 7.4         |
| <b>281011 Log 27 #1</b>            | Olla          | 64.1       | 47.4       | 0.5         |
| <b>191011 Log 4 #3</b>             | Olla          | 45.7       | 79.4       | 20.0        |
| <b>191011 Log 4 #4</b>             | Olla          | 58.2       | 79.4       | 15.0        |
| <b>201011 Log 9 #5</b>             | Olla          | 55.6       | 79.4       | 0.0         |
| <b>211011 Log 15 #1</b>            | Olla          | 45.7       | 92.6       | 35.5        |
| <b>211011 Log 15 #4</b>            | Olla          | 33.3       | 94.3       | 34.2        |
| <b>211011 Log 15 #6</b>            | Olla          | 24.8       | 93.9       | 30.8        |
| <b>231011 Log 19 #20</b>           | Olla          | 28.1       | 94.8       | 32.5        |
| <b>261011 Log 25 #5</b>            | Olla          | 41.9       | 92.2       | 36.1        |
| <b>231011 Log 18 #14</b>           | Olla          | 64.5       | 90.1       | 28.3        |
| <b>231011 Log 18 #16</b>           | Olla          | 49.4       | 55.9       | 1.0         |
| <b>231011 Log 19 #18</b>           | Olla          | 33.3       | 87.0       | 25.4        |
| <b>231011 Log 20 #22</b>           | Olla          | 55.6       | 92.6       | 33.3        |
| <b>251011 Log 23 #1</b>            | Olla          | 56.8       | 66.9       | 6.5         |
| <b>261011 Log 24 #2</b>            | Olla          | 44.1       | 94.8       | 41.9        |
| <b>261011 Log 25 #4</b>            | Olla          | 63.5       | 91.7       | 22.6        |
| <b>301011 Po #1 undefined Olla</b> | Olla          | 62.1       | 65.6       | 2.9         |
| <b>031111 Po #2 undefined Olla</b> | Olla          | 62.9       | 56.7       | 2.9         |
| <b>25-8b und. Olla</b>             | Olla          | 42.6       | 98.0       | 92.3        |
| <b>25-8c und. Olla</b>             | Olla          | 57.6       | 98.6       | 75.0        |
| <b>25-9a und. Olla</b>             | Olla          | 70.6       | 95.1       | 42.9        |
| <b>25-9b und. Olla</b>             | Olla          | 67.4       | 71.4       | 3.0         |
| <b>26-1a und. Olla</b>             | Olla          | 86.1       | 85.4       | 0.0         |
| <b>26-1b und. Olla</b>             | Olla          | 71.4       | 11.9       | 3.9         |
| <b>26_3 und. Olla</b>              | Olla          | 69.9       | 88.1       | 11.9        |
| <b>221011 Pd #10</b>               | Arroyo Diablo | 62.5       | 81.0       | 2.9         |
| <b>221011 Pd #12</b>               | Arroyo Diablo | 80.6       | 73.5       | 6.2         |
| <b>281011 d #4</b>                 | Arroyo Diablo | 83.5       | 65.4       | 11.7        |
| <b>301011 Pd #1</b>                | Arroyo Diablo | 64.2       | 51.0       | 1.2         |
| <b>Db13</b>                        | Arroyo Diablo | 81.5       | 88.4       | 15.8        |
| <b>Db14</b>                        | Arroyo Diablo | 81.3       | 68.1       | 4.5         |

| <b>Sample</b>             |                | <b>ATi</b> | <b>GZi</b> | <b>RuZi</b> |
|---------------------------|----------------|------------|------------|-------------|
| <b>221011 Pch sand #5</b> | Camel's Head   | 78.1       | 50.6       | 2.0         |
| <b>221011 Pch sand #7</b> | Camel's Head   | 79.3       | 66.9       | 3.8         |
| <b>Ch10</b>               | Camel's Head   | 69.9       | 68.0       | 3.7         |
| <b>Ch11</b>               | Camel's Head   | 81.5       | 88.4       | 15.8        |
| <b>Db12 Pch</b>           | Camel's Head   | 77.3       | 76.8       | 10.0        |
| <b>281011 Cb #1</b>       | Canebrake      | 84.3       | 90.1       | 48.3        |
| <b>281011 Cb #2</b>       | Canebrake      | 84.7       | 91.7       | 48.0        |
| <b>CC16 Cb</b>            | Canebrake      | 61.1       | 90.6       | 41.5        |
| <b>CR20</b>               | Colorado River | 64.6       | 44.2       | 4.5         |
| <b>CR22</b>               | Colorado River | 60.1       | 42.9       | 7.1         |
| <b>CR23</b>               | Colorado River | 65.4       | 51.1       | 10.4        |
| <b>B1</b>                 | Alverson       | 77.1       | 90.9       | 71.4        |
| <b>B2</b>                 | Alverson       | 80.0       | 96.1       | 82.8        |
| <b>B3</b>                 | Elephant Trees | 69.2       | 92.7       | 83.7        |
| <b>B4</b>                 | Elephant Trees | 75.0       | 95.1       | 92.6        |
| <b>B5</b>                 | Lycium         | 66.7       | 90.8       | 75.9        |
| <b>B6</b>                 | Lycium         | 40.0       | 85.7       | 85.1        |
| <b>B7</b>                 | Lycium         | 77.8       | 84.8       | 73.6        |
| <b>WC 2</b>               | U. Megabreccia | 0.0        | 23.1       | 94.3        |
| <b>WC1</b>                | Wind Caves     | 83.9       | 90.4       | 71.5        |
| <b>14-5</b>               | Wind Caves     | 82.7       | 59.5       | 7.9         |
| <b>14-3</b>               | Wind Caves     | 92.0       | 92.6       | 77.8        |
| <b>14-2</b>               | Wind Caves     | 94.4       | 87.9       | 66.7        |
| <b>16-2</b>               | Wind Caves     | 100.0      | 88.5       | 75.0        |
| <b>17-2</b>               | Wind Caves     | 90.6       | 90.8       | 53.8        |
| <b>17-3</b>               | Wind Caves     | 93.8       | 93.7       | 66.7        |
| <b>13-5</b>               | Wind Caves     |            | 59.2       | 0.0         |
| <b>17-4</b>               | Wind Caves     | 79.0       | 62.1       | 4.2         |
| <b>17-7</b>               | Wind Caves     | 86.0       | 75.3       | 8.7         |
| <b>17-9</b>               | Wind Caves     | 83.1       | 63.2       | 4.3         |
| <b>18-5a</b>              | Wind Caves     | 87.3       | 70.0       | 3.1         |
| <b>18-6</b>               | Wind Caves     | 82.2       | 60.1       | 4.9         |
| <b>18-7</b>               | Wind Caves     | 84.0       | 71.9       | 5.5         |
| <b>18-10</b>              | Wind Caves     | 80.0       | 69.1       | 4.5         |
| <b>18-11</b>              | Wind Caves     | 80.8       | 77.9       | 3.8         |
| <b>18-12</b>              | Wind Caves     | 71.7       | 78.3       | 12.5        |
| <b>18-15</b>              | Wind Caves     | 83.0       | 87.2       | 10.5        |
| <b>18-16</b>              | Wind Caves     | 69.5       | 75.2       | 7.9         |
| <b>18-17</b>              | Wind Caves     | 85.7       | 77.8       | 12.5        |
| <b>19-14</b>              | Wind Caves     | 81.6       | 88.3       | 0.0         |
| <b>25-11</b>              | Wind Caves     | 65.4       | 78.4       | 12.1        |
| <b>181011 Pw 1</b>        | Wind Caves     | 70.0       | 64.7       | 2.4         |

| <b>Sample</b>                   |            | <b>ATi</b> | <b>GZi</b> | <b>RuZi</b> |
|---------------------------------|------------|------------|------------|-------------|
| <b>181011 Pw 3</b>              | Wind Caves | 70.8       | 64.5       | 2.9         |
| <b>221011 HM Pw #1</b>          | Wind Caves | 72.5       | 69.2       | 1.0         |
| <b>221011 HM Pw #2</b>          | Wind Caves | 69.0       | 74.6       | 4.8         |
| <b>Mh4b</b>                     | Mud Hills  | 78.6       | 62.6       | 7.6         |
| <b>Mh5a</b>                     | Mud Hills  | 87.3       | 87.9       | 57.9        |
| <b>Mh5b</b>                     | Mud Hills  | 78.1       | 72.9       | 19.5        |
| <b>25-2a</b>                    | Mud Hills  | 80.9       | 67.1       | 0.0         |
| <b>221011 rhythmite sand #1</b> | Mud Hills  | 77.5       | 81.6       | 9.1         |
| <b>221011 rhythmite sand #2</b> | Mud Hills  | 82.6       | 72.5       | 3.8         |
| <b>221011 rhythmite sand #3</b> | Mud Hills  | 80.6       | 84.4       | 7.4         |
| <b>221011 rhythmite sand #4</b> | Mud Hills  | 71.9       | 81.6       | 8.2         |
| <b>221011 rhythmite sand #5</b> | Mud Hills  | 70.4       | 86.6       | 7.4         |
| <b>Yh 7</b>                     | Yuha       | 80.6       | 62.5       | 2.7         |
| <b>Yh 8</b>                     | Yuha       | 81.0       | 84.3       | 13.7        |
| <b>Yh9</b>                      | Yuha       | 76.8       | 52.9       | 3.5         |
| <b>291011 Py #1</b>             | Yuha       | 75.8       | 67.6       | 5.2         |
| <b>031111 Py #4</b>             | Yuha       | 70.4       | 72.2       | 2.9         |
| <b>Hu17</b>                     | Hueso      | 62.5       | 87.8       | 41.7        |

Table S3A: Garnet geochemistry data-231011L19#17.

|        |       |  |        |       |  |        |       |
|--------|-------|--|--------|-------|--|--------|-------|
| FeK: 1 | 4.989 |  | FeK: 1 | 4.423 |  | FeK: 1 | 4.262 |
| MnK: 1 | 0.084 |  | MnK: 1 | 0.194 |  | MnK: 1 | 0.321 |
| MgK: 1 | 0.729 |  | MgK: 1 | 1.158 |  | MgK: 1 | 1.21  |
| CaK: 1 | 0.267 |  | CaK: 1 | 0.325 |  | CaK: 1 | 0.294 |
|        |       |  |        |       |  |        |       |
| FeK: 1 | 4.105 |  | FeK: 1 | 4.314 |  | FeK: 1 | 4.206 |
| MnK: 1 | 0.153 |  | MnK: 1 | 0.038 |  | MnK: 1 | 0.164 |
| MgK: 1 | 1.53  |  | MgK: 1 | 1.488 |  | MgK: 1 | 1.163 |
| CaK: 1 | 0.208 |  | CaK: 1 | 0.182 |  | CaK: 1 | 0.515 |
|        |       |  |        |       |  |        |       |
| FeK: 1 | 4.584 |  | FeK: 1 | 4.667 |  | FeK: 1 | 4.066 |
| MnK: 1 | 0.376 |  | MnK: 1 | 0.293 |  | MnK: 1 | 0.135 |
| MgK: 1 | 0.761 |  | MgK: 1 | 0.95  |  | MgK: 1 | 1.535 |
| CaK: 1 | 0.354 |  | CaK: 1 | 0.101 |  | CaK: 1 | 0.371 |
|        |       |  |        |       |  |        |       |
| FeK: 1 | 4.509 |  | FeK: 1 | 4.347 |  | FeK: 1 | 4.982 |
| MnK: 1 | 0.187 |  | MnK: 1 | 0.09  |  | MnK: 1 | 0.336 |
| MgK: 1 | 1.143 |  | MgK: 1 | 1.399 |  | MgK: 1 | 0.491 |
| CaK: 1 | 0.194 |  | CaK: 1 | 0.207 |  | CaK: 1 | 0.25  |
|        |       |  |        |       |  |        |       |
| FeK: 1 | 4.343 |  | FeK: 1 | 3.787 |  | FeK: 1 | 4.378 |
| MnK: 1 | 0.11  |  | MnK: 1 | 1.482 |  | MnK: 1 | 0.352 |
| MgK: 1 | 1.267 |  | MgK: 1 | 0.217 |  | MgK: 1 | 1.241 |
| CaK: 1 | 0.236 |  | CaK: 1 | 0.709 |  | CaK: 1 | 0.305 |
|        |       |  |        |       |  |        |       |
| FeK: 1 | 5.662 |  | FeK: 1 | 4.782 |  | FeK: 1 | 2.12  |
| MnK: 1 | 0.253 |  | MnK: 1 | 0.164 |  | MnK: 1 | 0.066 |
| MgK: 1 | 0.238 |  | MgK: 1 | 0.822 |  | MgK: 1 | 0.029 |
| CaK: 1 | 0.108 |  | CaK: 1 | 0.395 |  | CaK: 1 | 5.612 |
|        |       |  |        |       |  |        |       |
| FeK: 1 | 4.945 |  | FeK: 1 | 4.491 |  | FeK: 1 | 5.413 |
| MnK: 1 | 0.061 |  | MnK: 1 | 0.075 |  | MnK: 1 | 0.272 |
| MgK: 1 | 1.14  |  | MgK: 1 | 1.481 |  | MgK: 1 | 0.423 |
| CaK: 1 | 0.164 |  | CaK: 1 | 0.174 |  | CaK: 1 | 0.095 |
|        |       |  |        |       |  |        |       |
| FeK: 1 | 5.154 |  | FeK: 1 | 4.509 |  | FeK: 1 | 3.521 |
| MnK: 1 | 0.238 |  | MnK: 1 | 0.169 |  | MnK: 1 | 0.246 |
| MgK: 1 | 0.682 |  | MgK: 1 | 1.085 |  | MgK: 1 | 0.65  |
| CaK: 1 | 0.144 |  | CaK: 1 | 0.435 |  | CaK: 1 | 1.557 |
|        |       |  |        |       |  |        |       |
| FeK: 1 | 4.613 |  | FeK: 1 | 2.384 |  | FeK: 1 | 4.024 |
| MnK: 1 | 0.091 |  | MnK: 1 | 3.013 |  | MnK: 1 | 0.085 |
| MgK: 1 | 1.276 |  | MgK: 1 | 0.55  |  | MgK: 1 | 0.052 |
| CaK: 1 | 0.191 |  | CaK: 1 | 0.138 |  | CaK: 1 | 6.327 |



|        |       |  |        |       |  |        |       |
|--------|-------|--|--------|-------|--|--------|-------|
| FeK: 1 | 4.979 |  | FeK: 1 | 4.82  |  | FeK: 1 | 4.107 |
| MnK: 1 | 0.193 |  | MnK: 1 | 0.061 |  | MnK: 1 | 0.863 |
| MgK: 1 | 0.561 |  | MgK: 1 | 1.07  |  | MgK: 1 | 0.33  |
| CaK: 1 | 0.421 |  | CaK: 1 | 0.218 |  | CaK: 1 | 0.71  |
|        |       |  |        |       |  |        |       |
| FeK: 1 | 5.326 |  | FeK: 1 | 4.943 |  | FeK: 1 | 3.222 |
| MnK: 1 | 0.138 |  | MnK: 1 | 0.147 |  | MnK: 1 | 1.872 |
| MgK: 1 | 0.576 |  | MgK: 1 | 0.854 |  | MgK: 1 | 0.801 |
| CaK: 1 | 0.149 |  | CaK: 1 | 0.17  |  | CaK: 1 | 0.279 |
|        |       |  |        |       |  |        |       |
| FeK: 1 | 3.08  |  | FeK: 1 | 4.513 |  | FeK: 1 | 4.3   |
| MnK: 1 | 2.764 |  | MnK: 1 | 0.036 |  | MnK: 1 | 0.008 |
| MgK: 1 | 0.475 |  | MgK: 1 | 1.338 |  | MgK: 1 | 1.638 |
| CaK: 1 | 0.063 |  | CaK: 1 | 0.209 |  | CaK: 1 | 0.21  |
|        |       |  |        |       |  |        |       |
| FeK: 1 | 3.804 |  | FeK: 1 | 4.519 |  | FeK: 1 | 4.696 |
| MnK: 1 | 0.199 |  | MnK: 1 | 0.079 |  | MnK: 1 | 0.078 |
| MgK: 1 | 0.828 |  | MgK: 1 | 1.333 |  | MgK: 1 | 0.956 |
| CaK: 1 | 1.482 |  | CaK: 1 | 0.173 |  | CaK: 1 | 0.174 |
|        |       |  |        |       |  |        |       |
| FeK: 1 | 4.13  |  | FeK: 1 | 4.418 |  | FeK: 1 | 4.153 |
| MnK: 1 | 0.205 |  | MnK: 1 | 1.47  |  | MnK: 1 | 0.041 |
| MgK: 1 | 0.926 |  | MgK: 1 | 0.175 |  | MgK: 1 | 0.048 |
| CaK: 1 | 1     |  | CaK: 1 | 0.183 |  | CaK: 1 | 6.437 |
|        |       |  |        |       |  |        |       |
| FeK: 1 | 4.969 |  | FeK: 1 | 4.245 |  | FeK: 1 | 4.472 |
| MnK: 1 | 0.443 |  | MnK: 1 | 0.082 |  | MnK: 1 | 0.294 |
| MgK: 1 | 0.595 |  | MgK: 1 | 1.715 |  | MgK: 1 | 0.969 |
| CaK: 1 | 0.157 |  | CaK: 1 | 0.193 |  | CaK: 1 | 0.495 |
|        |       |  |        |       |  |        |       |
| FeK: 1 | 4.701 |  | FeK: 1 | 4.301 |  | FeK: 1 | 4.56  |
| MnK: 1 | 0.286 |  | MnK: 1 | 0.132 |  | MnK: 1 | 0.179 |
| MgK: 1 | 0.679 |  | MgK: 1 | 1.23  |  | MgK: 1 | 1.156 |
| CaK: 1 | 0.407 |  | CaK: 1 | 0.36  |  | CaK: 1 | 0.232 |
|        |       |  |        |       |  |        |       |
| FeK: 1 | 5.19  |  | FeK: 1 | 5.294 |  |        |       |
| MnK: 1 | 0.135 |  | MnK: 1 | 0.314 |  |        |       |
| MgK: 1 | 0.688 |  | MgK: 1 | 0.563 |  |        |       |
| CaK: 1 | 0.104 |  | CaK: 1 | 0.166 |  |        |       |
|        |       |  |        |       |  |        |       |
| FeK: 1 | 5.062 |  | FeK: 1 | 4.485 |  |        |       |
| MnK: 1 | 0.093 |  | MnK: 1 | 0.097 |  |        |       |
| MgK: 1 | 0.875 |  | MgK: 1 | 1.226 |  |        |       |
| CaK: 1 | 0.177 |  | CaK: 1 | 0.13  |  |        |       |

Table S3B: Garnet geochemistry data-231011L19#18.

|        |       |  |        |       |  |        |       |
|--------|-------|--|--------|-------|--|--------|-------|
| FeK: 1 | 0.61  |  | FeK: 1 | 3.158 |  | FeK: 1 | 4.622 |
| MnK: 1 | 0.073 |  | MnK: 1 | 1.621 |  | MnK: 1 | 0.429 |
| MgK: 1 | 0.038 |  | MgK: 1 | 1.157 |  | MgK: 1 | 0.841 |
| CaK: 1 | 5.736 |  | CaK: 1 | 0.247 |  | CaK: 1 | 0.293 |
|        |       |  |        |       |  |        |       |
| FeK: 1 | 3.208 |  | FeK: 1 | 2.728 |  | FeK: 1 | 3.514 |
| MnK: 1 | 2.16  |  | MnK: 1 | 1.928 |  | MnK: 1 | 1.929 |
| MgK: 1 | 0.343 |  | MgK: 1 | 0.458 |  | MgK: 1 | 0.391 |
| CaK: 1 | 0.102 |  | CaK: 1 | 0.702 |  | CaK: 1 | 0.167 |
|        |       |  |        |       |  |        |       |
| FeK: 1 | 2.876 |  | FeK: 1 | 3.448 |  | FeK: 1 | 2.707 |
| MnK: 1 | 2.197 |  | MnK: 1 | 1.069 |  | MnK: 1 | 1.543 |
| MgK: 1 | 0.398 |  | MgK: 1 | 1.12  |  | MgK: 1 | 0.637 |
| CaK: 1 | 0.302 |  | CaK: 1 | 0.391 |  | CaK: 1 | 1.04  |
|        |       |  |        |       |  |        |       |
| FeK: 1 | 0.75  |  | FeK: 1 | 0.619 |  | FeK: 1 | 3.937 |
| MnK: 1 | 0.095 |  | MnK: 1 | 0.066 |  | MnK: 1 | 0.529 |
| MgK: 1 | 0.033 |  | MgK: 1 | 0.003 |  | MgK: 1 | 1.166 |
| CaK: 1 | 5.675 |  | CaK: 1 | 5.818 |  | CaK: 1 | 0.209 |
|        |       |  |        |       |  |        |       |
| FeK: 1 | 3.588 |  | FeK: 1 | 3.686 |  | FeK: 1 | 3.588 |
| MnK: 1 | 1.278 |  | MnK: 1 | 1.647 |  | MnK: 1 | 1.654 |
| MgK: 1 | 0.985 |  | MgK: 1 | 0.715 |  | MgK: 1 | 0.665 |
| CaK: 1 | 0.279 |  | CaK: 1 | 0.227 |  | CaK: 1 | 0.215 |
|        |       |  |        |       |  |        |       |
| FeK: 1 | 2.925 |  | FeK: 1 | 2.691 |  | FeK: 1 | 1.508 |
| MnK: 1 | 2.4   |  | MnK: 1 | 2.747 |  | MnK: 1 | 3.208 |
| MgK: 1 | 0.37  |  | MgK: 1 | 0.396 |  | MgK: 1 | 0.44  |
| CaK: 1 | 0.176 |  | CaK: 1 | 0.209 |  | CaK: 1 | 1     |
|        |       |  |        |       |  |        |       |
| FeK: 1 | 3.217 |  | FeK: 1 | 3.653 |  | FeK: 1 | 2.937 |
| MnK: 1 | 1.562 |  | MnK: 1 | 0.568 |  | MnK: 1 | 1.909 |
| MgK: 1 | 0.922 |  | MgK: 1 | 1.311 |  | MgK: 1 | 0.847 |
| CaK: 1 | 0.207 |  | CaK: 1 | 0.225 |  | CaK: 1 | 0.238 |
|        |       |  |        |       |  |        |       |
| FeK: 1 | 3.145 |  | FeK: 1 | 3.891 |  | FeK: 1 | 2.391 |
| MnK: 1 | 2.035 |  | MnK: 1 | 0.391 |  | MnK: 1 | 1.839 |
| MgK: 1 | 0.621 |  | MgK: 1 | 0.726 |  | MgK: 1 | 1.053 |
| CaK: 1 | 0.179 |  | CaK: 1 | 0.864 |  | CaK: 1 | 0.847 |
|        |       |  |        |       |  |        |       |
| FeK: 1 | 3.196 |  | FeK: 1 | 3.16  |  | FeK: 1 | 3.599 |
| MnK: 1 | 2.243 |  | MnK: 1 | 2.401 |  | MnK: 1 | 1.642 |
| MgK: 1 | 0.277 |  | MgK: 1 | 0.236 |  | MgK: 1 | 0.765 |
| CaK: 1 | 0.111 |  | CaK: 1 | 0.19  |  | CaK: 1 | 0.188 |

|        |       |  |        |       |  |        |       |
|--------|-------|--|--------|-------|--|--------|-------|
| FeK: 1 | 3.69  |  | FeK: 1 | 0.696 |  | FeK: 1 | 0.443 |
| MnK: 1 | 1.331 |  | MnK: 1 | 0.099 |  | MnK: 1 | 0.036 |
| MgK: 1 | 0.795 |  | MgK: 1 | 0.04  |  | MgK: 1 | 0.018 |
| CaK: 1 | 0.254 |  | CaK: 1 | 5.502 |  | CaK: 1 | 5.79  |
|        |       |  |        |       |  |        |       |
| FeK: 1 | 3.633 |  | FeK: 1 | 2.462 |  | FeK: 1 | 4.005 |
| MnK: 1 | 1.218 |  | MnK: 1 | 3.5   |  | MnK: 1 | 1.074 |
| MgK: 1 | 1.131 |  | MgK: 1 | 0.025 |  | MgK: 1 | 0.938 |
| CaK: 1 | 0.24  |  | CaK: 1 | 0.125 |  | CaK: 1 | 0.226 |
|        |       |  |        |       |  |        |       |
| FeK: 1 | 0.634 |  | FeK: 1 | 3.239 |  | FeK: 1 | 2.533 |
| MnK: 1 | 0.072 |  | MnK: 1 | 2.213 |  | MnK: 1 | 2.279 |
| MgK: 1 | 0.039 |  | MgK: 1 | 0.396 |  | MgK: 1 | 0.809 |
| CaK: 1 | 5.647 |  | CaK: 1 | 0.165 |  | CaK: 1 | 0.197 |
|        |       |  |        |       |  |        |       |
| FeK: 1 | 1.948 |  | FeK: 1 | 3.216 |  | FeK: 1 | 4.217 |
| MnK: 1 | 2.806 |  | MnK: 1 | 2.025 |  | MnK: 1 | 0.55  |
| MgK: 1 | 0.465 |  | MgK: 1 | 0.509 |  | MgK: 1 | 0.513 |
| CaK: 1 | 0.691 |  | CaK: 1 | 0.514 |  | CaK: 1 | 0.901 |
|        |       |  |        |       |  |        |       |
| FeK: 1 | 3.228 |  | FeK: 1 | 3.17  |  | FeK: 1 | 4.404 |
| MnK: 1 | 1.388 |  | MnK: 1 | 2.683 |  | MnK: 1 | 0.727 |
| MgK: 1 | 1.123 |  | MgK: 1 | 0.113 |  | MgK: 1 | 0.601 |
| CaK: 1 | 0.184 |  | CaK: 1 | 0.124 |  | CaK: 1 | 0.324 |
|        |       |  |        |       |  |        |       |
| FeK: 1 | 3.106 |  | FeK: 1 | 4.748 |  | FeK: 1 | 3.352 |
| MnK: 1 | 2.278 |  | MnK: 1 | 0.422 |  | MnK: 1 | 1.463 |
| MgK: 1 | 0.345 |  | MgK: 1 | 0.745 |  | MgK: 1 | 0.837 |
| CaK: 1 | 0.312 |  | CaK: 1 | 0.174 |  | CaK: 1 | 0.293 |
|        |       |  |        |       |  |        |       |
| FeK: 1 | 3.982 |  | FeK: 1 | 4.222 |  | FeK: 1 | 4.381 |
| MnK: 1 | 0.473 |  | MnK: 1 | 0.77  |  | MnK: 1 | 0.383 |
| MgK: 1 | 1.078 |  | MgK: 1 | 0.998 |  | MgK: 1 | 0.32  |
| CaK: 1 | 0.276 |  | CaK: 1 | 0.215 |  | CaK: 1 | 1.083 |
|        |       |  |        |       |  |        |       |
| FeK: 1 | 0.56  |  | FeK: 1 | 0.322 |  |        |       |
| MnK: 1 | 0.194 |  | MnK: 1 | 0     |  |        |       |
| MgK: 1 | 0.068 |  | MgK: 1 | 0.047 |  |        |       |
| CaK: 1 | 5.466 |  | CaK: 1 | 5.863 |  |        |       |
|        |       |  |        |       |  |        |       |
| FeK: 1 | 3.327 |  | FeK: 1 | 2.528 |  |        |       |
| MnK: 1 | 1.344 |  | MnK: 1 | 2.619 |  |        |       |
| MgK: 1 | 1.267 |  | MgK: 1 | 0.473 |  |        |       |
| CaK: 1 | 0.185 |  | CaK: 1 | 0.307 |  |        |       |

Table S3C: Garnet geochemistry data-231011L19#20.

|        |       |       |       |       |       |
|--------|-------|-------|-------|-------|-------|
| FeK: 1 | 3.79  | 0.461 | 3.732 | 4.469 | 3.492 |
| MnK: 1 | 1.684 | 0.039 | 1.199 | 0.649 | 2.15  |
| MgK: 1 | 0.563 | 0.077 | 0.935 | 0.72  | 0.264 |
| CaK: 1 | 0.238 | 5.615 | 0.202 | 0.203 | 0.116 |
|        |       |       |       |       |       |
| FeK: 1 | 3.56  | 3.684 | 3.112 | 4.218 |       |
| MnK: 1 | 1.8   | 2.213 | 2.145 | 1.1   |       |
| MgK: 1 | 0.652 | 0.235 | 0.67  | 0.458 |       |
| CaK: 1 | 0.365 | 0.181 | 0.272 | 0.216 |       |
|        |       |       |       |       |       |
| FeK: 1 | 2.823 | 0.367 | 3.818 | 3.785 |       |
| MnK: 1 | 1.741 | 0.039 | 1.546 | 1.069 |       |
| MgK: 1 | 0.537 | 0.043 | 0.66  | 1.141 |       |
| CaK: 1 | 1.063 | 5.82  | 0.202 | 0.172 |       |
|        |       |       |       |       |       |
| FeK: 1 | 3.737 | 0.772 | 0.599 | 3.234 |       |
| MnK: 1 | 1.593 | 0.013 | 0.072 | 2.561 |       |
| MgK: 1 | 0.572 | 0.009 | 0.021 | 0.201 |       |
| CaK: 1 | 0.148 | 5.638 | 5.743 | 0.116 |       |
|        |       |       |       |       |       |
| FeK: 1 | 4.391 | 3.379 | 3.721 | 3.433 |       |
| MnK: 1 | 0.215 | 2.33  | 1.606 | 2.357 |       |
| MgK: 1 | 1.016 | 0.262 | 0.753 | 0.086 |       |
| CaK: 1 | 0.582 | 0.185 | 0.232 | 0.138 |       |
|        |       |       |       |       |       |
| FeK: 1 | 0.93  | 2.582 | 2.546 | 3.413 |       |
| MnK: 1 | 0.386 | 1.776 | 3.318 | 1.675 |       |
| MgK: 1 | 0.006 | 0.967 | 0.045 | 0.597 |       |
| CaK: 1 | 4.919 | 0.453 | 0.312 | 0.502 |       |
|        |       |       |       |       |       |
| FeK: 1 | 4.176 | 4.166 | 3.697 | 3.412 |       |
| MnK: 1 | 0.529 | 1.477 | 0.968 | 1.399 |       |
| MgK: 1 | 0.207 | 0.277 | 1.185 | 0.955 |       |
| CaK: 1 | 1.102 | 0.193 | 0.191 | 0.233 |       |
|        |       |       |       |       |       |
| FeK: 1 | 3.724 | 4.146 | 2.78  | 3.791 |       |
| MnK: 1 | 0.975 | 0.644 | 2.941 | 0.961 |       |
| MgK: 1 | 1.138 | 0.485 | 0.306 | 1.16  |       |
| CaK: 1 | 0.201 | 0.886 | 0.105 | 0.22  |       |
|        |       |       |       |       |       |
| FeK: 1 | 3.716 | 2.024 | 3.179 | 3.437 |       |
| MnK: 1 | 1.201 | 2.928 | 2.475 | 1.822 |       |
| MgK: 1 | 1.037 | 0.599 | 0.316 | 0.689 |       |
| CaK: 1 | 0.153 | 0.495 | 0.231 | 0.177 |       |

Table S3D: Garnet geochemistry data-301011Pd1.

|        |       |       |       |       |       |       |
|--------|-------|-------|-------|-------|-------|-------|
| FeK: 1 | 4.92  | 0.961 | 4.5   | 4.271 | 3.836 | 2.39  |
| MnK: 1 | 0.253 | 0.021 | 0.245 | 0.123 | 0.04  | 2.592 |
| MgK: 1 | 0.552 | 0.083 | 1.203 | 1.545 | 1.766 | 0.326 |
| CaK: 1 | 0.367 | 5.752 | 0.26  | 0.222 | 0.36  | 0.764 |
|        |       |       |       |       |       |       |
| FeK: 1 | 4.725 | 4.656 | 4.656 | 4.249 | 4.69  | 1.521 |
| MnK: 1 | 0.209 | 0.206 | 0.122 | 0.106 | 0.26  | 0.039 |
| MgK: 1 | 1.131 | 1.138 | 1.136 | 1.473 | 0.962 | 0.041 |
| CaK: 1 | 0.177 | 0.295 | 0.147 | 0.345 | 0.159 | 6.069 |
|        |       |       |       |       |       |       |
| FeK: 1 | 4.691 | 4.406 | 3.73  | 4.793 | 4.915 | 4.684 |
| MnK: 1 | 0.204 | 0.462 | 0.107 | 0.277 | 0.149 | 0.181 |
| MgK: 1 | 0.942 | 0.978 | 1.218 | 0.649 | 0.852 | 1.045 |
| CaK: 1 | 0.201 | 0.175 | 0.857 | 0.166 | 0.176 | 0.234 |
|        |       |       |       |       |       |       |
| FeK: 1 | 4.819 | 2.909 | 4.598 | 4.886 | 4.8   | 4.836 |
| MnK: 1 | 0.281 | 2.893 | 0.176 | 0.456 | 0.72  | 0.115 |
| MgK: 1 | 0.827 | 0.115 | 1.116 | 0.712 | 0.131 | 0.875 |
| CaK: 1 | 0.2   | 0.345 | 0.14  | 0.209 | 0.51  | 0.177 |
|        |       |       |       |       |       |       |
| FeK: 1 | 3.713 | 4.47  | 4.566 | 4.406 | 0.601 | 4.826 |
| MnK: 1 | 0.09  | 0.876 | 0.157 | 0.475 | 0.014 | 0.128 |
| MgK: 1 | 1.987 | 0.674 | 0.978 | 0.304 | 0.158 | 1.095 |
| CaK: 1 | 0.324 | 0.267 | 0.273 | 1.065 | 5.916 | 0.138 |
|        |       |       |       |       |       |       |
| FeK: 1 | 4.309 | 4.761 | 4.13  | 4.149 | 4.604 | 2.736 |
| MnK: 1 | 0.053 | 0.236 | 0.058 | 0.118 | 0.02  | 2.225 |
| MgK: 1 | 0.029 | 0.917 | 1.687 | 1.602 | 1.048 | 0.377 |
| CaK: 1 | 6.408 | 0.18  | 0.213 | 0.231 | 0.578 | 0.702 |
|        |       |       |       |       |       |       |
| FeK: 1 | 3.744 | 4.689 | 5.097 | 4.611 | 5.077 | 4.624 |
| MnK: 1 | 0.061 | 0.326 | 0.216 | 0.136 | 0.033 | 0.127 |
| MgK: 1 | 1.095 | 0.681 | 0.749 | 1.259 | 0.873 | 1.15  |
| CaK: 1 | 1.377 | 0.195 | 0.172 | 0.176 | 0.191 | 0.188 |
|        |       |       |       |       |       |       |
| FeK: 1 | 4.089 | 3.909 | 3.816 | 0.89  | 3.253 |       |
| MnK: 1 | 0.202 | 1.381 | 0.214 | 0.087 | 1.79  |       |
| MgK: 1 | 1.205 | 0.762 | 1.361 | 0.138 | 0.753 |       |
| CaK: 1 | 0.658 | 0.18  | 0.59  | 5.916 | 0.234 |       |
|        |       |       |       |       |       |       |
| FeK: 1 | 3.881 | 3.667 | 4.211 | 4.988 | 3.561 |       |
| MnK: 1 | 0.128 | 0.046 | 0.989 | 0.484 | 0.54  |       |
| MgK: 1 | 1.416 | 2.217 | 0.522 | 0.414 | 0.164 |       |
| CaK: 1 | 0.67  | 0.22  | 0.467 | 0.368 | 1.996 |       |

Table S4A: U-Pb zircon data-221011 Pch#5.

| Sample       | U [ppm] <sup>a</sup> | Pb [ppm] <sup>a</sup> | Th/U <sup>a</sup> | RATIOS                                           |              |                                                  |              |                  |                                                   |              | AGES [Ma]                           |            |                                     |            |                                      |            | Conc. |
|--------------|----------------------|-----------------------|-------------------|--------------------------------------------------|--------------|--------------------------------------------------|--------------|------------------|---------------------------------------------------|--------------|-------------------------------------|------------|-------------------------------------|------------|--------------------------------------|------------|-------|
|              |                      |                       |                   | <sup>207</sup> Pb/ <sup>235</sup> U <sup>b</sup> | 2 $\sigma^d$ | <sup>206</sup> Pb/ <sup>238</sup> U <sup>b</sup> | 2 $\sigma^d$ | rho <sup>c</sup> | <sup>207</sup> Pb/ <sup>206</sup> Pb <sup>e</sup> | 2 $\sigma^d$ | <sup>207</sup> Pb/ <sup>235</sup> U | 2 $\sigma$ | <sup>206</sup> Pb/ <sup>238</sup> U | 2 $\sigma$ | <sup>207</sup> Pb/ <sup>206</sup> Pb | 2 $\sigma$ | %     |
| 221011 Pch#5 | 108                  | 2                     | 0.53              | 0.10                                             | 0.01         | 0.0144                                           | 0.0003       | 0.38             | 0.050                                             | 0.005        | 96                                  | 5          | 92                                  | 2          | 199                                  | 226        | 96    |
| 221011 Pch#5 | 521                  | 162                   | 0.30              | 4.62                                             | 0.09         | 0.3118                                           | 0.0041       | 0.64             | 0.107                                             | 0.003        | 1752                                | 36         | 1749                                | 20         | 1755                                 | 57         | 100   |
| 221011 Pch#5 | 90                   | 18                    | 0.58              | 2.27                                             | 0.05         | 0.2050                                           | 0.0029       | 0.65             | 0.080                                             | 0.003        | 1203                                | 26         | 1202                                | 16         | 1204                                 | 65         | 100   |
| 221011 Pch#5 | 4382                 | 993                   | 12.50             | 3.08                                             | 0.06         | 0.2267                                           | 0.0030       | 0.64             | 0.098                                             | 0.003        | 1427                                | 29         | 1317                                | 16         | 1595                                 | 58         | 92    |
| 221011 Pch#5 | 113                  | 29                    | 0.36              | 3.62                                             | 0.08         | 0.2585                                           | 0.0037       | 0.67             | 0.102                                             | 0.003        | 1554                                | 34         | 1482                                | 19         | 1654                                 | 59         | 95    |
| 221011 Pch#5 | 918                  | 49                    | 0.63              | 0.44                                             | 0.01         | 0.0533                                           | 0.0010       | 0.68             | 0.060                                             | 0.002        | 370                                 | 10         | 335                                 | 6          | 595                                  | 85         | 91    |
| 221011 Pch#5 | 178                  | 42                    | 0.43              | 2.94                                             | 0.06         | 0.2370                                           | 0.0033       | 0.65             | 0.090                                             | 0.003        | 1393                                | 30         | 1371                                | 17         | 1428                                 | 61         | 98    |
| 221011 Pch#5 | 658                  | 10                    | 0.39              | 0.10                                             | 0.00         | 0.0152                                           | 0.0002       | 0.40             | 0.048                                             | 0.003        | 97                                  | 4          | 97                                  | 2          | 91                                   | 170        | 100   |
| 221011 Pch#5 | 97                   | 1                     | 0.58              | 0.09                                             | 0.01         | 0.0124                                           | 0.0003       | 0.28             | 0.056                                             | 0.009        | 92                                  | 8          | 79                                  | 2          | 436                                  | 352        | 86    |
| 221011 Pch#5 | 70                   | 14                    | 0.56              | 2.15                                             | 0.05         | 0.1975                                           | 0.0032       | 0.66             | 0.079                                             | 0.003        | 1167                                | 29         | 1162                                | 17         | 1176                                 | 72         | 100   |
| 221011 Pch#5 | 153                  | 45                    | 0.38              | 4.05                                             | 0.08         | 0.2904                                           | 0.0039       | 0.64             | 0.101                                             | 0.003        | 1644                                | 34         | 1644                                | 20         | 1644                                 | 58         | 100   |
| 221011 Pch#5 | 419                  | 2                     | 0.30              | 0.03                                             | 0.00         | 0.0038                                           | 0.0001       | 0.33             | 0.057                                             | 0.007        | 30                                  | 2          | 25                                  | 1          | 493                                  | 256        | 82    |
| 221011 Pch#5 | 147                  | 28                    | 0.27              | 2.01                                             | 0.04         | 0.1892                                           | 0.0026       | 0.65             | 0.077                                             | 0.003        | 1118                                | 24         | 1117                                | 14         | 1120                                 | 64         | 100   |
| 221011 Pch#5 | 306                  | 95                    | 0.37              | 4.46                                             | 0.11         | 0.3091                                           | 0.0052       | 0.68             | 0.105                                             | 0.004        | 1724                                | 43         | 1736                                | 26         | 1709                                 | 66         | 101   |
| 221011 Pch#5 | 204                  | 62                    | 0.55              | 4.38                                             | 0.09         | 0.3032                                           | 0.0041       | 0.65             | 0.105                                             | 0.003        | 1709                                | 35         | 1707                                | 20         | 1712                                 | 58         | 100   |
| 221011 Pch#5 | 537                  | 104                   | 0.10              | 2.05                                             | 0.04         | 0.1932                                           | 0.0026       | 0.64             | 0.077                                             | 0.002        | 1134                                | 23         | 1138                                | 14         | 1125                                 | 63         | 100   |
| 221011 Pch#5 | 234                  | 55                    | 0.39              | 2.90                                             | 0.06         | 0.2345                                           | 0.0034       | 0.66             | 0.090                                             | 0.003        | 1381                                | 30         | 1358                                | 18         | 1416                                 | 62         | 98    |
| 221011 Pch#5 | 3728                 | 701                   | 0.15              | 3.03                                             | 0.06         | 0.1880                                           | 0.0025       | 0.64             | 0.117                                             | 0.004        | 1415                                | 29         | 1111                                | 13         | 1908                                 | 55         | 78    |
| 221011 Pch#5 | 74                   | 13                    | 0.83              | 1.77                                             | 0.05         | 0.1723                                           | 0.0029       | 0.65             | 0.074                                             | 0.003        | 1034                                | 27         | 1025                                | 16         | 1053                                 | 78         | 99    |
| 221011 Pch#5 | 133                  | 34                    | 0.58              | 3.29                                             | 0.08         | 0.2537                                           | 0.0045       | 0.74             | 0.094                                             | 0.003        | 1478                                | 36         | 1458                                | 23         | 1508                                 | 60         | 99    |
| 221011 Pch#5 | 3097                 | 24                    | 0.37              | 0.06                                             | 0.00         | 0.0079                                           | 0.0001       | 0.50             | 0.057                                             | 0.003        | 61                                  | 2          | 51                                  | 1          | 502                                  | 95         | 83    |
| 221011 Pch#5 | 65                   | 5                     | 0.32              | 0.87                                             | 0.03         | 0.0840                                           | 0.0016       | 0.65             | 0.075                                             | 0.003        | 633                                 | 19         | 520                                 | 10         | 1062                                 | 89         | 82    |
| 221011 Pch#5 | 92                   | 22                    | 0.31              | 2.99                                             | 0.06         | 0.2426                                           | 0.0034       | 0.65             | 0.089                                             | 0.003        | 1405                                | 30         | 1400                                | 18         | 1411                                 | 62         | 100   |
| 221011 Pch#5 | 116                  | 1                     | 0.88              | 0.04                                             | 0.00         | 0.0061                                           | 0.0002       | 0.37             | 0.047                                             | 0.006        | 39                                  | 3          | 39                                  | 1          | 39                                   | 302        | 100   |
| 221011 Pch#5 | 717                  | 221                   | 0.38              | 4.48                                             | 0.09         | 0.3076                                           | 0.0041       | 0.65             | 0.106                                             | 0.003        | 1728                                | 36         | 1729                                | 20         | 1727                                 | 57         | 100   |
| 221011 Pch#5 | 1012                 | 315                   | 0.19              | 4.59                                             | 0.09         | 0.3107                                           | 0.0041       | 0.64             | 0.107                                             | 0.003        | 1747                                | 36         | 1744                                | 20         | 1750                                 | 56         | 100   |
| 221011 Pch#5 | 363                  | 5                     | 0.29              | 0.13                                             | 0.00         | 0.0150                                           | 0.0003       | 0.53             | 0.061                                             | 0.004        | 120                                 | 5          | 96                                  | 2          | 636                                  | 134        | 80    |
| 221011 Pch#5 | 535                  | 31                    | 0.09              | 0.43                                             | 0.01         | 0.0574                                           | 0.0008       | 0.62             | 0.054                                             | 0.002        | 362                                 | 8          | 360                                 | 5          | 377                                  | 80         | 99    |
| 221011 Pch#5 | 145                  | 1                     | 0.40              | 0.05                                             | 0.01         | 0.0058                                           | 0.0002       | 0.33             | 0.057                                             | 0.012        | 45                                  | 5          | 37                                  | 1          | 484                                  | 450        | 83    |
| 221011 Pch#5 | 135                  | 23                    | 0.27              | 2.02                                             | 0.05         | 0.1723                                           | 0.0025       | 0.66             | 0.085                                             | 0.003        | 1122                                | 25         | 1025                                | 14         | 1316                                 | 65         | 91    |
| 221011 Pch#5 | 102                  | 24                    | 0.16              | 2.89                                             | 0.06         | 0.2388                                           | 0.0034       | 0.65             | 0.088                                             | 0.003        | 1379                                | 30         | 1381                                | 17         | 1378                                 | 62         | 100   |
| 221011 Pch#5 | 58                   | 18                    | 0.48              | 4.36                                             | 0.10         | 0.3022                                           | 0.0048       | 0.67             | 0.105                                             | 0.004        | 1704                                | 41         | 1702                                | 24         | 1707                                 | 64         | 100   |

|              |      |     |      |       |      |        |        |      |       |       |      |    |      |    |      |     |     |
|--------------|------|-----|------|-------|------|--------|--------|------|-------|-------|------|----|------|----|------|-----|-----|
| 221011 Pch#5 | 228  | 45  | 0.27 | 2.18  | 0.05 | 0.1991 | 0.0027 | 0.65 | 0.079 | 0.003 | 1173 | 24 | 1170 | 14 | 1178 | 62  | 100 |
| 221011 Pch#5 | 733  | 4   | 0.69 | 0.04  | 0.00 | 0.0052 | 0.0001 | 0.43 | 0.050 | 0.005 | 36   | 2  | 34   | 1  | 203  | 216 | 93  |
| 221011 Pch#5 | 733  | 3   | 1.05 | 0.04  | 0.00 | 0.0048 | 0.0001 | 0.43 | 0.065 | 0.006 | 42   | 2  | 31   | 1  | 769  | 181 | 72  |
| 221011 Pch#5 | 269  | 62  | 0.43 | 3.65  | 0.08 | 0.2318 | 0.0031 | 0.65 | 0.114 | 0.004 | 1561 | 33 | 1344 | 16 | 1867 | 57  | 86  |
| 221011 Pch#5 | 242  | 7   | 0.95 | 0.23  | 0.01 | 0.0275 | 0.0005 | 0.55 | 0.062 | 0.003 | 213  | 7  | 175  | 3  | 657  | 108 | 82  |
| 221011 Pch#5 | 249  | 52  | 0.22 | 2.61  | 0.05 | 0.2084 | 0.0029 | 0.65 | 0.091 | 0.003 | 1304 | 27 | 1220 | 15 | 1445 | 60  | 94  |
| 221011 Pch#5 | 161  | 29  | 0.35 | 1.86  | 0.04 | 0.1773 | 0.0027 | 0.67 | 0.076 | 0.003 | 1066 | 24 | 1052 | 15 | 1095 | 65  | 99  |
| 221011 Pch#5 | 147  | 3   | 0.47 | 0.13  | 0.00 | 0.0192 | 0.0004 | 0.59 | 0.049 | 0.003 | 123  | 4  | 122  | 3  | 140  | 132 | 99  |
| 221011 Pch#5 | 148  | 3   | 0.24 | 0.14  | 0.01 | 0.0204 | 0.0004 | 0.40 | 0.049 | 0.004 | 131  | 6  | 130  | 2  | 152  | 195 | 99  |
| 221011 Pch#5 | 1240 | 6   | 0.45 | 0.03  | 0.00 | 0.0046 | 0.0001 | 0.51 | 0.050 | 0.003 | 31   | 1  | 29   | 0  | 201  | 133 | 93  |
| 221011 Pch#5 | 83   | 25  | 0.61 | 4.46  | 0.13 | 0.3052 | 0.0063 | 0.71 | 0.106 | 0.004 | 1724 | 50 | 1717 | 31 | 1734 | 75  | 100 |
| 221011 Pch#5 | 101  | 14  | 0.19 | 1.48  | 0.04 | 0.1385 | 0.0024 | 0.69 | 0.078 | 0.003 | 923  | 23 | 836  | 14 | 1138 | 71  | 91  |
| 221011 Pch#5 | 276  | 2   | 0.31 | 0.05  | 0.00 | 0.0062 | 0.0001 | 0.41 | 0.055 | 0.006 | 47   | 3  | 40   | 1  | 422  | 216 | 85  |
| 221011 Pch#5 | 67   | 25  | 0.35 | 6.74  | 0.14 | 0.3802 | 0.0053 | 0.66 | 0.129 | 0.004 | 2078 | 44 | 2077 | 25 | 2080 | 56  | 100 |
| 221011 Pch#5 | 97   | 1   | 0.53 | 0.07  | 0.01 | 0.0057 | 0.0003 | 0.51 | 0.095 | 0.016 | 73   | 7  | 37   | 2  | 1533 | 299 | 50  |
| 221011 Pch#5 | 147  | 2   | 0.34 | 0.09  | 0.00 | 0.0131 | 0.0003 | 0.48 | 0.049 | 0.004 | 86   | 4  | 84   | 2  | 139  | 202 | 98  |
| 221011 Pch#5 | 257  | 2   | 0.59 | 0.05  | 0.00 | 0.0069 | 0.0001 | 0.31 | 0.048 | 0.006 | 45   | 3  | 44   | 1  | 75   | 290 | 99  |
| 221011 Pch#5 | 108  | 27  | 0.44 | 3.13  | 0.07 | 0.2483 | 0.0038 | 0.66 | 0.091 | 0.003 | 1439 | 33 | 1430 | 19 | 1454 | 65  | 99  |
| 221011 Pch#5 | 57   | 17  | 0.54 | 4.24  | 0.09 | 0.2979 | 0.0043 | 0.66 | 0.103 | 0.003 | 1682 | 37 | 1681 | 21 | 1683 | 60  | 100 |
| 221011 Pch#5 | 128  | 38  | 0.36 | 4.20  | 0.09 | 0.2967 | 0.0043 | 0.66 | 0.103 | 0.003 | 1674 | 37 | 1675 | 21 | 1672 | 60  | 100 |
| 221011 Pch#5 | 304  | 2   | 0.81 | 0.07  | 0.00 | 0.0071 | 0.0003 | 0.59 | 0.070 | 0.007 | 67   | 4  | 46   | 2  | 926  | 200 | 68  |
| 221011 Pch#5 | 223  | 70  | 0.29 | 4.62  | 0.10 | 0.3120 | 0.0043 | 0.65 | 0.107 | 0.003 | 1752 | 37 | 1750 | 21 | 1755 | 58  | 100 |
| 221011 Pch#5 | 393  | 114 | 0.20 | 4.10  | 0.10 | 0.2897 | 0.0048 | 0.71 | 0.103 | 0.003 | 1655 | 39 | 1640 | 24 | 1674 | 61  | 99  |
| 221011 Pch#5 | 287  | 3   | 0.17 | 0.09  | 0.00 | 0.0114 | 0.0003 | 0.56 | 0.055 | 0.004 | 85   | 3  | 73   | 2  | 424  | 144 | 86  |
| 221011 Pch#5 | 616  | 7   | 0.26 | 0.08  | 0.00 | 0.0114 | 0.0002 | 0.31 | 0.051 | 0.005 | 78   | 4  | 73   | 1  | 223  | 218 | 94  |
| 221011 Pch#5 | 250  | 1   | 0.41 | 0.03  | 0.00 | 0.0051 | 0.0001 | 0.31 | 0.047 | 0.007 | 33   | 3  | 33   | 1  | 56   | 333 | 99  |
| 221011 Pch#5 | 402  | 58  | 0.24 | 1.54  | 0.03 | 0.1447 | 0.0021 | 0.67 | 0.077 | 0.002 | 945  | 20 | 871  | 12 | 1122 | 63  | 92  |
| 221011 Pch#5 | 1087 | 37  | 0.23 | 0.25  | 0.01 | 0.0342 | 0.0005 | 0.53 | 0.053 | 0.002 | 226  | 6  | 217  | 3  | 325  | 96  | 96  |
| 221011 Pch#5 | 177  | 97  | 0.35 | 15.21 | 0.32 | 0.5480 | 0.0078 | 0.67 | 0.201 | 0.006 | 2828 | 60 | 2817 | 32 | 2837 | 51  | 100 |
| 221011 Pch#5 | 128  | 32  | 0.25 | 3.15  | 0.07 | 0.2507 | 0.0035 | 0.66 | 0.091 | 0.003 | 1445 | 31 | 1442 | 18 | 1450 | 61  | 100 |
| 221011 Pch#5 | 43   | 4   | 0.39 | 0.91  | 0.03 | 0.0969 | 0.0017 | 0.47 | 0.068 | 0.005 | 660  | 25 | 596  | 10 | 882  | 133 | 90  |
| 221011 Pch#5 | 514  | 8   | 0.25 | 0.11  | 0.00 | 0.0159 | 0.0003 | 0.57 | 0.048 | 0.002 | 102  | 3  | 102  | 2  | 103  | 108 | 100 |
| 221011 Pch#5 | 73   | 13  | 0.32 | 1.91  | 0.05 | 0.1767 | 0.0030 | 0.68 | 0.078 | 0.003 | 1084 | 27 | 1049 | 16 | 1156 | 71  | 97  |
| 221011 Pch#5 | 177  | 36  | 0.38 | 2.78  | 0.06 | 0.2058 | 0.0029 | 0.65 | 0.098 | 0.003 | 1351 | 29 | 1206 | 16 | 1590 | 61  | 89  |
| 221011 Pch#5 | 270  | 55  | 0.41 | 2.60  | 0.06 | 0.2037 | 0.0028 | 0.64 | 0.093 | 0.003 | 1301 | 28 | 1195 | 15 | 1481 | 62  | 92  |

|              |     |     |      |      |      |        |        |      |       |       |      |    |      |    |      |     |     |
|--------------|-----|-----|------|------|------|--------|--------|------|-------|-------|------|----|------|----|------|-----|-----|
| 221011 Pch#5 | 92  | 16  | 0.33 | 1.80 | 0.04 | 0.1762 | 0.0027 | 0.66 | 0.074 | 0.003 | 1046 | 24 | 1046 | 15 | 1046 | 70  | 100 |
| 221011 Pch#5 | 559 | 182 | 0.40 | 6.85 | 0.14 | 0.3258 | 0.0045 | 0.66 | 0.153 | 0.005 | 2092 | 44 | 1818 | 22 | 2374 | 54  | 87  |
| 221011 Pch#5 | 120 | 7   | 0.57 | 0.48 | 0.01 | 0.0606 | 0.0010 | 0.61 | 0.058 | 0.003 | 399  | 11 | 379  | 6  | 514  | 96  | 95  |
| 221011 Pch#5 | 85  | 18  | 0.33 | 2.53 | 0.06 | 0.2163 | 0.0041 | 0.73 | 0.085 | 0.003 | 1280 | 33 | 1262 | 22 | 1309 | 68  | 99  |
| 221011 Pch#5 | 295 | 92  | 0.17 | 4.59 | 0.10 | 0.3106 | 0.0042 | 0.65 | 0.107 | 0.003 | 1747 | 36 | 1744 | 21 | 1751 | 57  | 100 |
| 221011 Pch#5 | 16  | 1   | 1.72 | 0.36 | 0.03 | 0.0358 | 0.0011 | 0.36 | 0.072 | 0.011 | 310  | 26 | 227  | 7  | 996  | 300 | 73  |
| 221011 Pch#5 | 169 | 38  | 0.48 | 2.85 | 0.06 | 0.2255 | 0.0035 | 0.70 | 0.092 | 0.003 | 1368 | 31 | 1311 | 19 | 1458 | 61  | 96  |
| 221011 Pch#5 | 112 | 32  | 0.39 | 4.05 | 0.09 | 0.2824 | 0.0047 | 0.72 | 0.104 | 0.003 | 1644 | 38 | 1604 | 24 | 1695 | 59  | 98  |
| 221011 Pch#5 | 277 | 16  | 0.37 | 0.44 | 0.01 | 0.0571 | 0.0009 | 0.49 | 0.056 | 0.003 | 372  | 12 | 358  | 5  | 457  | 118 | 96  |
| 221011 Pch#5 | 186 | 1   | 0.34 | 0.05 | 0.00 | 0.0080 | 0.0002 | 0.40 | 0.048 | 0.004 | 53   | 3  | 52   | 1  | 96   | 213 | 98  |
| 221011 Pch#5 | 40  | 9   | 0.49 | 2.58 | 0.06 | 0.2217 | 0.0034 | 0.66 | 0.084 | 0.003 | 1294 | 30 | 1291 | 18 | 1300 | 67  | 100 |
| 221011 Pch#5 | 133 | 39  | 0.35 | 4.13 | 0.09 | 0.2935 | 0.0041 | 0.66 | 0.102 | 0.003 | 1660 | 35 | 1659 | 20 | 1660 | 59  | 100 |
| 221011 Pch#5 | 467 | 3   | 0.49 | 0.05 | 0.00 | 0.0058 | 0.0002 | 0.52 | 0.063 | 0.006 | 50   | 3  | 37   | 1  | 708  | 211 | 75  |
| 221011 Pch#5 | 118 | 38  | 0.35 | 4.85 | 0.14 | 0.3194 | 0.0064 | 0.70 | 0.110 | 0.004 | 1794 | 51 | 1787 | 31 | 1802 | 73  | 100 |
| 221011 Pch#5 | 365 | 1   | 0.75 | 0.04 | 0.00 | 0.0038 | 0.0001 | 0.45 | 0.068 | 0.007 | 35   | 2  | 24   | 1  | 861  | 212 | 69  |
| 221011 Pch#5 | 310 | 4   | 0.50 | 0.10 | 0.00 | 0.0123 | 0.0002 | 0.46 | 0.058 | 0.004 | 95   | 4  | 79   | 1  | 531  | 149 | 83  |
| 221011 Pch#5 | 151 | 28  | 0.26 | 1.97 | 0.04 | 0.1867 | 0.0027 | 0.65 | 0.077 | 0.003 | 1106 | 24 | 1104 | 14 | 1111 | 65  | 100 |
| 221011 Pch#5 | 409 | 70  | 0.21 | 1.75 | 0.04 | 0.1720 | 0.0024 | 0.65 | 0.074 | 0.002 | 1026 | 22 | 1023 | 13 | 1031 | 64  | 100 |
| 221011 Pch#5 | 87  | 22  | 0.73 | 3.19 | 0.08 | 0.2524 | 0.0043 | 0.68 | 0.092 | 0.003 | 1454 | 37 | 1451 | 22 | 1459 | 71  | 100 |
| 221011 Pch#5 | 957 | 103 | 0.27 | 1.57 | 0.03 | 0.1076 | 0.0015 | 0.65 | 0.106 | 0.003 | 958  | 21 | 659  | 9  | 1729 | 60  | 69  |

<sup>a</sup>U and Pb concentrations and Th/U ratios are calculated relative to GJ-1 reference zircon

<sup>b</sup>Corrected for background and within-run Pb/U fractionation and normalised to reference zircon GJ-1 (ID-TIMS values/measured value); <sup>207</sup>Pb/<sup>235</sup>U calculated using (<sup>207</sup>Pb/<sup>206</sup>Pb)/(<sup>238</sup>U/<sup>206</sup>Pb \* 1/137.88)

<sup>c</sup>Rho is the error correlation defined as the quotient of the propagated errors of the <sup>206</sup>Pb/<sup>238</sup>U and the <sup>207</sup>/<sup>235</sup>U ratio

<sup>d</sup>Quadratic addition of within-run errors (2 SD) and daily reproducibility of GJ-1 (2 SD)

<sup>e</sup>Corrected for mass-bias by normalising to GJ-1 reference zircon (~0.6 per atomic mass unit) and common Pb using the model Pb composition of Stacey & Kramers (1975)



Table S4B: U-Pb zircon data-281011 Cb#2.

| Sample      | U [ppm] <sup>a</sup> | Pb [ppm] <sup>a</sup> | Th/U <sup>a</sup> | RATIOS                                           |              |                                                  |              |                  |                                                   |              | AGES [Ma]                           |            |                                     |            |                                      |            | Conc. |
|-------------|----------------------|-----------------------|-------------------|--------------------------------------------------|--------------|--------------------------------------------------|--------------|------------------|---------------------------------------------------|--------------|-------------------------------------|------------|-------------------------------------|------------|--------------------------------------|------------|-------|
|             |                      |                       |                   | <sup>207</sup> Pb/ <sup>235</sup> U <sup>b</sup> | 2 $\sigma^d$ | <sup>206</sup> Pb/ <sup>238</sup> U <sup>b</sup> | 2 $\sigma^d$ | rho <sup>c</sup> | <sup>207</sup> Pb/ <sup>206</sup> Pb <sup>e</sup> | 2 $\sigma^d$ | <sup>207</sup> Pb/ <sup>235</sup> U | 2 $\sigma$ | <sup>206</sup> Pb/ <sup>238</sup> U | 2 $\sigma$ | <sup>207</sup> Pb/ <sup>206</sup> Pb | 2 $\sigma$ | %     |
| 281011 Cb#2 | 842                  | 18                    | 0.13              | 0.146                                            | 0.004        | 0.0217                                           | 0.0003       | 0.61             | 0.049                                             | 0.002        | 138                                 | 4          | 138                                 | 2          | 137                                  | 94         | 100   |
| 281011 Cb#2 | 79                   | 1                     | 0.30              | 0.117                                            | 0.014        | 0.0175                                           | 0.0012       | 0.58             | 0.049                                             | 0.009        | 112                                 | 13         | 112                                 | 8          | 129                                  | 420        | 99    |
| 281011 Cb#2 | 1302                 | 23                    | 0.17              | 0.116                                            | 0.003        | 0.0174                                           | 0.0002       | 0.50             | 0.048                                             | 0.002        | 112                                 | 3          | 111                                 | 2          | 118                                  | 111        | 100   |
| 281011 Cb#2 | 156                  | 4                     | 0.21              | 0.175                                            | 0.005        | 0.0258                                           | 0.0004       | 0.56             | 0.049                                             | 0.003        | 164                                 | 5          | 164                                 | 3          | 161                                  | 116        | 100   |
| 281011 Cb#2 | 1140                 | 17                    | 0.22              | 0.104                                            | 0.003        | 0.0153                                           | 0.0002       | 0.52             | 0.049                                             | 0.003        | 100                                 | 3          | 98                                  | 2          | 167                                  | 118        | 97    |
| 281011 Cb#2 | 430                  | 6                     | 0.32              | 0.098                                            | 0.004        | 0.0148                                           | 0.0002       | 0.39             | 0.048                                             | 0.003        | 95                                  | 4          | 95                                  | 1          | 94                                   | 163        | 100   |
| 281011 Cb#2 | 379                  | 6                     | 0.26              | 0.098                                            | 0.003        | 0.0147                                           | 0.0002       | 0.46             | 0.048                                             | 0.003        | 95                                  | 3          | 94                                  | 1          | 108                                  | 132        | 100   |
| 281011 Cb#2 | 404                  | 6                     | 0.21              | 0.101                                            | 0.004        | 0.0150                                           | 0.0002       | 0.45             | 0.049                                             | 0.003        | 98                                  | 4          | 96                                  | 1          | 151                                  | 147        | 98    |
| 281011 Cb#2 | 281                  | 4                     | 0.18              | 0.104                                            | 0.004        | 0.0157                                           | 0.0003       | 0.43             | 0.048                                             | 0.003        | 100                                 | 4          | 100                                 | 2          | 102                                  | 162        | 100   |
| 281011 Cb#2 | 738                  | 19                    | 0.15              | 0.180                                            | 0.005        | 0.0257                                           | 0.0004       | 0.55             | 0.051                                             | 0.002        | 168                                 | 5          | 164                                 | 3          | 224                                  | 107        | 98    |
| 281011 Cb#2 | 209                  | 3                     | 0.18              | 0.105                                            | 0.005        | 0.0157                                           | 0.0002       | 0.34             | 0.048                                             | 0.004        | 101                                 | 5          | 101                                 | 2          | 113                                  | 194        | 100   |
| 281011 Cb#2 | 888                  | 271                   | 0.26              | 4.430                                            | 0.091        | 0.3054                                           | 0.0041       | 0.65             | 0.105                                             | 0.003        | 1718                                | 35         | 1718                                | 20         | 1718                                 | 57         | 100   |
| 281011 Cb#2 | 93                   | 2                     | 0.18              | 0.112                                            | 0.007        | 0.0169                                           | 0.0003       | 0.34             | 0.048                                             | 0.005        | 108                                 | 6          | 108                                 | 2          | 109                                  | 253        | 100   |
| 281011 Cb#2 | 362                  | 6                     | 0.21              | 0.131                                            | 0.005        | 0.0159                                           | 0.0003       | 0.50             | 0.060                                             | 0.004        | 125                                 | 5          | 102                                 | 2          | 597                                  | 147        | 81    |
| 281011 Cb#2 | 1078                 | 18                    | 0.13              | 0.109                                            | 0.002        | 0.0165                                           | 0.0002       | 0.64             | 0.048                                             | 0.002        | 105                                 | 2          | 105                                 | 2          | 106                                  | 82         | 100   |
| 281011 Cb#2 | 682                  | 10                    | 0.14              | 0.100                                            | 0.003        | 0.0151                                           | 0.0002       | 0.62             | 0.048                                             | 0.002        | 97                                  | 2          | 97                                  | 2          | 101                                  | 94         | 100   |
| 281011 Cb#2 | 315                  | 5                     | 0.33              | 0.104                                            | 0.003        | 0.0157                                           | 0.0003       | 0.56             | 0.048                                             | 0.002        | 101                                 | 3          | 101                                 | 2          | 106                                  | 113        | 100   |
| 281011 Cb#2 | 653                  | 10                    | 0.30              | 0.106                                            | 0.003        | 0.0159                                           | 0.0003       | 0.60             | 0.048                                             | 0.002        | 102                                 | 3          | 102                                 | 2          | 111                                  | 110        | 100   |
| 281011 Cb#2 | 293                  | 5                     | 0.24              | 0.103                                            | 0.005        | 0.0154                                           | 0.0003       | 0.35             | 0.048                                             | 0.004        | 100                                 | 5          | 99                                  | 2          | 122                                  | 208        | 99    |
| 281011 Cb#2 | 237                  | 6                     | 0.26              | 0.178                                            | 0.007        | 0.0262                                           | 0.0004       | 0.37             | 0.049                                             | 0.004        | 166                                 | 7          | 167                                 | 2          | 160                                  | 174        | 100   |
| 281011 Cb#2 | 203                  | 3                     | 0.20              | 0.099                                            | 0.005        | 0.0149                                           | 0.0003       | 0.33             | 0.048                                             | 0.005        | 96                                  | 5          | 96                                  | 2          | 110                                  | 227        | 99    |
| 281011 Cb#2 | 309                  | 5                     | 0.21              | 0.107                                            | 0.003        | 0.0161                                           | 0.0003       | 0.57             | 0.048                                             | 0.002        | 103                                 | 3          | 103                                 | 2          | 119                                  | 117        | 99    |
| 281011 Cb#2 | 330                  | 9                     | 0.23              | 0.176                                            | 0.004        | 0.0261                                           | 0.0004       | 0.62             | 0.049                                             | 0.002        | 165                                 | 4          | 166                                 | 3          | 151                                  | 90         | 101   |
| 281011 Cb#2 | 608                  | 10                    | 0.20              | 0.105                                            | 0.003        | 0.0157                                           | 0.0003       | 0.58             | 0.048                                             | 0.002        | 101                                 | 3          | 100                                 | 2          | 117                                  | 109        | 99    |
| 281011 Cb#2 | 442                  | 7                     | 0.29              | 0.109                                            | 0.003        | 0.0165                                           | 0.0002       | 0.49             | 0.048                                             | 0.003        | 105                                 | 3          | 105                                 | 2          | 103                                  | 121        | 100   |
| 281011 Cb#2 | 554                  | 17                    | 0.22              | 0.212                                            | 0.006        | 0.0303                                           | 0.0004       | 0.56             | 0.051                                             | 0.002        | 195                                 | 5          | 193                                 | 3          | 229                                  | 99         | 99    |
| 281011 Cb#2 | 12681                | 280                   | 2.95              | 0.149                                            | 0.003        | 0.0221                                           | 0.0003       | 0.65             | 0.049                                             | 0.002        | 141                                 | 3          | 141                                 | 2          | 142                                  | 73         | 100   |
| 281011 Cb#2 | 352                  | 9                     | 0.34              | 0.174                                            | 0.005        | 0.0254                                           | 0.0004       | 0.49             | 0.050                                             | 0.003        | 163                                 | 5          | 162                                 | 2          | 179                                  | 120        | 99    |
| 281011 Cb#2 | 4151                 | 95                    | 8.05              | 0.156                                            | 0.004        | 0.0228                                           | 0.0003       | 0.66             | 0.050                                             | 0.002        | 147                                 | 3          | 146                                 | 2          | 176                                  | 78         | 99    |
| 281011 Cb#2 | 2832                 | 48                    | 0.12              | 0.112                                            | 0.003        | 0.0169                                           | 0.0002       | 0.61             | 0.048                                             | 0.002        | 108                                 | 3          | 108                                 | 2          | 112                                  | 87         | 100   |
| 281011 Cb#2 | 303                  | 8                     | 0.25              | 0.168                                            | 0.006        | 0.0248                                           | 0.0004       | 0.43             | 0.049                                             | 0.003        | 158                                 | 6          | 158                                 | 2          | 157                                  | 147        | 100   |

|             |       |     |      |       |       |        |        |      |       |       |      |    |      |    |      |     |     |
|-------------|-------|-----|------|-------|-------|--------|--------|------|-------|-------|------|----|------|----|------|-----|-----|
| 281011 Cb#2 | 525   | 8   | 0.20 | 0.099 | 0.003 | 0.0149 | 0.0002 | 0.46 | 0.048 | 0.003 | 96   | 3  | 95   | 1  | 111  | 133 | 99  |
| 281011 Cb#2 | 956   | 23  | 0.01 | 0.172 | 0.005 | 0.0241 | 0.0004 | 0.56 | 0.052 | 0.003 | 161  | 5  | 153  | 3  | 275  | 116 | 95  |
| 281011 Cb#2 | 1729  | 27  | 0.14 | 0.104 | 0.002 | 0.0155 | 0.0002 | 0.62 | 0.048 | 0.002 | 100  | 2  | 99   | 1  | 120  | 84  | 99  |
| 281011 Cb#2 | 8740  | 208 | 4.70 | 0.163 | 0.003 | 0.0239 | 0.0003 | 0.65 | 0.050 | 0.002 | 153  | 3  | 152  | 2  | 175  | 73  | 99  |
| 281011 Cb#2 | 332   | 8   | 0.29 | 0.173 | 0.005 | 0.0254 | 0.0004 | 0.52 | 0.049 | 0.002 | 162  | 5  | 162  | 2  | 162  | 112 | 100 |
| 281011 Cb#2 | 6851  | 152 | 3.28 | 0.151 | 0.003 | 0.0222 | 0.0003 | 0.61 | 0.049 | 0.002 | 143  | 3  | 141  | 2  | 166  | 81  | 99  |
| 281011 Cb#2 | 105   | 32  | 0.35 | 4.431 | 0.105 | 0.3055 | 0.0049 | 0.68 | 0.105 | 0.004 | 1718 | 41 | 1719 | 24 | 1718 | 63  | 100 |
| 281011 Cb#2 | 517   | 8   | 0.61 | 0.107 | 0.004 | 0.0162 | 0.0002 | 0.43 | 0.048 | 0.003 | 103  | 4  | 104  | 2  | 96   | 147 | 100 |
| 281011 Cb#2 | 644   | 11  | 0.34 | 0.110 | 0.003 | 0.0166 | 0.0002 | 0.49 | 0.048 | 0.003 | 106  | 3  | 106  | 2  | 104  | 120 | 100 |
| 281011 Cb#2 | 141   | 4   | 0.21 | 0.175 | 0.007 | 0.0257 | 0.0004 | 0.41 | 0.049 | 0.004 | 163  | 7  | 164  | 3  | 162  | 166 | 100 |
| 281011 Cb#2 | 3614  | 62  | 0.08 | 0.115 | 0.003 | 0.0172 | 0.0002 | 0.57 | 0.048 | 0.002 | 110  | 3  | 110  | 2  | 121  | 93  | 100 |
| 281011 Cb#2 | 286   | 5   | 0.24 | 0.108 | 0.004 | 0.0160 | 0.0003 | 0.43 | 0.049 | 0.004 | 104  | 4  | 102  | 2  | 150  | 167 | 98  |
| 281011 Cb#2 | 469   | 7   | 0.23 | 0.099 | 0.003 | 0.0149 | 0.0002 | 0.56 | 0.048 | 0.002 | 96   | 3  | 95   | 2  | 107  | 112 | 100 |
| 281011 Cb#2 | 249   | 4   | 0.23 | 0.104 | 0.005 | 0.0155 | 0.0003 | 0.39 | 0.049 | 0.004 | 100  | 5  | 99   | 2  | 129  | 196 | 99  |
| 281011 Cb#2 | 9837  | 233 | 6.03 | 0.161 | 0.003 | 0.0237 | 0.0003 | 0.63 | 0.049 | 0.002 | 152  | 3  | 151  | 2  | 170  | 77  | 99  |
| 281011 Cb#2 | 1172  | 17  | 0.28 | 0.100 | 0.003 | 0.0143 | 0.0002 | 0.54 | 0.051 | 0.003 | 97   | 3  | 92   | 1  | 232  | 120 | 94  |
| 281011 Cb#2 | 444   | 7   | 0.41 | 0.103 | 0.003 | 0.0155 | 0.0002 | 0.59 | 0.048 | 0.002 | 99   | 3  | 99   | 2  | 106  | 99  | 100 |
| 281011 Cb#2 | 538   | 9   | 0.44 | 0.106 | 0.003 | 0.0159 | 0.0002 | 0.54 | 0.048 | 0.002 | 102  | 3  | 102  | 2  | 105  | 109 | 100 |
| 281011 Cb#2 | 15779 | 234 | 3.11 | 0.099 | 0.002 | 0.0149 | 0.0002 | 0.65 | 0.048 | 0.002 | 96   | 2  | 95   | 1  | 112  | 73  | 99  |
| 281011 Cb#2 | 437   | 6   | 0.30 | 0.097 | 0.003 | 0.0144 | 0.0002 | 0.57 | 0.049 | 0.002 | 94   | 3  | 92   | 2  | 133  | 111 | 98  |
| 281011 Cb#2 | 316   | 5   | 0.33 | 0.103 | 0.004 | 0.0144 | 0.0003 | 0.53 | 0.052 | 0.003 | 100  | 3  | 92   | 2  | 283  | 130 | 92  |
| 281011 Cb#2 | 304   | 5   | 0.20 | 0.099 | 0.004 | 0.0150 | 0.0002 | 0.40 | 0.048 | 0.004 | 96   | 4  | 96   | 2  | 102  | 168 | 100 |
| 281011 Cb#2 | 172   | 3   | 0.32 | 0.102 | 0.004 | 0.0153 | 0.0003 | 0.57 | 0.049 | 0.003 | 99   | 3  | 98   | 2  | 126  | 130 | 99  |
| 281011 Cb#2 | 2659  | 40  | 0.20 | 0.104 | 0.003 | 0.0152 | 0.0002 | 0.57 | 0.050 | 0.002 | 101  | 3  | 97   | 1  | 195  | 95  | 96  |
| 281011 Cb#2 | 436   | 110 | 0.18 | 3.649 | 0.078 | 0.2532 | 0.0037 | 0.68 | 0.105 | 0.003 | 1560 | 33 | 1455 | 19 | 1706 | 58  | 93  |
| 281011 Cb#2 | 462   | 11  | 0.37 | 0.169 | 0.005 | 0.0248 | 0.0004 | 0.54 | 0.049 | 0.002 | 158  | 4  | 158  | 2  | 166  | 109 | 100 |
| 281011 Cb#2 | 230   | 4   | 0.28 | 0.104 | 0.004 | 0.0158 | 0.0003 | 0.44 | 0.048 | 0.003 | 101  | 4  | 101  | 2  | 103  | 166 | 100 |
| 281011 Cb#2 | 266   | 4   | 0.23 | 0.102 | 0.004 | 0.0152 | 0.0003 | 0.44 | 0.048 | 0.003 | 98   | 4  | 98   | 2  | 120  | 161 | 99  |
| 281011 Cb#2 | 449   | 6   | 0.23 | 0.092 | 0.004 | 0.0139 | 0.0002 | 0.44 | 0.048 | 0.003 | 89   | 4  | 89   | 1  | 98   | 167 | 100 |
| 281011 Cb#2 | 261   | 11  | 0.18 | 0.286 | 0.009 | 0.0403 | 0.0010 | 0.77 | 0.052 | 0.002 | 256  | 8  | 255  | 6  | 267  | 88  | 100 |
| 281011 Cb#2 | 534   | 9   | 0.11 | 0.107 | 0.003 | 0.0160 | 0.0002 | 0.62 | 0.048 | 0.002 | 103  | 2  | 102  | 2  | 123  | 88  | 99  |
| 281011 Cb#2 | 1328  | 21  | 0.23 | 0.106 | 0.002 | 0.0157 | 0.0002 | 0.63 | 0.049 | 0.002 | 102  | 2  | 101  | 1  | 134  | 79  | 99  |
| 281011 Cb#2 | 364   | 8   | 0.18 | 0.140 | 0.004 | 0.0208 | 0.0004 | 0.62 | 0.049 | 0.002 | 133  | 4  | 133  | 2  | 138  | 108 | 100 |
| 281011 Cb#2 | 290   | 7   | 0.25 | 0.171 | 0.005 | 0.0253 | 0.0004 | 0.52 | 0.049 | 0.003 | 161  | 5  | 161  | 3  | 156  | 121 | 100 |

|             |       |     |       |       |       |        |        |      |       |       |      |    |      |    |      |     |     |
|-------------|-------|-----|-------|-------|-------|--------|--------|------|-------|-------|------|----|------|----|------|-----|-----|
| 281011 Cb#2 | 1142  | 19  | 0.19  | 0.114 | 0.004 | 0.0170 | 0.0003 | 0.45 | 0.049 | 0.003 | 110  | 4  | 109  | 2  | 135  | 138 | 99  |
| 281011 Cb#2 | 94    | 1   | 0.28  | 0.104 | 0.006 | 0.0156 | 0.0003 | 0.36 | 0.048 | 0.005 | 101  | 6  | 100  | 2  | 114  | 244 | 99  |
| 281011 Cb#2 | 922   | 16  | 0.13  | 0.114 | 0.003 | 0.0171 | 0.0003 | 0.61 | 0.048 | 0.002 | 109  | 3  | 110  | 2  | 108  | 92  | 100 |
| 281011 Cb#2 | 17497 | 245 | 2.33  | 0.094 | 0.002 | 0.0140 | 0.0002 | 0.66 | 0.049 | 0.002 | 91   | 2  | 90   | 1  | 130  | 75  | 98  |
| 281011 Cb#2 | 6636  | 98  | 0.14  | 0.098 | 0.002 | 0.0147 | 0.0002 | 0.64 | 0.048 | 0.002 | 95   | 2  | 94   | 1  | 117  | 75  | 99  |
| 281011 Cb#2 | 2156  | 36  | 0.14  | 0.114 | 0.003 | 0.0167 | 0.0002 | 0.61 | 0.050 | 0.002 | 110  | 3  | 107  | 2  | 176  | 87  | 97  |
| 281011 Cb#2 | 608   | 9   | 0.28  | 0.103 | 0.003 | 0.0152 | 0.0002 | 0.55 | 0.049 | 0.002 | 99   | 3  | 97   | 2  | 155  | 111 | 98  |
| 281011 Cb#2 | 414   | 81  | 0.20  | 2.718 | 0.062 | 0.1947 | 0.0032 | 0.71 | 0.101 | 0.003 | 1333 | 31 | 1147 | 17 | 1647 | 59  | 86  |
| 281011 Cb#2 | 2575  | 40  | 15.40 | 0.108 | 0.003 | 0.0156 | 0.0002 | 0.57 | 0.050 | 0.002 | 104  | 3  | 100  | 1  | 204  | 102 | 96  |
| 281011 Cb#2 | 1011  | 16  | 0.18  | 0.107 | 0.003 | 0.0156 | 0.0003 | 0.52 | 0.050 | 0.003 | 103  | 3  | 100  | 2  | 173  | 125 | 97  |
| 281011 Cb#2 | 455   | 8   | 0.29  | 0.111 | 0.003 | 0.0167 | 0.0003 | 0.51 | 0.048 | 0.003 | 107  | 3  | 106  | 2  | 110  | 123 | 100 |
| 281011 Cb#2 | 652   | 10  | 0.32  | 0.103 | 0.003 | 0.0154 | 0.0003 | 0.56 | 0.048 | 0.002 | 99   | 3  | 99   | 2  | 119  | 116 | 99  |
| 281011 Cb#2 | 514   | 13  | 0.24  | 0.168 | 0.005 | 0.0246 | 0.0004 | 0.60 | 0.049 | 0.002 | 157  | 4  | 157  | 2  | 166  | 99  | 100 |
| 281011 Cb#2 | 397   | 10  | 0.14  | 0.176 | 0.005 | 0.0261 | 0.0004 | 0.52 | 0.049 | 0.003 | 164  | 5  | 166  | 3  | 140  | 123 | 101 |
| 281011 Cb#2 | 161   | 2   | 0.15  | 0.089 | 0.004 | 0.0135 | 0.0003 | 0.46 | 0.048 | 0.004 | 86   | 4  | 86   | 2  | 92   | 189 | 100 |
| 281011 Cb#2 | 717   | 18  | 0.03  | 0.179 | 0.006 | 0.0249 | 0.0005 | 0.57 | 0.052 | 0.003 | 167  | 5  | 158  | 3  | 298  | 121 | 95  |
| 281011 Cb#2 | 327   | 5   | 0.22  | 0.098 | 0.003 | 0.0147 | 0.0002 | 0.54 | 0.048 | 0.002 | 95   | 3  | 94   | 2  | 106  | 117 | 99  |
| 281011 Cb#2 | 528   | 8   | 0.21  | 0.106 | 0.003 | 0.0158 | 0.0002 | 0.57 | 0.049 | 0.002 | 103  | 3  | 101  | 2  | 131  | 102 | 99  |
| 281011 Cb#2 | 21732 | 320 | 2.00  | 0.098 | 0.002 | 0.0147 | 0.0002 | 0.65 | 0.048 | 0.002 | 95   | 2  | 94   | 1  | 114  | 74  | 99  |
| 281011 Cb#2 | 426   | 6   | 0.08  | 0.111 | 0.003 | 0.0149 | 0.0003 | 0.56 | 0.054 | 0.003 | 107  | 3  | 96   | 2  | 359  | 113 | 90  |
| 281011 Cb#2 | 438   | 7   | 0.24  | 0.104 | 0.003 | 0.0157 | 0.0003 | 0.50 | 0.048 | 0.003 | 100  | 3  | 100  | 2  | 107  | 133 | 100 |
| 281011 Cb#2 | 440   | 7   | 0.26  | 0.104 | 0.003 | 0.0155 | 0.0002 | 0.52 | 0.049 | 0.003 | 101  | 3  | 99   | 2  | 139  | 118 | 98  |
| 281011 Cb#2 | 11647 | 178 | 5.11  | 0.102 | 0.002 | 0.0153 | 0.0002 | 0.64 | 0.048 | 0.002 | 98   | 2  | 98   | 1  | 115  | 80  | 99  |
| 281011 Cb#2 | 491   | 13  | 0.24  | 0.176 | 0.005 | 0.0259 | 0.0004 | 0.60 | 0.049 | 0.002 | 165  | 4  | 165  | 3  | 164  | 99  | 100 |
| 281011 Cb#2 | 354   | 5   | 0.17  | 0.100 | 0.004 | 0.0143 | 0.0002 | 0.47 | 0.051 | 0.003 | 97   | 3  | 92   | 2  | 226  | 143 | 95  |
| 281011 Cb#2 | 244   | 75  | 0.32  | 4.499 | 0.096 | 0.3072 | 0.0043 | 0.66 | 0.106 | 0.003 | 1731 | 37 | 1727 | 21 | 1735 | 58  | 100 |
| 281011 Cb#2 | 1243  | 21  | 0.22  | 0.111 | 0.003 | 0.0166 | 0.0002 | 0.64 | 0.048 | 0.002 | 106  | 2  | 106  | 2  | 116  | 81  | 100 |

<sup>a</sup>U and Pb concentrations and Th/U ratios are calculated relative to GJ-1 reference zircon

<sup>b</sup>Corrected for background and within-run Pb/U fractionation and normalised to reference zircon GJ-1 (ID-TIMS values/measured value); <sup>207</sup>Pb/<sup>235</sup>U calculated using (<sup>207</sup>Pb/<sup>206</sup>Pb)/(<sup>238</sup>U/<sup>206</sup>Pb \* 1/137.88)

<sup>c</sup>Rho is the error correlation defined as the quotient of the propagated errors of the <sup>206</sup>Pb/<sup>238</sup>U and the <sup>207</sup>/<sup>235</sup>U ratio

<sup>d</sup>Quadratic addition of within-run errors (2 SD) and daily reproducibility of GJ-1 (2 SD)

<sup>e</sup>Corrected for mass-bias by normalising to GJ-1 reference zircon (~0.6 per atomic mass unit) and common Pb using the model Pb composition of Stacey & Kramers (1975)

Table S4C: U-Pb zircon data-231011L19#17.

|        |                      |                       |                                      |           |  | RATIOS                                           |                  |                                                  |                  |                  |                                                   |                  |  | AGES [Ma]                           |     |                                     |     |                                      |      |     | Conc. |
|--------|----------------------|-----------------------|--------------------------------------|-----------|--|--------------------------------------------------|------------------|--------------------------------------------------|------------------|------------------|---------------------------------------------------|------------------|--|-------------------------------------|-----|-------------------------------------|-----|--------------------------------------|------|-----|-------|
| Sample | U [ppm] <sup>a</sup> | Pb [ppm] <sup>a</sup> | <sup>206</sup> Pb/ <sup>204</sup> Pb | Th/U meas |  | <sup>207</sup> Pb/ <sup>235</sup> U <sup>b</sup> | 2 σ <sup>d</sup> | <sup>206</sup> Pb/ <sup>238</sup> U <sup>b</sup> | 2 σ <sup>d</sup> | rho <sup>c</sup> | <sup>207</sup> Pb/ <sup>206</sup> Pb <sup>e</sup> | 2 σ <sup>d</sup> |  | <sup>207</sup> Pb/ <sup>235</sup> U | 2 σ | <sup>206</sup> Pb/ <sup>238</sup> U | 2 σ | <sup>207</sup> Pb/ <sup>206</sup> Pb | 2 σ  | %   |       |
| PJM1   | 430                  | 84                    | 494545                               | 0.22      |  | 2.106                                            | 0.069            | 0.1944                                           | 0.0049           | 0.77             | 0.0786                                            | 0.0016           |  | 1151                                | 37  | 1145                                | 29  | 1162                                 | 41   | 99  |       |
| PJM1   | 227                  | 70                    | 6399                                 | 0.39      |  | 4.469                                            | 0.146            | 0.3071                                           | 0.0077           | 0.77             | 0.1055                                            | 0.0022           |  | 1725                                | 56  | 1726                                | 44  | 1724                                 | 38   | 100 |       |
| PJM1   | 56                   | 13                    | 20785                                | 0.90      |  | 2.802                                            | 0.106            | 0.2353                                           | 0.0061           | 0.68             | 0.0864                                            | 0.0024           |  | 1356                                | 51  | 1362                                | 35  | 1346                                 | 54   | 101 |       |
| PJM1   | 27                   | 9                     | 1803                                 | 1.37      |  | 5.646                                            | 0.228            | 0.3469                                           | 0.0092           | 0.66             | 0.1181                                            | 0.0036           |  | 1923                                | 78  | 1920                                | 51  | 1927                                 | 54   | 100 |       |
| PJM1   | 587                  | 3                     | 420                                  | 0.43      |  | 0.032                                            | 0.004            | 0.0049                                           | 0.0001           | 0.22             | 0.0477                                            | 0.0059           |  | 32                                  | 4   | 31                                  | 1   | 83                                   | 296  | 38  |       |
| PJM1   | 151                  | 4                     | 22700                                | 1.04      |  | 0.174                                            | 0.010            | 0.0255                                           | 0.0007           | 0.49             | 0.0496                                            | 0.0024           |  | 163                                 | 9   | 162                                 | 4   | 174                                  | 112  | 93  |       |
| PJM1   | 395                  | 120                   | 711022                               | 0.36      |  | 4.444                                            | 0.143            | 0.3049                                           | 0.0077           | 0.78             | 0.1057                                            | 0.0021           |  | 1721                                | 55  | 1716                                | 43  | 1726                                 | 37   | 99  |       |
| PJM1   | 312                  | 93                    | 548397                               | 0.28      |  | 4.233                                            | 0.137            | 0.2978                                           | 0.0075           | 0.78             | 0.1031                                            | 0.0021           |  | 1680                                | 54  | 1680                                | 42  | 1681                                 | 37   | 100 |       |
| PJM1   | 113                  | 28                    | 32709                                | 0.79      |  | 3.080                                            | 0.105            | 0.2481                                           | 0.0063           | 0.75             | 0.0900                                            | 0.0020           |  | 1428                                | 49  | 1429                                | 36  | 1426                                 | 43   | 100 |       |
| PJM1   | 149                  | 1                     | 5341                                 | 1.13      |  | 0.039                                            | 0.009            | 0.0061                                           | 0.0002           | 0.18             | 0.0468                                            | 0.0101           |  | 39                                  | 9   | 39                                  | 2   | 39                                   | 519  | 101 |       |
| PJM1   | 108                  | 20                    | 117213                               | 0.24      |  | 1.918                                            | 0.069            | 0.1835                                           | 0.0047           | 0.71             | 0.0758                                            | 0.0019           |  | 1088                                | 39  | 1086                                | 28  | 1091                                 | 50   | 100 |       |
| PJM1   | 467                  | 2                     | -3358                                | 0.43      |  | 0.031                                            | 0.003            | 0.0048                                           | 0.0001           | 0.33             | 0.0470                                            | 0.0039           |  | 31                                  | 3   | 31                                  | 1   | 51                                   | 197  | 60  |       |
| PJM1   | 162                  | 4                     | 25050                                | 0.81      |  | 0.179                                            | 0.010            | 0.0263                                           | 0.0007           | 0.48             | 0.0495                                            | 0.0024           |  | 167                                 | 9   | 167                                 | 4   | 172                                  | 113  | 97  |       |
| PJM1   | 131                  | 0                     | 99                                   | 0.47      |  | 0.011                                            | 0.005            | 0.0018                                           | 0.0001           | 0.09             | 0.0463                                            | 0.0223           |  | 11                                  | 6   | 11                                  | 1   | 15                                   | 1155 | 77  |       |
| PJM1   | 221                  | 116                   | 24604                                | 0.27      |  | 13.535                                           | 0.432            | 0.5238                                           | 0.0132           | 0.79             | 0.1874                                            | 0.0037           |  | 2718                                | 87  | 2715                                | 68  | 2719                                 | 32   | 100 |       |
| PJM1   | 247                  | 75                    | 19140                                | 0.58      |  | 4.381                                            | 0.144            | 0.3020                                           | 0.0076           | 0.77             | 0.1052                                            | 0.0022           |  | 1709                                | 56  | 1701                                | 43  | 1718                                 | 38   | 99  |       |
| PJM1   | 27                   | 5                     | 30403                                | 0.93      |  | 2.030                                            | 0.105            | 0.1906                                           | 0.0053           | 0.54             | 0.0772                                            | 0.0034           |  | 1126                                | 58  | 1125                                | 31  | 1127                                 | 87   | 100 |       |
| PJM1   | 849                  | 54                    | 316076                               | 0.28      |  | 0.478                                            | 0.016            | 0.0631                                           | 0.0016           | 0.75             | 0.0550                                            | 0.0012           |  | 397                                 | 13  | 395                                 | 10  | 411                                  | 50   | 96  |       |
| PJM1   | 410                  | 15                    | 90685                                | 0.31      |  | 0.263                                            | 0.010            | 0.0376                                           | 0.0010           | 0.67             | 0.0509                                            | 0.0015           |  | 237                                 | 9   | 238                                 | 6   | 236                                  | 66   | 101 |       |
| PJM1   | 426                  | 104                   | 614382                               | 0.66      |  | 3.015                                            | 0.098            | 0.2446                                           | 0.0062           | 0.78             | 0.0894                                            | 0.0018           |  | 1412                                | 46  | 1410                                | 36  | 1413                                 | 39   | 100 |       |
| PJM1   | 34                   | 6                     | 551                                  | 0.35      |  | 2.158                                            | 0.091            | 0.1861                                           | 0.0049           | 0.63             | 0.0841                                            | 0.0027           |  | 1168                                | 49  | 1100                                | 29  | 1295                                 | 63   | 85  |       |
| PJM1   | 172                  | 50                    | 6922                                 | 0.44      |  | 4.019                                            | 0.133            | 0.2887                                           | 0.0073           | 0.76             | 0.1010                                            | 0.0022           |  | 1638                                | 54  | 1635                                | 41  | 1642                                 | 40   | 100 |       |
| PJM1   | 871                  | 213                   | 16547                                | 0.31      |  | 3.000                                            | 0.097            | 0.2444                                           | 0.0062           | 0.78             | 0.0890                                            | 0.0018           |  | 1408                                | 45  | 1410                                | 36  | 1405                                 | 38   | 100 |       |
| PJM1   | 83                   | 1                     | 6227                                 | 0.74      |  | 0.083                                            | 0.011            | 0.0127                                           | 0.0004           | 0.27             | 0.0475                                            | 0.0058           |  | 81                                  | 10  | 81                                  | 3   | 75                                   | 292  | 108 |       |
| PJM1   | 269                  | 79                    | 468383                               | 0.44      |  | 4.186                                            | 0.136            | 0.2959                                           | 0.0075           | 0.78             | 0.1026                                            | 0.0021           |  | 1671                                | 54  | 1671                                | 42  | 1672                                 | 38   | 100 |       |
| PJM1   | 278                  | 80                    | 469971                               | 0.41      |  | 3.954                                            | 0.128            | 0.2866                                           | 0.0072           | 0.78             | 0.1001                                            | 0.0020           |  | 1625                                | 53  | 1625                                | 41  | 1625                                 | 38   | 100 |       |

|      |      |    |        |      |  |        |       |        |        |      |        |        |  |      |    |      |    |      |     |     |
|------|------|----|--------|------|--|--------|-------|--------|--------|------|--------|--------|--|------|----|------|----|------|-----|-----|
| PJM1 | 229  | 69 | 407794 | 0.33 |  | 4.361  | 0.143 | 0.3027 | 0.0077 | 0.77 | 0.1045 | 0.0022 |  | 1705 | 56 | 1705 | 43 | 1706 | 38  | 100 |
| PJM1 | 1109 | 4  | 881    | 0.81 |  | 0.026  | 0.002 | 0.0040 | 0.0001 | 0.46 | 0.0466 | 0.0027 |  | 26   | 2  | 26   | 1  | 28   | 137 | 92  |
| PJM1 | 87   | 22 | 2835   | 0.86 |  | 3.162  | 0.110 | 0.2519 | 0.0064 | 0.74 | 0.0910 | 0.0021 |  | 1448 | 50 | 1448 | 37 | 1447 | 45  | 100 |
| PJM1 | 210  | 38 | 3796   | 0.49 |  | 1.887  | 0.064 | 0.1817 | 0.0046 | 0.75 | 0.0753 | 0.0017 |  | 1076 | 36 | 1076 | 27 | 1077 | 45  | 100 |
| PJM1 | 265  | 79 | 36654  | 0.34 |  | 4.246  | 0.139 | 0.2981 | 0.0076 | 0.77 | 0.1033 | 0.0021 |  | 1683 | 55 | 1682 | 43 | 1684 | 38  | 100 |
| PJM1 | 40   | 12 | 71312  | 0.62 |  | 4.382  | 0.162 | 0.3027 | 0.0079 | 0.70 | 0.1050 | 0.0028 |  | 1709 | 63 | 1705 | 44 | 1714 | 48  | 99  |
| PJM1 | 119  | 23 | 4440   | 0.29 |  | 2.011  | 0.071 | 0.1897 | 0.0049 | 0.72 | 0.0769 | 0.0019 |  | 1119 | 40 | 1120 | 29 | 1118 | 49  | 100 |
| PJM1 | 311  | 18 | 103485 | 0.25 |  | 0.421  | 0.023 | 0.0567 | 0.0015 | 0.51 | 0.0539 | 0.0025 |  | 357  | 19 | 355  | 10 | 367  | 105 | 97  |
| PJM1 | 175  | 51 | 37833  | 0.36 |  | 4.104  | 0.138 | 0.2929 | 0.0075 | 0.76 | 0.1016 | 0.0022 |  | 1655 | 56 | 1656 | 42 | 1654 | 40  | 100 |
| PJM1 | 656  | 4  | 1009   | 0.58 |  | 0.036  | 0.003 | 0.0055 | 0.0002 | 0.35 | 0.0469 | 0.0041 |  | 36   | 3  | 36   | 1  | 43   | 210 | 84  |
| PJM1 | 56   | 17 | 97804  | 1.20 |  | 4.258  | 0.150 | 0.2990 | 0.0077 | 0.73 | 0.1033 | 0.0025 |  | 1685 | 60 | 1686 | 43 | 1684 | 45  | 100 |
| PJM1 | 315  | 95 | 556142 | 0.54 |  | 4.338  | 0.141 | 0.3002 | 0.0076 | 0.78 | 0.1048 | 0.0021 |  | 1701 | 55 | 1692 | 43 | 1711 | 37  | 99  |
| PJM1 | 77   | 23 | 9072   | 0.63 |  | 4.162  | 0.147 | 0.2947 | 0.0076 | 0.73 | 0.1024 | 0.0025 |  | 1667 | 59 | 1665 | 43 | 1669 | 45  | 100 |
| PJM1 | 23   | 7  | 39810  | 0.71 |  | 4.199  | 0.182 | 0.2953 | 0.0080 | 0.62 | 0.1032 | 0.0035 |  | 1674 | 73 | 1668 | 45 | 1682 | 63  | 99  |
| PJM1 | 88   | 22 | 126869 | 0.60 |  | 3.034  | 0.110 | 0.2452 | 0.0063 | 0.71 | 0.0897 | 0.0023 |  | 1416 | 52 | 1414 | 37 | 1420 | 49  | 100 |
| PJM1 | 79   | 44 | 255796 | 1.48 |  | 15.134 | 0.498 | 0.5493 | 0.0140 | 0.78 | 0.1998 | 0.0041 |  | 2824 | 93 | 2822 | 72 | 2825 | 34  | 100 |
| PJM1 | 130  | 25 | 8396   | 0.49 |  | 2.024  | 0.071 | 0.1899 | 0.0049 | 0.73 | 0.0773 | 0.0019 |  | 1124 | 40 | 1121 | 29 | 1130 | 48  | 99  |
| PJM1 | 136  | 16 | 12907  | 0.62 |  | 1.019  | 0.038 | 0.1165 | 0.0030 | 0.68 | 0.0635 | 0.0017 |  | 713  | 27 | 710  | 18 | 724  | 58  | 98  |
| PJM1 | 1158 | 5  | 5125   | 0.55 |  | 0.027  | 0.002 | 0.0042 | 0.0001 | 0.39 | 0.0465 | 0.0031 |  | 27   | 2  | 27   | 1  | 23   | 162 | 116 |
| PJM1 | 73   | 13 | 1358   | 0.49 |  | 1.842  | 0.073 | 0.1789 | 0.0047 | 0.66 | 0.0747 | 0.0022 |  | 1061 | 42 | 1061 | 28 | 1060 | 60  | 100 |
| PJM1 | 110  | 36 | 208433 | 0.71 |  | 4.959  | 0.168 | 0.3241 | 0.0083 | 0.76 | 0.1110 | 0.0025 |  | 1812 | 61 | 1810 | 46 | 1815 | 40  | 100 |
| PJM1 | 43   | 8  | 12607  | 0.58 |  | 2.088  | 0.097 | 0.1945 | 0.0053 | 0.58 | 0.0779 | 0.0029 |  | 1145 | 53 | 1146 | 31 | 1143 | 75  | 100 |
| PJM1 | 67   | 16 | 977    | 0.54 |  | 3.488  | 0.129 | 0.2396 | 0.0062 | 0.70 | 0.1056 | 0.0028 |  | 1525 | 56 | 1384 | 36 | 1725 | 48  | 80  |
| PJM1 | 104  | 1  | 7386   | 0.50 |  | 0.079  | 0.015 | 0.0121 | 0.0006 | 0.25 | 0.0474 | 0.0086 |  | 77   | 14 | 77   | 4  | 70   | 430 | 111 |
| PJM1 | 75   | 14 | 84750  | 0.43 |  | 2.071  | 0.077 | 0.1931 | 0.0050 | 0.70 | 0.0778 | 0.0021 |  | 1139 | 42 | 1138 | 29 | 1141 | 53  | 100 |
| PJM1 | 143  | 3  | 20215  | 0.59 |  | 0.163  | 0.016 | 0.0242 | 0.0008 | 0.34 | 0.0490 | 0.0044 |  | 153  | 15 | 154  | 5  | 147  | 210 | 105 |
| PJM1 | 206  | 35 | 202524 | 0.21 |  | 1.673  | 0.061 | 0.1678 | 0.0043 | 0.71 | 0.0723 | 0.0019 |  | 998  | 36 | 1000 | 26 | 995  | 52  | 100 |
| PJM1 | 66   | 20 | 114352 | 0.85 |  | 4.200  | 0.147 | 0.2945 | 0.0076 | 0.73 | 0.1034 | 0.0025 |  | 1674 | 59 | 1664 | 43 | 1687 | 44  | 99  |
| PJM1 | 1106 | 36 | 13117  | 2.95 |  | 0.228  | 0.009 | 0.0328 | 0.0008 | 0.67 | 0.0504 | 0.0014 |  | 209  | 8  | 208  | 5  | 213  | 65  | 97  |

|      |     |     |         |      |  |        |       |        |        |      |        |        |  |      |     |      |    |      |     |     |
|------|-----|-----|---------|------|--|--------|-------|--------|--------|------|--------|--------|--|------|-----|------|----|------|-----|-----|
| PJM1 | 395 | 11  | 62115   | 0.60 |  | 0.184  | 0.008 | 0.0268 | 0.0007 | 0.62 | 0.0498 | 0.0016 |  | 172  | 7   | 171  | 4  | 186  | 77  | 92  |
| PJM1 | 71  | 21  | 140389  | 0.92 |  | 4.266  | 0.148 | 0.2991 | 0.0077 | 0.74 | 0.1034 | 0.0024 |  | 1687 | 59  | 1687 | 43 | 1687 | 43  | 100 |
| PJM1 | 33  | 7   | 42917   | 0.77 |  | 2.873  | 0.116 | 0.2201 | 0.0058 | 0.66 | 0.0947 | 0.0029 |  | 1375 | 55  | 1282 | 34 | 1521 | 57  | 84  |
| PJM1 | 156 | 50  | 295341  | 0.26 |  | 4.941  | 0.164 | 0.3241 | 0.0083 | 0.77 | 0.1106 | 0.0024 |  | 1809 | 60  | 1810 | 46 | 1808 | 39  | 100 |
| PJM1 | 496 | 13  | 77278   | 1.09 |  | 0.180  | 0.007 | 0.0266 | 0.0007 | 0.64 | 0.0491 | 0.0015 |  | 168  | 7   | 169  | 4  | 154  | 72  | 110 |
| PJM1 | 230 | 4   | 611     | 0.56 |  | 0.107  | 0.006 | 0.0155 | 0.0004 | 0.46 | 0.0503 | 0.0026 |  | 103  | 6   | 99   | 3  | 207  | 121 | 48  |
| PJM1 | 522 | 84  | 7201    | 0.30 |  | 1.698  | 0.056 | 0.1608 | 0.0041 | 0.77 | 0.0766 | 0.0016 |  | 1008 | 33  | 961  | 25 | 1111 | 42  | 86  |
| PJM1 | 839 | 255 | 1488946 | 0.25 |  | 4.395  | 0.143 | 0.3035 | 0.0077 | 0.78 | 0.1051 | 0.0021 |  | 1711 | 56  | 1708 | 43 | 1715 | 37  | 100 |
| PJM1 | 464 | 7   | 820     | 0.30 |  | 0.099  | 0.005 | 0.0150 | 0.0004 | 0.57 | 0.0479 | 0.0018 |  | 96   | 4   | 96   | 3  | 92   | 90  | 104 |
| PJM1 | 159 | 30  | 105641  | 0.46 |  | 2.022  | 0.075 | 0.1901 | 0.0049 | 0.70 | 0.0771 | 0.0021 |  | 1123 | 42  | 1122 | 29 | 1125 | 53  | 100 |
| PJM1 | 697 | 120 | 699219  | 0.12 |  | 1.744  | 0.058 | 0.1717 | 0.0044 | 0.77 | 0.0737 | 0.0015 |  | 1025 | 34  | 1021 | 26 | 1033 | 42  | 99  |
| PJM1 | 169 | 43  | 6407    | 0.01 |  | 3.252  | 0.110 | 0.2548 | 0.0065 | 0.76 | 0.0926 | 0.0020 |  | 1470 | 50  | 1463 | 37 | 1479 | 42  | 99  |
| PJM1 | 482 | 30  | 175510  | 0.04 |  | 0.466  | 0.019 | 0.0623 | 0.0016 | 0.63 | 0.0543 | 0.0017 |  | 389  | 16  | 390  | 10 | 383  | 71  | 102 |
| PJM1 | 75  | 14  | 4746    | 0.73 |  | 2.070  | 0.082 | 0.1923 | 0.0050 | 0.66 | 0.0780 | 0.0023 |  | 1139 | 45  | 1134 | 30 | 1148 | 59  | 99  |
| PJM1 | 702 | 354 | 2069052 | 0.44 |  | 13.395 | 0.440 | 0.5044 | 0.0129 | 0.78 | 0.1926 | 0.0040 |  | 2708 | 89  | 2633 | 67 | 2765 | 34  | 95  |
| PJM1 | 209 | 40  | 232355  | 0.43 |  | 2.045  | 0.076 | 0.1900 | 0.0049 | 0.70 | 0.0780 | 0.0021 |  | 1130 | 42  | 1121 | 29 | 1148 | 52  | 98  |
| PJM1 | 100 | 30  | 174096  | 0.97 |  | 4.233  | 0.145 | 0.2977 | 0.0077 | 0.75 | 0.1031 | 0.0023 |  | 1681 | 58  | 1680 | 43 | 1681 | 42  | 100 |
| PJM1 | 156 | 47  | 272641  | 0.46 |  | 4.277  | 0.147 | 0.2988 | 0.0077 | 0.75 | 0.1038 | 0.0024 |  | 1689 | 58  | 1685 | 43 | 1693 | 42  | 100 |
| PJM1 | 207 | 53  | 309964  | 0.47 |  | 3.261  | 0.110 | 0.2563 | 0.0066 | 0.76 | 0.0923 | 0.0020 |  | 1472 | 50  | 1471 | 38 | 1473 | 42  | 100 |
| PJM1 | 205 | 1   | 161     | 0.51 |  | 0.034  | 0.007 | 0.0052 | 0.0002 | 0.16 | 0.0472 | 0.0090 |  | 34   | 7   | 34   | 1  | 59   | 454 | 57  |
| PJM1 | 226 | 1   | 7028    | 0.48 |  | 0.035  | 0.006 | 0.0053 | 0.0002 | 0.18 | 0.0470 | 0.0077 |  | 35   | 6   | 34   | 1  | 49   | 389 | 70  |
| PJM1 | 142 | 36  | 5397    | 0.33 |  | 3.156  | 0.113 | 0.2516 | 0.0065 | 0.72 | 0.0910 | 0.0023 |  | 1446 | 52  | 1447 | 37 | 1446 | 47  | 100 |
| PJM1 | 364 | 113 | 657076  | 0.26 |  | 4.545  | 0.150 | 0.3093 | 0.0079 | 0.77 | 0.1066 | 0.0022 |  | 1739 | 57  | 1737 | 44 | 1741 | 38  | 100 |
| PJM1 | 356 | 87  | 28733   | 1.05 |  | 2.996  | 0.099 | 0.2444 | 0.0062 | 0.77 | 0.0889 | 0.0019 |  | 1407 | 47  | 1410 | 36 | 1402 | 41  | 101 |
| PJM1 | 190 | 1   | 144     | 0.62 |  | 0.029  | 0.007 | 0.0045 | 0.0001 | 0.13 | 0.0465 | 0.0112 |  | 29   | 7   | 29   | 1  | 22   | 579 | 132 |
| PJM1 | 38  | 22  | 125956  | 1.00 |  | 16.769 | 0.577 | 0.5730 | 0.0149 | 0.76 | 0.2122 | 0.0048 |  | 2922 | 101 | 2920 | 76 | 2923 | 36  | 100 |
| PJM1 | 206 | 1   | 6960    | 1.06 |  | 0.037  | 0.011 | 0.0058 | 0.0002 | 0.11 | 0.0467 | 0.0138 |  | 37   | 11  | 37   | 1  | 35   | 706 | 106 |
| PJM1 | 341 | 3   | 659     | 0.52 |  | 0.048  | 0.006 | 0.0074 | 0.0002 | 0.25 | 0.0468 | 0.0055 |  | 48   | 6   | 48   | 1  | 41   | 280 | 116 |
| PJM1 | 309 | 5   | 825     | 0.43 |  | 0.104  | 0.006 | 0.0157 | 0.0004 | 0.45 | 0.0482 | 0.0025 |  | 101  | 6   | 101  | 3  | 107  | 125 | 94  |

|      |      |     |        |      |  |       |       |        |        |      |        |        |  |      |    |      |    |      |      |     |
|------|------|-----|--------|------|--|-------|-------|--------|--------|------|--------|--------|--|------|----|------|----|------|------|-----|
| PJM1 | 425  | 5   | 718    | 2.86 |  | 0.080 | 0.004 | 0.0121 | 0.0003 | 0.51 | 0.0476 | 0.0021 |  | 78   | 4  | 78   | 2  | 80   | 105  | 97  |
| PJM1 | 262  | 18  | 10661  | 0.76 |  | 0.531 | 0.022 | 0.0686 | 0.0018 | 0.65 | 0.0561 | 0.0017 |  | 432  | 18 | 428  | 11 | 457  | 69   | 94  |
| PJM1 | 146  | 44  | 257495 | 0.44 |  | 4.418 | 0.151 | 0.3035 | 0.0078 | 0.76 | 0.1056 | 0.0024 |  | 1716 | 59 | 1709 | 44 | 1724 | 41   | 99  |
| PJM1 | 254  | 4   | 22403  | 0.48 |  | 0.100 | 0.009 | 0.0151 | 0.0004 | 0.30 | 0.0480 | 0.0043 |  | 97   | 9  | 97   | 3  | 100  | 210  | 97  |
| PJM1 | 267  | 1   | 354    | 0.39 |  | 0.034 | 0.011 | 0.0051 | 0.0002 | 0.10 | 0.0476 | 0.0155 |  | 33   | 11 | 33   | 1  | 78   | 775  | 42  |
| PJM1 | 146  | 1   | 205    | 0.97 |  | 0.070 | 0.041 | 0.0062 | 0.0002 | 0.06 | 0.0824 | 0.0476 |  | 69   | 40 | 40   | 1  | 1255 | 1130 | 3   |
| PJM1 | 109  | 32  | 10221  | 0.84 |  | 4.145 | 0.143 | 0.2922 | 0.0075 | 0.75 | 0.1029 | 0.0024 |  | 1663 | 57 | 1652 | 43 | 1677 | 42   | 99  |
| PJM1 | 175  | 1   | 1837   | 0.48 |  | 0.033 | 0.006 | 0.0051 | 0.0002 | 0.17 | 0.0471 | 0.0088 |  | 33   | 6  | 33   | 1  | 52   | 447  | 63  |
| PJM1 | 1786 | 530 | 144924 | 0.04 |  | 4.204 | 0.139 | 0.2967 | 0.0076 | 0.78 | 0.1028 | 0.0021 |  | 1675 | 55 | 1675 | 43 | 1675 | 38   | 100 |
| PJM1 | 781  | 18  | 16384  | 1.19 |  | 0.154 | 0.006 | 0.0228 | 0.0006 | 0.68 | 0.0489 | 0.0014 |  | 145  | 6  | 146  | 4  | 141  | 67   | 103 |
| PJM1 | 276  | 82  | 12907  | 0.80 |  | 4.252 | 0.143 | 0.2975 | 0.0077 | 0.76 | 0.1037 | 0.0023 |  | 1684 | 57 | 1679 | 43 | 1691 | 40   | 99  |
| PJM1 | 226  | 2   | 9073   | 0.48 |  | 0.046 | 0.009 | 0.0069 | 0.0002 | 0.16 | 0.0485 | 0.0088 |  | 46   | 8  | 44   | 1  | 125  | 427  | 36  |
| PJM1 | 216  | 6   | 599    | 1.15 |  | 0.177 | 0.014 | 0.0261 | 0.0008 | 0.39 | 0.0493 | 0.0035 |  | 166  | 13 | 166  | 5  | 160  | 164  | 104 |
| PJM1 | 544  | 150 | 1901   | 0.24 |  | 4.906 | 0.162 | 0.2757 | 0.0071 | 0.77 | 0.1291 | 0.0027 |  | 1803 | 60 | 1570 | 40 | 2085 | 37   | 75  |
| PJM1 | 257  | 49  | 29640  | 0.39 |  | 2.037 | 0.072 | 0.1914 | 0.0050 | 0.73 | 0.0772 | 0.0019 |  | 1128 | 40 | 1129 | 29 | 1126 | 48   | 100 |
| PJM1 | 286  | 88  | 6734   | 0.53 |  | 5.025 | 0.182 | 0.3068 | 0.0080 | 0.72 | 0.1188 | 0.0030 |  | 1823 | 66 | 1725 | 45 | 1938 | 45   | 89  |
| PJM1 | 172  | 4   | 22765  | 0.79 |  | 0.154 | 0.011 | 0.0228 | 0.0007 | 0.40 | 0.0492 | 0.0033 |  | 146  | 11 | 145  | 4  | 155  | 159  | 94  |
| PJM1 | 109  | 27  | 5945   | 0.57 |  | 3.101 | 0.111 | 0.2480 | 0.0064 | 0.72 | 0.0907 | 0.0022 |  | 1433 | 51 | 1428 | 37 | 1440 | 47   | 99  |
| PJM1 | 152  | 47  | 270131 | 0.28 |  | 4.488 | 0.155 | 0.3064 | 0.0079 | 0.75 | 0.1063 | 0.0024 |  | 1729 | 60 | 1723 | 45 | 1736 | 42   | 99  |
| PJM1 | 445  | 132 | 13462  | 0.50 |  | 4.214 | 0.141 | 0.2958 | 0.0076 | 0.77 | 0.1034 | 0.0022 |  | 1677 | 56 | 1670 | 43 | 1685 | 39   | 99  |
| PJM1 | 70   | 20  | 2526   | 0.69 |  | 4.138 | 0.149 | 0.2935 | 0.0077 | 0.73 | 0.1023 | 0.0025 |  | 1662 | 60 | 1659 | 43 | 1666 | 46   | 100 |
| PJM1 | 147  | 36  | 210386 | 0.63 |  | 3.058 | 0.106 | 0.2469 | 0.0064 | 0.74 | 0.0898 | 0.0021 |  | 1422 | 49 | 1422 | 37 | 1422 | 44   | 100 |
| PJM1 | 853  | 29  | 55870  | 0.34 |  | 0.239 | 0.009 | 0.0343 | 0.0009 | 0.70 | 0.0506 | 0.0013 |  | 218  | 8  | 218  | 6  | 220  | 60   | 99  |
| PJM1 | 55   | 14  | 2474   | 0.16 |  | 3.142 | 0.118 | 0.2513 | 0.0066 | 0.70 | 0.0907 | 0.0024 |  | 1443 | 54 | 1445 | 38 | 1439 | 51   | 100 |

<sup>a</sup>U and Pb concentrations and Th/U ratios are calculated relative to GJ-1 reference zircon

<sup>b</sup>Corrected for background and within-run Pb/U fractionation and normalised to reference zircon GJ-1 (ID-TIMS values/measured value); <sup>207</sup>Pb/<sup>235</sup>U calculated using (<sup>207</sup>Pb/<sup>206</sup>Pb)/(<sup>238</sup>U/<sup>206</sup>Pb \* 1/137.88)

<sup>c</sup>Rho is the error correlation defined as the quotient of the propagated errors of the <sup>206</sup>Pb/<sup>238</sup>U and the <sup>207</sup>/<sup>235</sup>U ratio

<sup>d</sup>Quadratic addition of within-run errors (2 SD) and daily reproducibility of GJ-1 (2 SD)

<sup>e</sup>Corrected for mass-bias by normalising to GJ-1 reference zircon (~0.6 per atomic mass unit) and common Pb using the model Pb composition of Stacey & Kramers (1975)

Table S4D: U-Pb zircon data-231011L19#18.

|        |                      |                       |                                      |                   |  | RATIOS                                           |                  |                                                  |                  |                  |                                                   |                  |  | AGES [Ma]                           |     |                                     |     |                                      |     | Conc. |
|--------|----------------------|-----------------------|--------------------------------------|-------------------|--|--------------------------------------------------|------------------|--------------------------------------------------|------------------|------------------|---------------------------------------------------|------------------|--|-------------------------------------|-----|-------------------------------------|-----|--------------------------------------|-----|-------|
| Sample | U [ppm] <sup>a</sup> | Pb [ppm] <sup>a</sup> | <sup>206</sup> Pb/ <sup>204</sup> Pb | Th/U <sup>a</sup> |  | <sup>207</sup> Pb/ <sup>235</sup> U <sup>b</sup> | 2 σ <sup>d</sup> | <sup>206</sup> Pb/ <sup>238</sup> U <sup>b</sup> | 2 σ <sup>d</sup> | rho <sup>c</sup> | <sup>207</sup> Pb/ <sup>206</sup> Pb <sup>e</sup> | 2 σ <sup>d</sup> |  | <sup>207</sup> Pb/ <sup>235</sup> U | 2 σ | <sup>206</sup> Pb/ <sup>238</sup> U | 2 σ | <sup>207</sup> Pb/ <sup>206</sup> Pb | 2 σ | %     |
| PJM2   | 301                  | 8                     | 45545                                | 0.28              |  | 0.180                                            | 0.008            | 0.0263                                           | 0.0007           | 0.59             | 0.0497                                            | 0.0018           |  | 168                                 | 8   | 167                                 | 4   | 181                                  | 85  | 93    |
| PJM2   | 123                  | 3                     | 260                                  | 0.30              |  | 0.177                                            | 0.012            | 0.0259                                           | 0.0007           | 0.42             | 0.0495                                            | 0.0030           |  | 165                                 | 11  | 165                                 | 5   | 172                                  | 140 | 96    |
| PJM2   | 321                  | 106                   | 611682                               | 0.55              |  | 5.163                                            | 0.168            | 0.3312                                           | 0.0085           | 0.79             | 0.1131                                            | 0.0023           |  | 1847                                | 60  | 1844                                | 47  | 1849                                 | 36  | 100   |
| PJM2   | 73                   | 18                    | 104905                               | 1.04              |  | 3.120                                            | 0.119            | 0.2506                                           | 0.0066           | 0.69             | 0.0903                                            | 0.0025           |  | 1438                                | 55  | 1441                                | 38  | 1432                                 | 52  | 101   |
| PJM2   | 216                  | 6                     | 2773                                 | 0.23              |  | 0.174                                            | 0.010            | 0.0256                                           | 0.0007           | 0.44             | 0.0493                                            | 0.0026           |  | 163                                 | 10  | 163                                 | 4   | 164                                  | 125 | 100   |
| PJM2   | 191                  | 5                     | 976                                  | 0.31              |  | 0.180                                            | 0.013            | 0.0263                                           | 0.0007           | 0.37             | 0.0495                                            | 0.0034           |  | 168                                 | 13  | 168                                 | 5   | 170                                  | 162 | 98    |
| PJM2   | 220                  | 6                     | 606                                  | 0.39              |  | 0.177                                            | 0.014            | 0.0260                                           | 0.0007           | 0.34             | 0.0494                                            | 0.0038           |  | 166                                 | 13  | 165                                 | 5   | 168                                  | 178 | 98    |
| PJM2   | 212                  | 6                     | 1493                                 | 0.35              |  | 0.181                                            | 0.009            | 0.0266                                           | 0.0007           | 0.54             | 0.0492                                            | 0.0021           |  | 169                                 | 8   | 169                                 | 5   | 159                                  | 98  | 107   |
| PJM2   | 213                  | 38                    | 220759                               | 0.43              |  | 1.949                                            | 0.066            | 0.1798                                           | 0.0046           | 0.76             | 0.0786                                            | 0.0017           |  | 1098                                | 37  | 1066                                | 28  | 1162                                 | 44  | 92    |
| PJM2   | 176                  | 5                     | 536                                  | 0.26              |  | 0.189                                            | 0.010            | 0.0260                                           | 0.0007           | 0.53             | 0.0526                                            | 0.0023           |  | 175                                 | 9   | 166                                 | 4   | 309                                  | 99  | 54    |
| PJM2   | 352                  | 63                    | 29201                                | 1.60              |  | 2.076                                            | 0.069            | 0.1801                                           | 0.0046           | 0.78             | 0.0836                                            | 0.0017           |  | 1141                                | 38  | 1068                                | 28  | 1283                                 | 41  | 83    |
| PJM2   | 482                  | 12                    | 3110                                 | 0.16              |  | 0.172                                            | 0.007            | 0.0251                                           | 0.0007           | 0.63             | 0.0496                                            | 0.0016           |  | 161                                 | 7   | 160                                 | 4   | 178                                  | 75  | 90    |
| PJM2   | 128                  | 3                     | 19386                                | 0.34              |  | 0.180                                            | 0.016            | 0.0264                                           | 0.0007           | 0.31             | 0.0495                                            | 0.0042           |  | 168                                 | 15  | 168                                 | 5   | 173                                  | 198 | 97    |
| PJM2   | 751                  | 228                   | 106479                               | 0.43              |  | 4.404                                            | 0.143            | 0.3038                                           | 0.0078           | 0.79             | 0.1052                                            | 0.0021           |  | 1713                                | 55  | 1710                                | 44  | 1717                                 | 36  | 100   |
| PJM2   | 100                  | 30                    | 5636                                 | 1.05              |  | 4.236                                            | 0.156            | 0.2991                                           | 0.0079           | 0.71             | 0.1027                                            | 0.0027           |  | 1681                                | 62  | 1687                                | 44  | 1674                                 | 48  | 101   |
| PJM2   | 1119                 | 18                    | 16373                                | 0.18              |  | 0.104                                            | 0.004            | 0.0157                                           | 0.0004           | 0.67             | 0.0481                                            | 0.0014           |  | 101                                 | 4   | 101                                 | 3   | 105                                  | 67  | 96    |
| PJM2   | 144                  | 2                     | 12632                                | 0.38              |  | 0.102                                            | 0.018            | 0.0153                                           | 0.0004           | 0.16             | 0.0486                                            | 0.0084           |  | 99                                  | 17  | 98                                  | 3   | 127                                  | 408 | 77    |
|        |                      |                       |                                      |                   |  |                                                  |                  |                                                  |                  |                  |                                                   |                  |  |                                     |     |                                     |     |                                      |     |       |
| PJM2   | 97                   | 3                     | 14581                                | 0.28              |  | 0.180                                            | 0.031            | 0.0262                                           | 0.0007           | 0.16             | 0.0499                                            | 0.0086           |  | 168                                 | 29  | 167                                 | 5   | 188                                  | 401 | 89    |
| PJM2   | 183                  | 3                     | 551                                  | 0.11              |  | 0.103                                            | 0.007            | 0.0156                                           | 0.0004           | 0.45             | 0.0480                                            | 0.0027           |  | 100                                 | 6   | 100                                 | 3   | 100                                  | 134 | 100   |
| PJM2   | 409                  | 7                     | 2973                                 | 0.24              |  | 0.106                                            | 0.008            | 0.0160                                           | 0.0004           | 0.35             | 0.0482                                            | 0.0034           |  | 102                                 | 8   | 102                                 | 3   | 108                                  | 167 | 94    |
| PJM2   | 196                  | 5                     | 29257                                | 0.36              |  | 0.176                                            | 0.010            | 0.0260                                           | 0.0007           | 0.47             | 0.0492                                            | 0.0025           |  | 165                                 | 10  | 165                                 | 4   | 158                                  | 120 | 104   |
| PJM2   | 8756                 | 201                   | 14807                                | 7.06              |  | 0.156                                            | 0.005            | 0.0229                                           | 0.0006           | 0.72             | 0.0493                                            | 0.0012           |  | 147                                 | 5   | 146                                 | 4   | 164                                  | 57  | 89    |
| PJM2   | 236                  | 6                     | 922                                  | 0.24              |  | 0.180                                            | 0.010            | 0.0265                                           | 0.0007           | 0.51             | 0.0493                                            | 0.0023           |  | 168                                 | 9   | 169                                 | 5   | 164                                  | 107 | 103   |
| PJM2   | 179                  | 5                     | 26983                                | 0.33              |  | 0.178                                            | 0.009            | 0.0263                                           | 0.0007           | 0.52             | 0.0492                                            | 0.0022           |  | 167                                 | 9   | 167                                 | 5   | 158                                  | 106 | 106   |
| PJM2   | 1741                 | 45                    | 256897                               | 0.19              |  | 0.175                                            | 0.006            | 0.0257                                           | 0.0007           | 0.74             | 0.0494                                            | 0.0012           |  | 164                                 | 6   | 164                                 | 4   | 168                                  | 55  | 98    |



|      |       |     |        |      |  |       |       |        |        |      |        |        |  |      |    |      |    |      |     |     |
|------|-------|-----|--------|------|--|-------|-------|--------|--------|------|--------|--------|--|------|----|------|----|------|-----|-----|
| PJM2 | 169   | 3   | 14627  | 0.36 |  | 0.100 | 0.009 | 0.0151 | 0.0004 | 0.30 | 0.0480 | 0.0043 |  | 97   | 9  | 97   | 3  | 100  | 213 | 96  |
| PJM2 | 230   | 6   | 1069   | 0.35 |  | 0.178 | 0.013 | 0.0260 | 0.0007 | 0.38 | 0.0495 | 0.0032 |  | 166  | 12 | 166  | 4  | 173  | 153 | 96  |
| PJM2 | 179   | 53  | 305025 | 0.50 |  | 4.206 | 0.141 | 0.2968 | 0.0077 | 0.77 | 0.1028 | 0.0022 |  | 1675 | 56 | 1675 | 43 | 1675 | 40  | 100 |
| PJM2 | 236   | 70  | 12565  | 0.17 |  | 4.223 | 0.140 | 0.2969 | 0.0077 | 0.78 | 0.1032 | 0.0021 |  | 1679 | 56 | 1676 | 43 | 1682 | 38  | 100 |
| PJM2 | 157   | 2   | 885    | 0.45 |  | 0.103 | 0.009 | 0.0155 | 0.0004 | 0.32 | 0.0480 | 0.0040 |  | 99   | 9  | 99   | 3  | 97   | 195 | 102 |
| PJM2 | 291   | 5   | 25893  | 0.45 |  | 0.103 | 0.005 | 0.0155 | 0.0004 | 0.51 | 0.0479 | 0.0022 |  | 99   | 5  | 99   | 3  | 96   | 109 | 104 |
| PJM2 | 176   | 5   | 25790  | 0.25 |  | 0.174 | 0.014 | 0.0256 | 0.0007 | 0.34 | 0.0494 | 0.0038 |  | 163  | 13 | 163  | 4  | 168  | 179 | 97  |
| PJM2 | 119   | 22  | 14884  | 0.60 |  | 1.859 | 0.066 | 0.1809 | 0.0047 | 0.73 | 0.0745 | 0.0018 |  | 1066 | 38 | 1072 | 28 | 1055 | 49  | 102 |
| PJM2 | 272   | 77  | 17136  | 0.35 |  | 3.936 | 0.130 | 0.2839 | 0.0073 | 0.78 | 0.1006 | 0.0021 |  | 1621 | 54 | 1611 | 42 | 1634 | 38  | 99  |
| PJM2 | 13208 | 181 | 9523   | 4.63 |  | 0.091 | 0.003 | 0.0137 | 0.0004 | 0.71 | 0.0483 | 0.0013 |  | 89   | 3  | 88   | 2  | 115  | 62  | 76  |
| PJM2 | 19553 | 268 | 25421  | 3.02 |  | 0.091 | 0.003 | 0.0137 | 0.0004 | 0.80 | 0.0481 | 0.0010 |  | 88   | 3  | 88   | 2  | 106  | 47  | 83  |
| PJM2 | 147   | 2   | 330    | 0.38 |  | 0.101 | 0.011 | 0.0153 | 0.0004 | 0.26 | 0.0482 | 0.0052 |  | 98   | 11 | 98   | 3  | 109  | 253 | 90  |
| PJM2 | 204   | 7   | 37809  | 0.43 |  | 0.224 | 0.012 | 0.0323 | 0.0009 | 0.52 | 0.0503 | 0.0022 |  | 205  | 11 | 205  | 6  | 207  | 103 | 99  |
| PJM2 | 505   | 133 | 761718 | 0.07 |  | 3.763 | 0.123 | 0.2634 | 0.0068 | 0.79 | 0.1036 | 0.0021 |  | 1585 | 52 | 1507 | 39 | 1690 | 37  | 89  |
| PJM2 | 133   | 3   | 20025  | 0.32 |  | 0.180 | 0.013 | 0.0263 | 0.0007 | 0.40 | 0.0495 | 0.0032 |  | 168  | 12 | 167  | 5  | 172  | 149 | 97  |
| PJM2 | 239   | 6   | 35715  | 0.31 |  | 0.179 | 0.009 | 0.0262 | 0.0007 | 0.56 | 0.0495 | 0.0020 |  | 167  | 8  | 166  | 4  | 173  | 93  | 96  |
| PJM2 | 195   | 5   | 29313  | 0.30 |  | 0.179 | 0.014 | 0.0263 | 0.0007 | 0.36 | 0.0496 | 0.0035 |  | 168  | 13 | 167  | 5  | 174  | 166 | 96  |
| PJM2 | 199   | 5   | 1880   | 0.40 |  | 0.168 | 0.019 | 0.0245 | 0.0007 | 0.24 | 0.0498 | 0.0053 |  | 158  | 17 | 156  | 4  | 185  | 250 | 84  |
| PJM2 | 600   | 10  | 57422  | 0.06 |  | 0.111 | 0.005 | 0.0167 | 0.0004 | 0.59 | 0.0480 | 0.0017 |  | 107  | 5  | 107  | 3  | 101  | 86  | 106 |
| PJM2 | 924   | 98  | 23673  | 0.15 |  | 0.893 | 0.030 | 0.1059 | 0.0027 | 0.78 | 0.0612 | 0.0013 |  | 648  | 22 | 649  | 17 | 646  | 45  | 100 |
| PJM2 | 1042  | 41  | 6612   | 1.50 |  | 0.277 | 0.010 | 0.0394 | 0.0010 | 0.73 | 0.0510 | 0.0012 |  | 248  | 9  | 249  | 6  | 240  | 56  | 104 |
| PJM2 | 307   | 8   | 47362  | 0.11 |  | 0.185 | 0.009 | 0.0270 | 0.0007 | 0.58 | 0.0497 | 0.0019 |  | 172  | 8  | 172  | 5  | 180  | 88  | 96  |
| PJM2 | 303   | 54  | 310462 | 0.69 |  | 1.845 | 0.070 | 0.1794 | 0.0047 | 0.69 | 0.0746 | 0.0020 |  | 1062 | 40 | 1064 | 28 | 1058 | 55  | 101 |
| PJM2 | 521   | 8   | 2823   | 0.30 |  | 0.100 | 0.005 | 0.0151 | 0.0004 | 0.58 | 0.0480 | 0.0018 |  | 97   | 4  | 97   | 3  | 99   | 89  | 98  |
| PJM2 | 245   | 31  | 179117 | 0.31 |  | 1.257 | 0.044 | 0.1278 | 0.0033 | 0.74 | 0.0713 | 0.0017 |  | 826  | 29 | 775  | 20 | 966  | 48  | 80  |
| PJM2 | 311   | 8   | 2021   | 0.18 |  | 0.176 | 0.010 | 0.0259 | 0.0007 | 0.46 | 0.0494 | 0.0025 |  | 165  | 10 | 165  | 4  | 165  | 120 | 100 |
| PJM2 | 6612  | 94  | 21170  | 0.06 |  | 0.094 | 0.004 | 0.0142 | 0.0004 | 0.63 | 0.0483 | 0.0015 |  | 91   | 4  | 91   | 2  | 112  | 73  | 81  |
| PJM2 | 150   | 37  | 210018 | 0.52 |  | 3.012 | 0.103 | 0.2447 | 0.0064 | 0.76 | 0.0893 | 0.0020 |  | 1411 | 48 | 1411 | 37 | 1410 | 43  | 100 |
| PJM2 | 57    | 10  | 54277  | 0.63 |  | 1.657 | 0.067 | 0.1659 | 0.0044 | 0.66 | 0.0725 | 0.0022 |  | 992  | 40 | 989  | 26 | 999  | 62  | 99  |

|      |      |    |        |      |  |       |       |        |        |      |        |        |  |      |    |      |    |      |     |     |
|------|------|----|--------|------|--|-------|-------|--------|--------|------|--------|--------|--|------|----|------|----|------|-----|-----|
| PJM2 | 119  | 2  | 330    | 0.39 |  | 0.102 | 0.008 | 0.0154 | 0.0005 | 0.39 | 0.0482 | 0.0034 |  | 99   | 8  | 99   | 3  | 109  | 167 | 91  |
| PJM2 | 156  | 38 | 3688   | 0.54 |  | 3.040 | 0.106 | 0.2453 | 0.0064 | 0.75 | 0.0899 | 0.0021 |  | 1418 | 49 | 1414 | 37 | 1423 | 44  | 99  |
| PJM2 | 195  | 34 | 195013 | 0.28 |  | 1.794 | 0.063 | 0.1755 | 0.0046 | 0.75 | 0.0741 | 0.0017 |  | 1043 | 36 | 1043 | 27 | 1045 | 47  | 100 |
| PJM2 | 235  | 4  | 1300   | 0.30 |  | 0.100 | 0.012 | 0.0151 | 0.0004 | 0.23 | 0.0482 | 0.0056 |  | 97   | 12 | 97   | 3  | 107  | 274 | 90  |
| PJM2 | 922  | 24 | 5792   | 0.30 |  | 0.177 | 0.008 | 0.0260 | 0.0007 | 0.55 | 0.0494 | 0.0019 |  | 166  | 8  | 166  | 4  | 166  | 92  | 100 |
| PJM2 | 413  | 2  | 6569   | 0.58 |  | 0.036 | 0.003 | 0.0056 | 0.0002 | 0.41 | 0.0468 | 0.0030 |  | 36   | 3  | 36   | 1  | 40   | 153 | 91  |
| PJM2 | 186  | 33 | 33023  | 0.29 |  | 1.827 | 0.065 | 0.1779 | 0.0047 | 0.73 | 0.0745 | 0.0018 |  | 1055 | 38 | 1055 | 28 | 1054 | 49  | 100 |
| PJM2 | 1319 | 21 | 2478   | 0.59 |  | 0.105 | 0.005 | 0.0158 | 0.0004 | 0.62 | 0.0481 | 0.0016 |  | 101  | 4  | 101  | 3  | 105  | 81  | 96  |
| PJM2 | 255  | 7  | 1209   | 0.37 |  | 0.174 | 0.011 | 0.0256 | 0.0007 | 0.44 | 0.0494 | 0.0027 |  | 163  | 10 | 163  | 4  | 166  | 130 | 98  |
| PJM2 | 265  | 7  | 39350  | 0.28 |  | 0.178 | 0.010 | 0.0261 | 0.0007 | 0.48 | 0.0494 | 0.0024 |  | 166  | 9  | 166  | 4  | 169  | 115 | 98  |
| PJM2 | 156  | 4  | 1060   | 0.26 |  | 0.178 | 0.012 | 0.0261 | 0.0007 | 0.40 | 0.0494 | 0.0031 |  | 166  | 11 | 166  | 5  | 168  | 146 | 99  |
| PJM2 | 171  | 3  | 14905  | 0.28 |  | 0.101 | 0.007 | 0.0153 | 0.0004 | 0.43 | 0.0480 | 0.0029 |  | 98   | 7  | 98   | 3  | 97   | 142 | 101 |
| PJM2 | 358  | 9  | 1506   | 0.29 |  | 0.176 | 0.009 | 0.0258 | 0.0007 | 0.50 | 0.0494 | 0.0023 |  | 165  | 9  | 164  | 4  | 166  | 107 | 99  |
| PJM2 | 260  | 78 | 443272 | 0.20 |  | 4.282 | 0.143 | 0.2996 | 0.0078 | 0.78 | 0.1037 | 0.0022 |  | 1690 | 57 | 1690 | 44 | 1690 | 39  | 100 |
| PJM2 | 145  | 2  | 1058   | 0.40 |  | 0.101 | 0.013 | 0.0151 | 0.0004 | 0.23 | 0.0486 | 0.0061 |  | 98   | 13 | 96   | 3  | 130  | 293 | 74  |
| PJM2 | 430  | 7  | 695    | 0.14 |  | 0.114 | 0.006 | 0.0172 | 0.0005 | 0.49 | 0.0480 | 0.0023 |  | 109  | 6  | 110  | 3  | 101  | 112 | 109 |
| PJM2 | 420  | 70 | 9503   | 0.20 |  | 1.711 | 0.058 | 0.1670 | 0.0043 | 0.77 | 0.0743 | 0.0016 |  | 1013 | 34 | 996  | 26 | 1050 | 44  | 95  |
| PJM2 | 276  | 7  | 622    | 0.41 |  | 0.175 | 0.010 | 0.0256 | 0.0007 | 0.47 | 0.0495 | 0.0024 |  | 163  | 9  | 163  | 4  | 172  | 115 | 95  |
| PJM2 | 169  | 51 | 2991   | 0.60 |  | 4.249 | 0.146 | 0.2984 | 0.0078 | 0.76 | 0.1033 | 0.0023 |  | 1684 | 58 | 1683 | 44 | 1684 | 41  | 100 |
| PJM2 | 160  | 32 | 183583 | 0.21 |  | 2.213 | 0.078 | 0.2021 | 0.0053 | 0.75 | 0.0794 | 0.0019 |  | 1185 | 42 | 1186 | 31 | 1183 | 46  | 100 |
| PJM2 | 4436 | 62 | 16387  | 0.45 |  | 0.092 | 0.003 | 0.0140 | 0.0004 | 0.75 | 0.0477 | 0.0011 |  | 89   | 3  | 90   | 2  | 83   | 54  | 107 |
| PJM2 | 178  | 5  | 1137   | 0.25 |  | 0.173 | 0.013 | 0.0254 | 0.0007 | 0.37 | 0.0496 | 0.0035 |  | 162  | 12 | 161  | 4  | 178  | 163 | 91  |
| PJM2 | 631  | 23 | 4430   | 0.78 |  | 0.251 | 0.010 | 0.0358 | 0.0009 | 0.67 | 0.0509 | 0.0015 |  | 227  | 9  | 227  | 6  | 234  | 66  | 97  |
| PJM2 | 334  | 9  | 48727  | 0.34 |  | 0.175 | 0.010 | 0.0257 | 0.0007 | 0.45 | 0.0495 | 0.0026 |  | 164  | 10 | 163  | 4  | 173  | 122 | 94  |
| PJM2 | 195  | 5  | 666    | 0.23 |  | 0.177 | 0.010 | 0.0259 | 0.0007 | 0.50 | 0.0495 | 0.0023 |  | 165  | 9  | 165  | 4  | 173  | 110 | 95  |
| PJM2 | 108  | 2  | 847    | 0.33 |  | 0.101 | 0.009 | 0.0152 | 0.0005 | 0.33 | 0.0483 | 0.0042 |  | 98   | 9  | 97   | 3  | 115  | 205 | 84  |
| PJM2 | 223  | 3  | 12555  | 0.36 |  | 0.101 | 0.007 | 0.0151 | 0.0004 | 0.40 | 0.0482 | 0.0031 |  | 97   | 7  | 97   | 3  | 111  | 152 | 87  |
| PJM2 | 257  | 6  | 8796   | 0.24 |  | 0.152 | 0.008 | 0.0216 | 0.0006 | 0.55 | 0.0513 | 0.0021 |  | 144  | 7  | 137  | 4  | 254  | 95  | 54  |
| PJM2 | 135  | 5  | 29181  | 0.58 |  | 0.268 | 0.020 | 0.0382 | 0.0011 | 0.40 | 0.0509 | 0.0035 |  | 241  | 18 | 241  | 7  | 237  | 157 | 102 |

|      |       |     |        |       |  |       |       |        |        |      |        |        |  |      |    |      |    |      |     |     |
|------|-------|-----|--------|-------|--|-------|-------|--------|--------|------|--------|--------|--|------|----|------|----|------|-----|-----|
| PJM2 | 1475  | 23  | 129311 | 0.06  |  | 0.103 | 0.005 | 0.0155 | 0.0004 | 0.53 | 0.0482 | 0.0020 |  | 99   | 5  | 99   | 3  | 108  | 99  | 92  |
| PJM2 | 214   | 5   | 2994   | 0.41  |  | 0.174 | 0.010 | 0.0256 | 0.0007 | 0.47 | 0.0493 | 0.0025 |  | 163  | 9  | 163  | 4  | 164  | 120 | 99  |
| PJM2 | 142   | 6   | 682    | 0.46  |  | 0.307 | 0.016 | 0.0428 | 0.0012 | 0.51 | 0.0519 | 0.0024 |  | 272  | 15 | 270  | 7  | 281  | 106 | 96  |
| PJM2 | 182   | 5   | 26663  | 0.34  |  | 0.175 | 0.010 | 0.0258 | 0.0007 | 0.49 | 0.0493 | 0.0024 |  | 164  | 9  | 164  | 4  | 163  | 112 | 101 |
| PJM2 | 392   | 86  | 488233 | 0.31  |  | 3.167 | 0.107 | 0.2196 | 0.0057 | 0.77 | 0.1046 | 0.0022 |  | 1449 | 49 | 1280 | 33 | 1707 | 39  | 75  |
| PJM2 | 85    | 1   | 505    | 0.35  |  | 0.100 | 0.018 | 0.0150 | 0.0005 | 0.17 | 0.0482 | 0.0086 |  | 97   | 17 | 96   | 3  | 110  | 420 | 88  |
| PJM2 | 617   | 10  | 54378  | 0.26  |  | 0.104 | 0.005 | 0.0155 | 0.0004 | 0.56 | 0.0486 | 0.0019 |  | 101  | 5  | 99   | 3  | 128  | 93  | 78  |
| PJM2 | 199   | 5   | 3361   | 0.36  |  | 0.180 | 0.012 | 0.0265 | 0.0007 | 0.42 | 0.0494 | 0.0029 |  | 168  | 11 | 168  | 5  | 165  | 136 | 102 |
| PJM2 | 193   | 5   | 29996  | 0.36  |  | 0.188 | 0.010 | 0.0275 | 0.0008 | 0.52 | 0.0495 | 0.0022 |  | 175  | 9  | 175  | 5  | 172  | 106 | 102 |
| PJM2 | 11490 | 150 | 27266  | 6.61  |  | 0.087 | 0.003 | 0.0131 | 0.0003 | 0.77 | 0.0481 | 0.0010 |  | 84   | 3  | 84   | 2  | 102  | 51  | 82  |
| PJM2 | 98    | 24  | 3726   | 0.86  |  | 3.090 | 0.127 | 0.2482 | 0.0067 | 0.66 | 0.0903 | 0.0028 |  | 1430 | 59 | 1429 | 39 | 1432 | 59  | 100 |
| PJM2 | 7386  | 98  | 8871   | 7.90  |  | 0.089 | 0.003 | 0.0132 | 0.0003 | 0.75 | 0.0491 | 0.0011 |  | 87   | 3  | 85   | 2  | 152  | 52  | 56  |
| PJM2 | 111   | 2   | 9742   | 0.31  |  | 0.103 | 0.013 | 0.0155 | 0.0005 | 0.23 | 0.0483 | 0.0059 |  | 100  | 13 | 99   | 3  | 115  | 290 | 86  |
| PJM2 | 92    | 1   | 600    | 0.37  |  | 0.106 | 0.018 | 0.0160 | 0.0005 | 0.18 | 0.0484 | 0.0078 |  | 103  | 17 | 102  | 3  | 116  | 382 | 88  |
| PJM2 | 115   | 21  | 119012 | 0.37  |  | 1.919 | 0.072 | 0.1834 | 0.0049 | 0.70 | 0.0759 | 0.0020 |  | 1088 | 41 | 1085 | 29 | 1092 | 54  | 99  |
| PJM2 | 105   | 9   | 49385  | 0.50  |  | 0.661 | 0.030 | 0.0835 | 0.0023 | 0.61 | 0.0574 | 0.0020 |  | 515  | 23 | 517  | 14 | 507  | 78  | 102 |
| PJM2 | 4744  | 66  | 9700   | 0.52  |  | 0.092 | 0.003 | 0.0139 | 0.0004 | 0.74 | 0.0478 | 0.0011 |  | 89   | 3  | 89   | 2  | 88   | 56  | 101 |
| PJM2 | 10248 | 230 | 83873  | 0.13  |  | 0.152 | 0.005 | 0.0224 | 0.0006 | 0.77 | 0.0492 | 0.0011 |  | 144  | 5  | 143  | 4  | 157  | 50  | 91  |
| PJM2 | 145   | 4   | 2120   | 0.32  |  | 0.174 | 0.011 | 0.0254 | 0.0007 | 0.46 | 0.0497 | 0.0027 |  | 163  | 10 | 161  | 5  | 182  | 126 | 89  |
| PJM2 | 181   | 5   | 17311  | 0.30  |  | 0.177 | 0.012 | 0.0259 | 0.0007 | 0.40 | 0.0495 | 0.0032 |  | 165  | 12 | 165  | 5  | 170  | 150 | 97  |
| PJM2 | 94    | 14  | 1452   | 0.44  |  | 1.534 | 0.059 | 0.1473 | 0.0039 | 0.69 | 0.0755 | 0.0021 |  | 944  | 37 | 886  | 24 | 1083 | 56  | 82  |
| PJM2 | 12960 | 174 | 11059  | 5.38  |  | 0.090 | 0.003 | 0.0134 | 0.0004 | 0.78 | 0.0488 | 0.0011 |  | 88   | 3  | 86   | 2  | 139  | 51  | 62  |
| PJM2 | 371   | 10  | 16934  | 0.08  |  | 0.191 | 0.009 | 0.0272 | 0.0007 | 0.56 | 0.0509 | 0.0020 |  | 177  | 8  | 173  | 5  | 236  | 91  | 73  |
| PJM2 | 3687  | 52  | 3811   | 17.65 |  | 0.093 | 0.004 | 0.0140 | 0.0004 | 0.58 | 0.0481 | 0.0017 |  | 90   | 4  | 89   | 2  | 102  | 86  | 88  |
| PJM2 | 5697  | 78  | 5030   | 8.04  |  | 0.090 | 0.004 | 0.0137 | 0.0004 | 0.64 | 0.0480 | 0.0015 |  | 88   | 4  | 88   | 2  | 98   | 74  | 90  |
| PJM2 | 9728  | 224 | 15987  | 6.47  |  | 0.156 | 0.005 | 0.0230 | 0.0006 | 0.76 | 0.0492 | 0.0011 |  | 148  | 5  | 147  | 4  | 159  | 52  | 92  |

Table S4E: U-Pb zircon data-231011L19#20.

| Sample | U [ppm] <sup>a</sup> | Pb [ppm] <sup>a</sup> | <sup>206</sup> Pb/ <sup>204</sup> Pb | Th/U <sup>a</sup> |  | RATIOS                                           |              |                                                  |              |                  |                                                   |              |  | AGES [Ma]                           |            |                                     |            |                                      |            | Conc. |
|--------|----------------------|-----------------------|--------------------------------------|-------------------|--|--------------------------------------------------|--------------|--------------------------------------------------|--------------|------------------|---------------------------------------------------|--------------|--|-------------------------------------|------------|-------------------------------------|------------|--------------------------------------|------------|-------|
|        |                      |                       |                                      |                   |  | <sup>207</sup> Pb/ <sup>235</sup> U <sup>b</sup> | 2 $\sigma^d$ | <sup>206</sup> Pb/ <sup>238</sup> U <sup>b</sup> | 2 $\sigma^d$ | rho <sup>c</sup> | <sup>207</sup> Pb/ <sup>206</sup> Pb <sup>e</sup> | 2 $\sigma^d$ |  | <sup>207</sup> Pb/ <sup>235</sup> U | 2 $\sigma$ | <sup>206</sup> Pb/ <sup>238</sup> U | 2 $\sigma$ | <sup>207</sup> Pb/ <sup>206</sup> Pb | 2 $\sigma$ | %     |
| PJM3   | 1980                 | 42                    | 4843                                 | 19.90             |  | 0.143                                            | 0.007        | 0.0213                                           | 0.0006       | 0.51             | 0.0487                                            | 0.0022       |  | 136                                 | 7          | 136                                 | 4          | 134                                  | 104        | 102   |
| PJM3   | 101                  | 3                     | 872                                  | 0.30              |  | 0.179                                            | 0.013        | 0.0262                                           | 0.0007       | 0.38             | 0.0496                                            | 0.0034       |  | 167                                 | 12         | 167                                 | 5          | 178                                  | 161        | 94    |
| PJM3   | 149                  | 4                     | 1904                                 | 0.19              |  | 0.181                                            | 0.010        | 0.0264                                           | 0.0007       | 0.51             | 0.0498                                            | 0.0023       |  | 169                                 | 9          | 168                                 | 5          | 185                                  | 109        | 91    |
| PJM3   | 356                  | 8                     | 66035                                | 0.26              |  | 0.150                                            | 0.006        | 0.0223                                           | 0.0006       | 0.64             | 0.0488                                            | 0.0016       |  | 142                                 | 6          | 142                                 | 4          | 139                                  | 75         | 102   |
| PJM3   | 155                  | 4                     | 33810                                | 0.34              |  | 0.178                                            | 0.010        | 0.0261                                           | 0.0007       | 0.48             | 0.0494                                            | 0.0025       |  | 166                                 | 10         | 166                                 | 5          | 165                                  | 119        | 101   |
| PJM3   | 256                  | 8                     | 63867                                | 0.55              |  | 0.206                                            | 0.009        | 0.0299                                           | 0.0008       | 0.61             | 0.0501                                            | 0.0018       |  | 190                                 | 8          | 190                                 | 5          | 198                                  | 82         | 96    |
| PJM3   | 167                  | 4                     | 13973                                | 0.35              |  | 0.181                                            | 0.012        | 0.0266                                           | 0.0008       | 0.43             | 0.0494                                            | 0.0031       |  | 169                                 | 12         | 169                                 | 5          | 169                                  | 145        | 100   |
| PJM3   | 205                  | 44                    | 363254                               | 0.39              |  | 2.634                                            | 0.090        | 0.2122                                           | 0.0056       | 0.77             | 0.0900                                            | 0.0019       |  | 1310                                | 45         | 1241                                | 33         | 1426                                 | 41         | 87    |
| PJM3   | 129                  | 4                     | 555                                  | 0.34              |  | 0.186                                            | 0.017        | 0.0273                                           | 0.0008       | 0.30             | 0.0495                                            | 0.0044       |  | 173                                 | 16         | 173                                 | 5          | 172                                  | 208        | 101   |
| PJM3   | 298                  | 73                    | 605954                               | 0.42              |  | 2.994                                            | 0.101        | 0.2441                                           | 0.0064       | 0.78             | 0.0890                                            | 0.0019       |  | 1406                                | 47         | 1408                                | 37         | 1403                                 | 40         | 100   |
| PJM3   | 1152                 | 18                    | 3577                                 | 0.01              |  | 0.103                                            | 0.004        | 0.0156                                           | 0.0004       | 0.72             | 0.0479                                            | 0.0012       |  | 100                                 | 4          | 100                                 | 3          | 94                                   | 61         | 107   |
| PJM3   | 397                  | 37                    | 311087                               | 0.22              |  | 0.808                                            | 0.028        | 0.0940                                           | 0.0025       | 0.76             | 0.0623                                            | 0.0014       |  | 601                                 | 21         | 579                                 | 15         | 685                                  | 49         | 85    |
| PJM3   | 332                  | 8                     | 2139                                 | 0.17              |  | 0.173                                            | 0.007        | 0.0254                                           | 0.0007       | 0.63             | 0.0495                                            | 0.0016       |  | 162                                 | 7          | 162                                 | 4          | 172                                  | 76         | 94    |
| PJM3   | 96                   | 1                     | 413                                  | 0.41              |  | 0.100                                            | 0.015        | 0.0150                                           | 0.0004       | 0.19             | 0.0482                                            | 0.0073       |  | 97                                  | 15         | 96                                  | 3          | 110                                  | 357        | 88    |
| PJM3   | 62                   | 2                     | 13304                                | 0.30              |  | 0.175                                            | 0.012        | 0.0258                                           | 0.0008       | 0.42             | 0.0493                                            | 0.0032       |  | 164                                 | 12         | 164                                 | 5          | 163                                  | 151        | 101   |
| PJM3   | 87                   | 2                     | 624                                  | 0.29              |  | 0.183                                            | 0.013        | 0.0268                                           | 0.0008       | 0.41             | 0.0497                                            | 0.0033       |  | 171                                 | 12         | 170                                 | 5          | 179                                  | 153        | 95    |
| PJM3   | 70                   | 1                     | 9030                                 | 0.37              |  | 0.102                                            | 0.011        | 0.0154                                           | 0.0005       | 0.28             | 0.0482                                            | 0.0052       |  | 99                                  | 11         | 99                                  | 3          | 108                                  | 253        | 91    |
| PJM3   | 61                   | 1                     | 451                                  | 0.34              |  | 0.102                                            | 0.019        | 0.0154                                           | 0.0005       | 0.17             | 0.0479                                            | 0.0086       |  | 98                                  | 18         | 98                                  | 3          | 96                                   | 427        | 102   |
| PJM3   | 118                  | 2                     | 15246                                | 0.38              |  | 0.103                                            | 0.008        | 0.0155                                           | 0.0004       | 0.36             | 0.0482                                            | 0.0036       |  | 99                                  | 8          | 99                                  | 3          | 110                                  | 175        | 90    |
| PJM3   | 341                  | 9                     | 2882                                 | 0.16              |  | 0.180                                            | 0.011        | 0.0264                                           | 0.0007       | 0.45             | 0.0495                                            | 0.0027       |  | 168                                 | 10         | 168                                 | 5          | 170                                  | 126        | 99    |
| PJM3   | 199                  | 3                     | 2053                                 | 0.16              |  | 0.101                                            | 0.008        | 0.0153                                           | 0.0004       | 0.35             | 0.0481                                            | 0.0036       |  | 98                                  | 8          | 98                                  | 3          | 103                                  | 175        | 95    |
| PJM3   | 418                  | 7                     | 2006                                 | 0.09              |  | 0.111                                            | 0.008        | 0.0167                                           | 0.0005       | 0.38             | 0.0482                                            | 0.0033       |  | 107                                 | 8          | 107                                 | 3          | 111                                  | 160        | 97    |
| PJM3   | 93                   | 1                     | 237                                  | 0.33              |  | 0.101                                            | 0.013        | 0.0153                                           | 0.0005       | 0.24             | 0.0480                                            | 0.0059       |  | 98                                  | 12         | 98                                  | 3          | 100                                  | 293        | 98    |
| PJM3   | 128                  | 2                     | 2806                                 | 0.45              |  | 0.106                                            | 0.007        | 0.0155                                           | 0.0004       | 0.44             | 0.0499                                            | 0.0029       |  | 103                                 | 7          | 99                                  | 3          | 188                                  | 136        | 53    |
| PJM3   | 469                  | 136                   | 45247                                | 0.10              |  | 4.118                                            | 0.141        | 0.2908                                           | 0.0077       | 0.77             | 0.1027                                            | 0.0022       |  | 1658                                | 57         | 1646                                | 43         | 1673                                 | 40         | 98    |
| PJM3   | 179                  | 6                     | 53991                                | 0.32              |  | 0.253                                            | 0.014        | 0.0362                                           | 0.0010       | 0.51             | 0.0506                                            | 0.0024       |  | 229                                 | 13         | 229                                 | 6          | 224                                  | 109        | 102   |

|      |     |     |         |      |  |       |       |        |        |      |        |        |  |      |    |      |    |      |     |      |
|------|-----|-----|---------|------|--|-------|-------|--------|--------|------|--------|--------|--|------|----|------|----|------|-----|------|
| PJM3 | 167 | 30  | 249164  | 0.69 |  | 1.853 | 0.067 | 0.1788 | 0.0048 | 0.74 | 0.0752 | 0.0018 |  | 1065 | 39 | 1060 | 28 | 1073 | 49  | 99   |
| PJM3 | 51  | 10  | 1230    | 0.65 |  | 2.072 | 0.080 | 0.1944 | 0.0052 | 0.69 | 0.0773 | 0.0022 |  | 1140 | 44 | 1145 | 31 | 1129 | 56  | 101  |
| PJM3 | 95  | 2   | 1147    | 0.30 |  | 0.178 | 0.010 | 0.0262 | 0.0007 | 0.48 | 0.0493 | 0.0025 |  | 167  | 10 | 167  | 5  | 163  | 119 | 102  |
| PJM3 | 113 | 3   | 1287    | 0.37 |  | 0.173 | 0.016 | 0.0254 | 0.0007 | 0.30 | 0.0494 | 0.0045 |  | 162  | 15 | 162  | 5  | 166  | 212 | 97   |
| PJM3 | 127 | 23  | 192083  | 0.56 |  | 1.898 | 0.069 | 0.1823 | 0.0049 | 0.73 | 0.0755 | 0.0019 |  | 1081 | 39 | 1080 | 29 | 1082 | 50  | 100  |
| PJM3 | 119 | 5   | 1205    | 0.20 |  | 0.320 | 0.028 | 0.0448 | 0.0014 | 0.37 | 0.0519 | 0.0042 |  | 282  | 25 | 282  | 9  | 281  | 187 | 101  |
| PJM3 | 148 | 4   | 675     | 0.22 |  | 0.184 | 0.010 | 0.0270 | 0.0008 | 0.52 | 0.0495 | 0.0023 |  | 172  | 9  | 171  | 5  | 173  | 108 | 99   |
| PJM3 | 171 | 4   | 618     | 0.35 |  | 0.176 | 0.011 | 0.0257 | 0.0007 | 0.45 | 0.0495 | 0.0026 |  | 164  | 10 | 164  | 4  | 173  | 124 | 95   |
| PJM3 | 103 | 4   | 30411   | 0.32 |  | 0.248 | 0.013 | 0.0356 | 0.0010 | 0.54 | 0.0506 | 0.0022 |  | 225  | 12 | 225  | 6  | 224  | 100 | 101  |
| PJM3 | 186 | 7   | 2002    | 0.44 |  | 0.283 | 0.014 | 0.0400 | 0.0011 | 0.57 | 0.0513 | 0.0020 |  | 253  | 12 | 253  | 7  | 254  | 91  | 99   |
| PJM3 | 114 | 3   | 24141   | 0.31 |  | 0.173 | 0.013 | 0.0253 | 0.0007 | 0.38 | 0.0496 | 0.0034 |  | 162  | 12 | 161  | 5  | 175  | 162 | 92   |
| PJM3 | 104 | 2   | 438     | 0.32 |  | 0.101 | 0.007 | 0.0152 | 0.0004 | 0.42 | 0.0480 | 0.0030 |  | 97   | 7  | 97   | 3  | 100  | 146 | 97   |
| PJM3 | 151 | 4   | 1272    | 0.28 |  | 0.174 | 0.009 | 0.0247 | 0.0007 | 0.54 | 0.0512 | 0.0022 |  | 163  | 8  | 157  | 4  | 248  | 98  | 63   |
| PJM3 | 365 | 89  | 31706   | 0.51 |  | 2.979 | 0.106 | 0.2428 | 0.0064 | 0.74 | 0.0890 | 0.0021 |  | 1402 | 50 | 1401 | 37 | 1404 | 46  | 100  |
| PJM3 | 196 | 35  | 294735  | 0.78 |  | 1.885 | 0.069 | 0.1805 | 0.0048 | 0.73 | 0.0758 | 0.0019 |  | 1076 | 39 | 1069 | 28 | 1088 | 50  | 98   |
| PJM3 | 138 | 36  | 5735    | 0.21 |  | 3.438 | 0.126 | 0.2638 | 0.0070 | 0.73 | 0.0945 | 0.0024 |  | 1513 | 55 | 1509 | 40 | 1518 | 47  | 99   |
| PJM3 | 140 | 3   | 27969   | 0.21 |  | 0.165 | 0.015 | 0.0240 | 0.0007 | 0.30 | 0.0498 | 0.0044 |  | 155  | 14 | 153  | 4  | 187  | 205 | 82   |
| PJM3 | 166 | 4   | 39414   | 0.36 |  | 0.185 | 0.010 | 0.0269 | 0.0007 | 0.51 | 0.0499 | 0.0023 |  | 173  | 9  | 171  | 5  | 191  | 106 | 90   |
| PJM3 | 186 | 5   | 43707   | 0.24 |  | 0.182 | 0.014 | 0.0267 | 0.0008 | 0.38 | 0.0495 | 0.0036 |  | 170  | 13 | 170  | 5  | 172  | 168 | 99   |
| PJM3 | 157 | 2   | 541     | 0.31 |  | 0.099 | 0.005 | 0.0157 | 0.0004 | 0.50 | 0.0457 | 0.0021 |  | 96   | 5  | 100  | 3  | -17  | 111 | -604 |
| PJM3 | 468 | 7   | 8266    | 0.47 |  | 0.106 | 0.004 | 0.0160 | 0.0004 | 0.63 | 0.0481 | 0.0015 |  | 102  | 4  | 102  | 3  | 102  | 74  | 100  |
| PJM3 | 702 | 151 | 1330789 | 0.06 |  | 2.720 | 0.094 | 0.2144 | 0.0054 | 0.73 | 0.0920 | 0.0022 |  | 1334 | 46 | 1252 | 31 | 1468 | 45  | 85   |
| PJM3 | 150 | 2   | 21313   | 0.43 |  | 0.106 | 0.006 | 0.0160 | 0.0004 | 0.46 | 0.0482 | 0.0024 |  | 103  | 6  | 102  | 3  | 107  | 119 | 96   |
| PJM3 | 480 | 14  | 2124    | 0.39 |  | 0.194 | 0.009 | 0.0283 | 0.0007 | 0.53 | 0.0497 | 0.0020 |  | 180  | 8  | 180  | 4  | 181  | 93  | 99   |
| PJM3 | 121 | 39  | 9748    | 0.57 |  | 5.068 | 0.171 | 0.3190 | 0.0080 | 0.74 | 0.1152 | 0.0026 |  | 1831 | 62 | 1785 | 45 | 1883 | 41  | 95   |
| PJM3 | 168 | 30  | 9955    | 0.46 |  | 1.849 | 0.062 | 0.1795 | 0.0045 | 0.74 | 0.0747 | 0.0017 |  | 1063 | 36 | 1064 | 26 | 1061 | 45  | 100  |
| PJM3 | 207 | 6   | 2746    | 0.24 |  | 0.190 | 0.008 | 0.0278 | 0.0007 | 0.60 | 0.0495 | 0.0017 |  | 176  | 7  | 177  | 4  | 172  | 79  | 103  |
| PJM3 | 262 | 7   | 60174   | 0.24 |  | 0.176 | 0.007 | 0.0258 | 0.0007 | 0.62 | 0.0494 | 0.0016 |  | 164  | 7  | 164  | 4  | 164  | 75  | 100  |
| PJM3 | 208 | 6   | 4147    | 0.26 |  | 0.182 | 0.008 | 0.0267 | 0.0007 | 0.57 | 0.0495 | 0.0018 |  | 170  | 8  | 170  | 4  | 173  | 86  | 99   |

|      |       |     |        |       |  |       |       |        |        |      |        |        |  |      |    |      |    |      |     |     |
|------|-------|-----|--------|-------|--|-------|-------|--------|--------|------|--------|--------|--|------|----|------|----|------|-----|-----|
| PJM3 | 260   | 6   | 2663   | 0.33  |  | 0.151 | 0.007 | 0.0224 | 0.0006 | 0.56 | 0.0490 | 0.0019 |  | 143  | 7  | 143  | 4  | 148  | 90  | 97  |
| PJM3 | 163   | 4   | 944    | 0.31  |  | 0.183 | 0.009 | 0.0268 | 0.0007 | 0.51 | 0.0495 | 0.0021 |  | 170  | 8  | 170  | 4  | 171  | 100 | 99  |
| PJM3 | 48    | 9   | 79915  | 0.35  |  | 1.956 | 0.071 | 0.1857 | 0.0047 | 0.69 | 0.0764 | 0.0020 |  | 1101 | 40 | 1098 | 28 | 1106 | 53  | 99  |
| PJM3 | 4607  | 100 | 5503   | 6.93  |  | 0.146 | 0.005 | 0.0216 | 0.0005 | 0.71 | 0.0491 | 0.0012 |  | 139  | 5  | 138  | 3  | 150  | 57  | 92  |
| PJM3 | 115   | 4   | 32222  | 0.27  |  | 0.216 | 0.013 | 0.0313 | 0.0009 | 0.46 | 0.0502 | 0.0027 |  | 199  | 12 | 198  | 5  | 205  | 125 | 97  |
| PJM3 | 162   | 4   | 4013   | 0.27  |  | 0.182 | 0.008 | 0.0267 | 0.0007 | 0.58 | 0.0494 | 0.0018 |  | 170  | 7  | 170  | 4  | 168  | 83  | 101 |
| PJM3 | 339   | 41  | 17620  | 0.18  |  | 1.216 | 0.040 | 0.1200 | 0.0029 | 0.75 | 0.0736 | 0.0016 |  | 808  | 26 | 730  | 18 | 1029 | 44  | 71  |
| PJM3 | 150   | 6   | 57944  | 0.47  |  | 0.307 | 0.012 | 0.0432 | 0.0011 | 0.63 | 0.0515 | 0.0016 |  | 272  | 11 | 273  | 7  | 262  | 71  | 104 |
| PJM3 | 660   | 21  | 4833   | 0.71  |  | 0.220 | 0.008 | 0.0320 | 0.0008 | 0.71 | 0.0499 | 0.0012 |  | 202  | 7  | 203  | 5  | 189  | 56  | 107 |
| PJM3 | 160   | 4   | 873    | 0.34  |  | 0.183 | 0.008 | 0.0268 | 0.0007 | 0.58 | 0.0495 | 0.0018 |  | 171  | 8  | 170  | 4  | 173  | 84  | 98  |
| PJM3 | 129   | 2   | 18823  | 0.36  |  | 0.108 | 0.006 | 0.0162 | 0.0004 | 0.44 | 0.0485 | 0.0026 |  | 104  | 6  | 103  | 3  | 124  | 124 | 84  |
| PJM3 | 308   | 5   | 45953  | 0.29  |  | 0.110 | 0.005 | 0.0166 | 0.0004 | 0.57 | 0.0481 | 0.0018 |  | 106  | 5  | 106  | 3  | 106  | 86  | 100 |
| PJM3 | 353   | 11  | 3533   | 0.30  |  | 0.223 | 0.011 | 0.0321 | 0.0008 | 0.52 | 0.0504 | 0.0022 |  | 204  | 10 | 204  | 5  | 211  | 100 | 96  |
| PJM3 | 165   | 4   | 3396   | 0.33  |  | 0.180 | 0.008 | 0.0265 | 0.0007 | 0.57 | 0.0492 | 0.0018 |  | 168  | 7  | 169  | 4  | 158  | 85  | 107 |
| PJM3 | 657   | 11  | 5005   | 0.30  |  | 0.106 | 0.004 | 0.0161 | 0.0004 | 0.67 | 0.0481 | 0.0013 |  | 103  | 4  | 103  | 3  | 104  | 66  | 99  |
| PJM3 | 115   | 2   | 875    | 0.29  |  | 0.106 | 0.008 | 0.0159 | 0.0005 | 0.36 | 0.0481 | 0.0036 |  | 102  | 8  | 102  | 3  | 105  | 175 | 97  |
| PJM3 | 448   | 7   | 62037  | 0.35  |  | 0.102 | 0.005 | 0.0153 | 0.0004 | 0.54 | 0.0481 | 0.0018 |  | 98   | 4  | 98   | 2  | 102  | 91  | 96  |
| PJM3 | 6029  | 91  | 988    | 7.15  |  | 0.100 | 0.004 | 0.0150 | 0.0004 | 0.67 | 0.0481 | 0.0013 |  | 96   | 3  | 96   | 2  | 102  | 63  | 94  |
| PJM3 | 1729  | 26  | 2730   | 46.24 |  | 0.102 | 0.005 | 0.0150 | 0.0004 | 0.45 | 0.0492 | 0.0024 |  | 99   | 5  | 96   | 2  | 159  | 112 | 61  |
| PJM3 | 167   | 13  | 114350 | 0.88  |  | 0.596 | 0.024 | 0.0757 | 0.0019 | 0.62 | 0.0571 | 0.0018 |  | 475  | 19 | 470  | 12 | 495  | 69  | 95  |
| PJM3 | 174   | 3   | 24874  | 0.29  |  | 0.104 | 0.007 | 0.0157 | 0.0004 | 0.42 | 0.0482 | 0.0029 |  | 101  | 7  | 100  | 3  | 107  | 142 | 94  |
| PJM3 | 10677 | 167 | 27893  | 0.09  |  | 0.103 | 0.003 | 0.0156 | 0.0004 | 0.75 | 0.0480 | 0.0010 |  | 100  | 3  | 100  | 2  | 97   | 50  | 103 |
| PJM3 | 89    | 1   | 13102  | 0.30  |  | 0.107 | 0.007 | 0.0160 | 0.0004 | 0.41 | 0.0482 | 0.0029 |  | 103  | 7  | 103  | 3  | 109  | 142 | 94  |
| PJM3 | 94    | 3   | 23664  | 0.25  |  | 0.188 | 0.017 | 0.0274 | 0.0007 | 0.28 | 0.0497 | 0.0043 |  | 175  | 16 | 174  | 4  | 182  | 203 | 96  |
| PJM3 | 166   | 7   | 33699  | 0.54  |  | 0.306 | 0.012 | 0.0428 | 0.0010 | 0.62 | 0.0518 | 0.0016 |  | 271  | 11 | 270  | 7  | 276  | 70  | 98  |
| PJM3 | 492   | 47  | 10925  | 0.89  |  | 1.286 | 0.041 | 0.0959 | 0.0023 | 0.74 | 0.0972 | 0.0021 |  | 839  | 27 | 590  | 14 | 1572 | 40  | 38  |
| PJM3 | 27954 | 426 | 221197 | 0.10  |  | 0.101 | 0.003 | 0.0152 | 0.0004 | 0.72 | 0.0479 | 0.0011 |  | 97   | 3  | 98   | 2  | 93   | 53  | 105 |
| PJM3 | 415   | 11  | 102290 | 0.37  |  | 0.183 | 0.007 | 0.0268 | 0.0006 | 0.61 | 0.0495 | 0.0015 |  | 170  | 7  | 170  | 4  | 173  | 73  | 99  |
| PJM3 | 100   | 3   | 24921  | 0.30  |  | 0.185 | 0.016 | 0.0271 | 0.0007 | 0.30 | 0.0496 | 0.0040 |  | 172  | 14 | 172  | 4  | 174  | 187 | 99  |

|      |       |     |        |       |  |       |       |        |        |      |        |        |  |      |    |      |    |      |     |     |
|------|-------|-----|--------|-------|--|-------|-------|--------|--------|------|--------|--------|--|------|----|------|----|------|-----|-----|
| PJM3 | 177   | 3   | 25452  | 0.34  |  | 0.104 | 0.018 | 0.0156 | 0.0004 | 0.16 | 0.0482 | 0.0083 |  | 100  | 17 | 100  | 3  | 109  | 405 | 91  |
| PJM3 | 8789  | 128 | 18423  | 0.16  |  | 0.097 | 0.003 | 0.0146 | 0.0003 | 0.73 | 0.0481 | 0.0010 |  | 94   | 3  | 94   | 2  | 102  | 51  | 92  |
| PJM3 | 667   | 21  | 5889   | 0.75  |  | 0.215 | 0.009 | 0.0311 | 0.0008 | 0.60 | 0.0502 | 0.0016 |  | 198  | 8  | 197  | 5  | 204  | 76  | 97  |
| PJM3 | 6414  | 87  | 10967  | 12.16 |  | 0.092 | 0.003 | 0.0135 | 0.0003 | 0.73 | 0.0492 | 0.0011 |  | 89   | 3  | 86   | 2  | 157  | 51  | 55  |
| PJM3 | 332   | 9   | 2183   | 0.33  |  | 0.179 | 0.007 | 0.0263 | 0.0006 | 0.64 | 0.0494 | 0.0014 |  | 167  | 6  | 167  | 4  | 166  | 68  | 100 |
| PJM3 | 348   | 13  | 124543 | 0.79  |  | 0.274 | 0.010 | 0.0386 | 0.0009 | 0.66 | 0.0514 | 0.0014 |  | 246  | 9  | 244  | 6  | 257  | 62  | 95  |
| PJM3 | 1676  | 26  | 3299   | 9.49  |  | 0.117 | 0.004 | 0.0158 | 0.0004 | 0.65 | 0.0538 | 0.0015 |  | 112  | 4  | 101  | 2  | 361  | 63  | 28  |
| PJM3 | 393   | 72  | 20177  | 0.87  |  | 1.904 | 0.061 | 0.1830 | 0.0043 | 0.74 | 0.0755 | 0.0016 |  | 1083 | 35 | 1083 | 26 | 1081 | 44  | 100 |
| PJM3 | 144   | 4   | 10404  | 0.27  |  | 0.175 | 0.008 | 0.0258 | 0.0006 | 0.55 | 0.0493 | 0.0019 |  | 164  | 7  | 164  | 4  | 164  | 89  | 100 |
| PJM3 | 173   | 5   | 43479  | 0.42  |  | 0.184 | 0.010 | 0.0270 | 0.0007 | 0.44 | 0.0495 | 0.0025 |  | 171  | 10 | 171  | 4  | 172  | 117 | 100 |
| PJM3 | 126   | 3   | 667    | 0.32  |  | 0.179 | 0.011 | 0.0262 | 0.0006 | 0.41 | 0.0497 | 0.0027 |  | 167  | 10 | 166  | 4  | 179  | 126 | 93  |
| PJM3 | 60    | 12  | 110603 | 0.60  |  | 2.127 | 0.074 | 0.1970 | 0.0047 | 0.68 | 0.0783 | 0.0020 |  | 1158 | 41 | 1159 | 28 | 1155 | 51  | 100 |
| PJM3 | 74    | 2   | 3665   | 0.29  |  | 0.187 | 0.010 | 0.0273 | 0.0007 | 0.46 | 0.0495 | 0.0025 |  | 174  | 10 | 174  | 4  | 173  | 117 | 101 |
| PJM3 | 47    | 1   | 313    | 0.32  |  | 0.106 | 0.015 | 0.0159 | 0.0005 | 0.21 | 0.0483 | 0.0066 |  | 102  | 14 | 102  | 3  | 116  | 321 | 88  |
| PJM3 | 366   | 7   | 65989  | 0.04  |  | 0.136 | 0.005 | 0.0193 | 0.0005 | 0.61 | 0.0513 | 0.0016 |  | 130  | 5  | 123  | 3  | 253  | 71  | 49  |
| PJM3 | 92    | 27  | 14869  | 0.38  |  | 4.227 | 0.142 | 0.2977 | 0.0071 | 0.71 | 0.1030 | 0.0024 |  | 1679 | 56 | 1680 | 40 | 1678 | 44  | 100 |
| PJM3 | 18413 | 252 | 20187  | 3.88  |  | 0.090 | 0.003 | 0.0137 | 0.0003 | 0.73 | 0.0479 | 0.0010 |  | 88   | 3  | 88   | 2  | 93   | 51  | 94  |
| PJM3 | 426   | 11  | 106143 | 0.43  |  | 0.181 | 0.007 | 0.0266 | 0.0006 | 0.65 | 0.0493 | 0.0014 |  | 169  | 6  | 169  | 4  | 164  | 65  | 103 |
| PJM3 | 220   | 6   | 54079  | 0.41  |  | 0.180 | 0.009 | 0.0263 | 0.0007 | 0.50 | 0.0496 | 0.0021 |  | 168  | 8  | 167  | 4  | 176  | 101 | 95  |
| PJM3 | 159   | 2   | 6616   | 0.39  |  | 0.103 | 0.006 | 0.0155 | 0.0004 | 0.43 | 0.0480 | 0.0026 |  | 99   | 6  | 99   | 3  | 99   | 127 | 100 |
| PJM3 | 546   | 167 | 86906  | 0.59  |  | 4.413 | 0.141 | 0.3059 | 0.0072 | 0.73 | 0.1046 | 0.0023 |  | 1715 | 55 | 1721 | 40 | 1707 | 40  | 101 |
| PJM3 | 399   | 11  | 104727 | 0.23  |  | 0.192 | 0.011 | 0.0280 | 0.0007 | 0.40 | 0.0498 | 0.0027 |  | 178  | 11 | 178  | 4  | 187  | 127 | 95  |

<sup>a</sup>U and Pb concentrations and Th/U ratios are calculated relative to GJ-1 reference zircon

<sup>b</sup>Corrected for background and within-run Pb/U fractionation and normalised to reference zircon GJ-1 (ID-TIMS values/measured value); <sup>207</sup>Pb/<sup>235</sup>U calculated using (<sup>207</sup>Pb/<sup>206</sup>Pb)/(<sup>238</sup>U/<sup>206</sup>Pb \* 1/137.88)

<sup>c</sup>Rho is the error correlation defined as the quotient of the propagated errors of the <sup>206</sup>Pb/<sup>238</sup>U and the <sup>207</sup>/<sup>235</sup>U ratio

<sup>d</sup>Quadratic addition of within-run errors (2 SD) and daily reproducibility of GJ-1 (2 SD)

<sup>e</sup>Corrected for mass-bias by normalising to GJ-1 reference zircon (~0.6 per atomic mass unit) and common Pb using the model Pb composition of Stacey & Kramers (1975)
