# Supplementary material
Source: MDPI journal article supplement (https://www.mdpi.com/2076-3263/13/2/45)
Supplement: s1 [file s1]

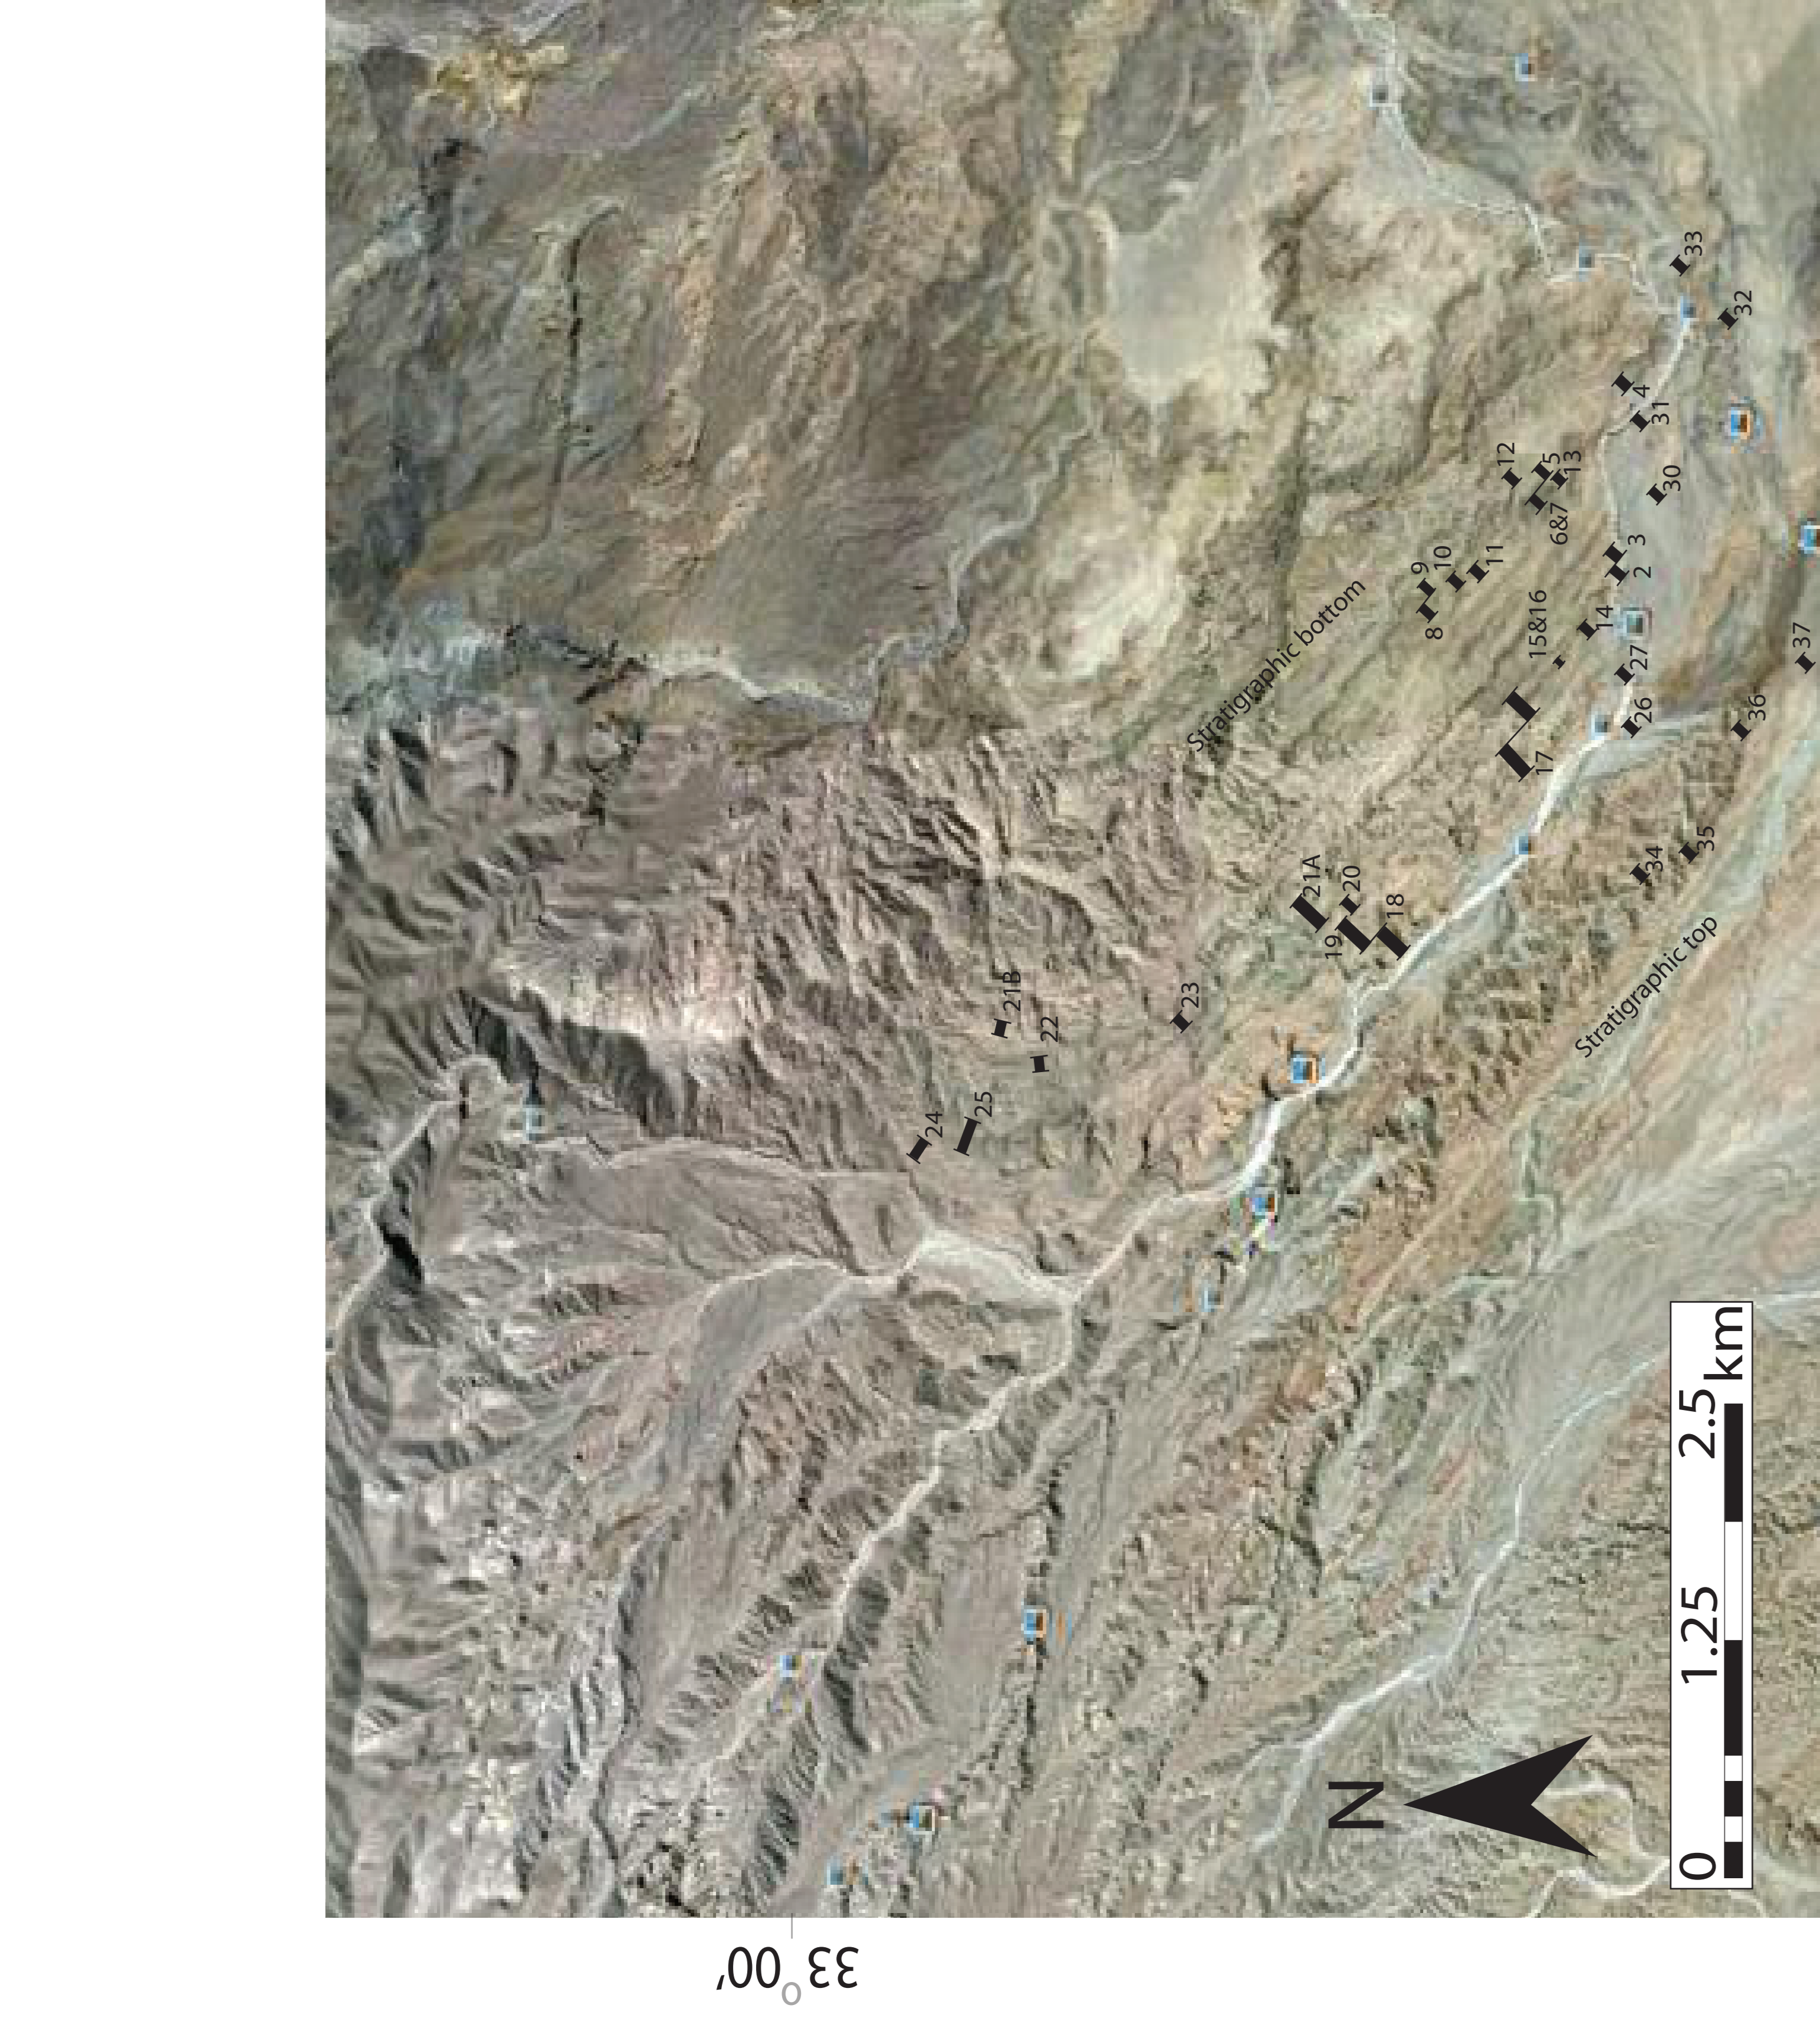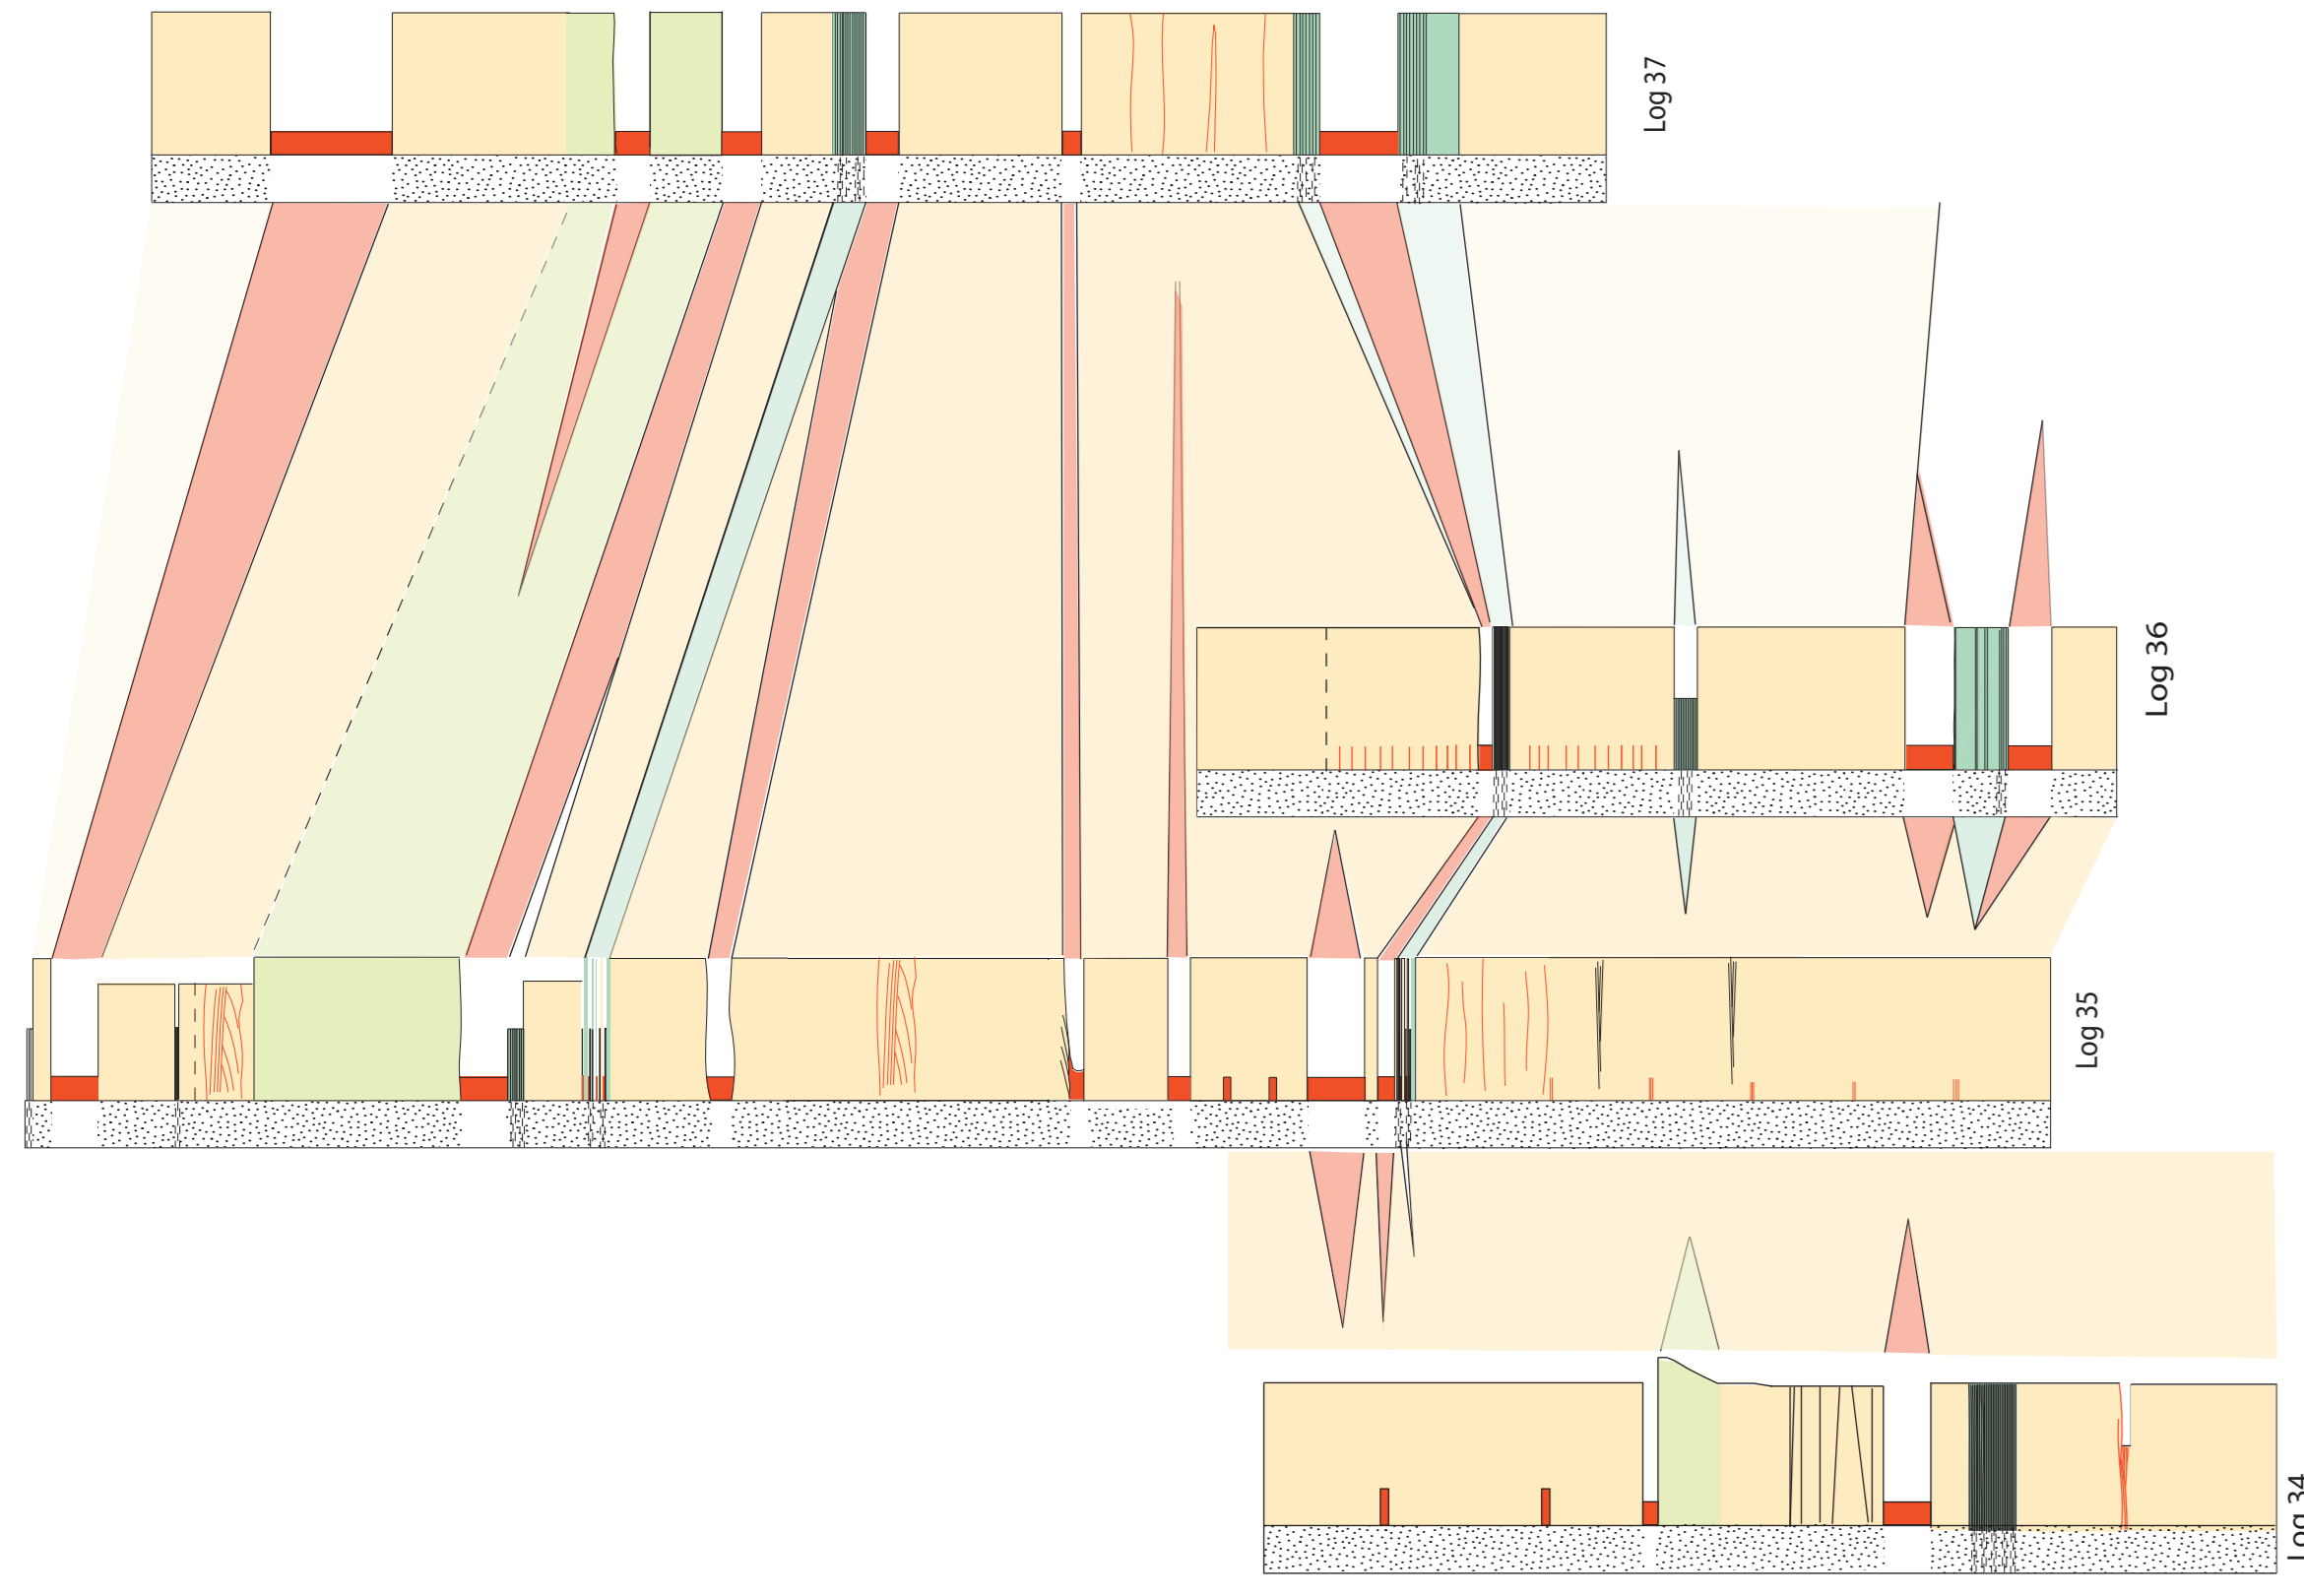

Scale for sedimentary logs

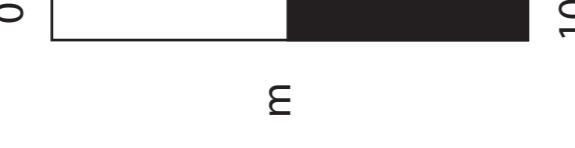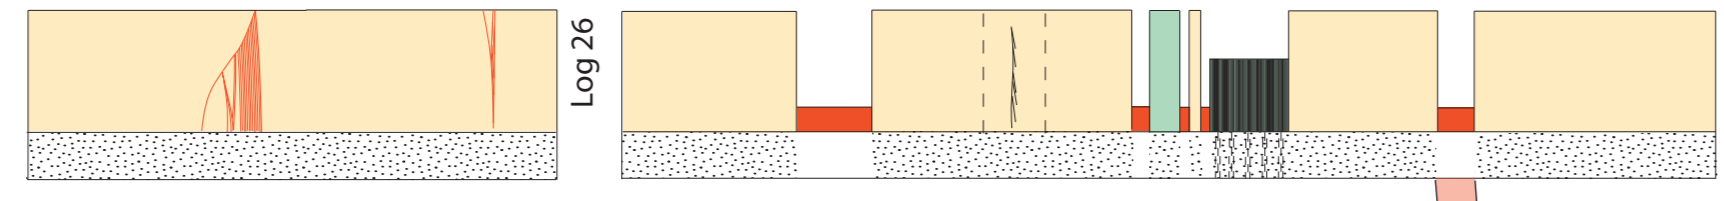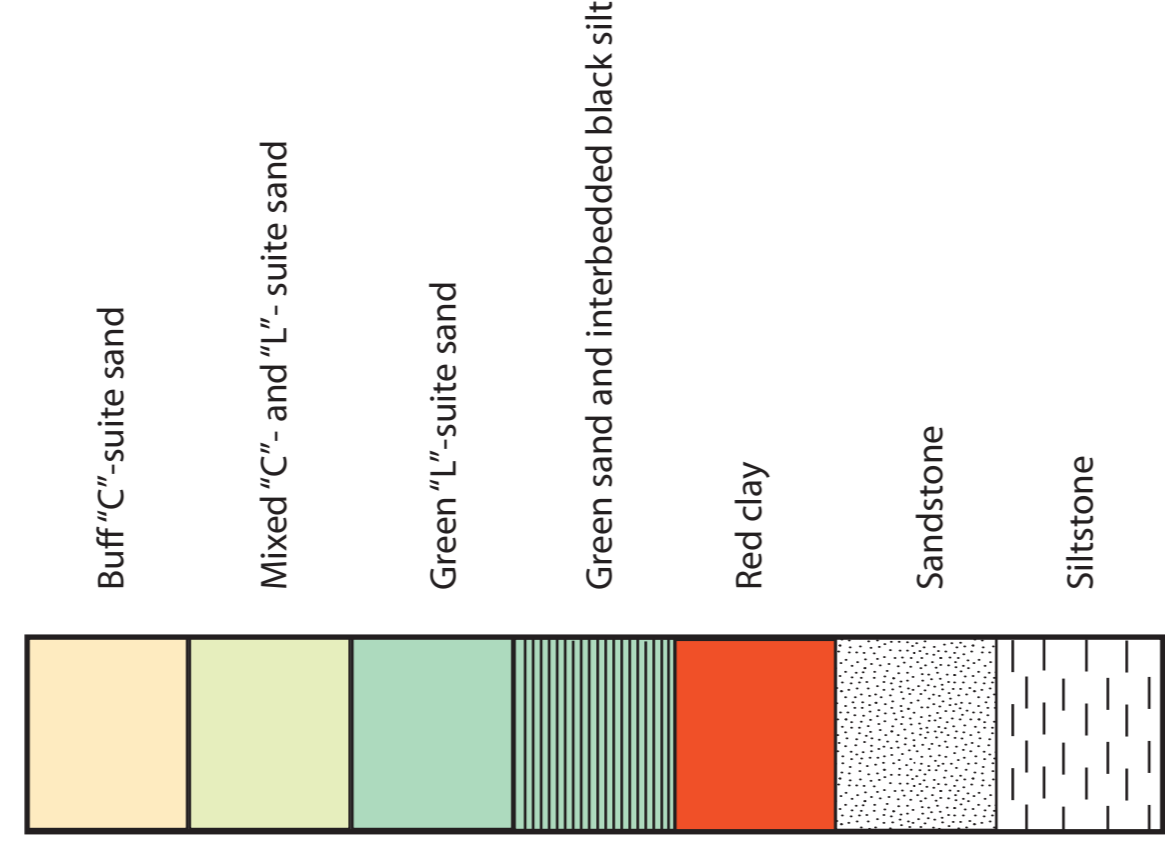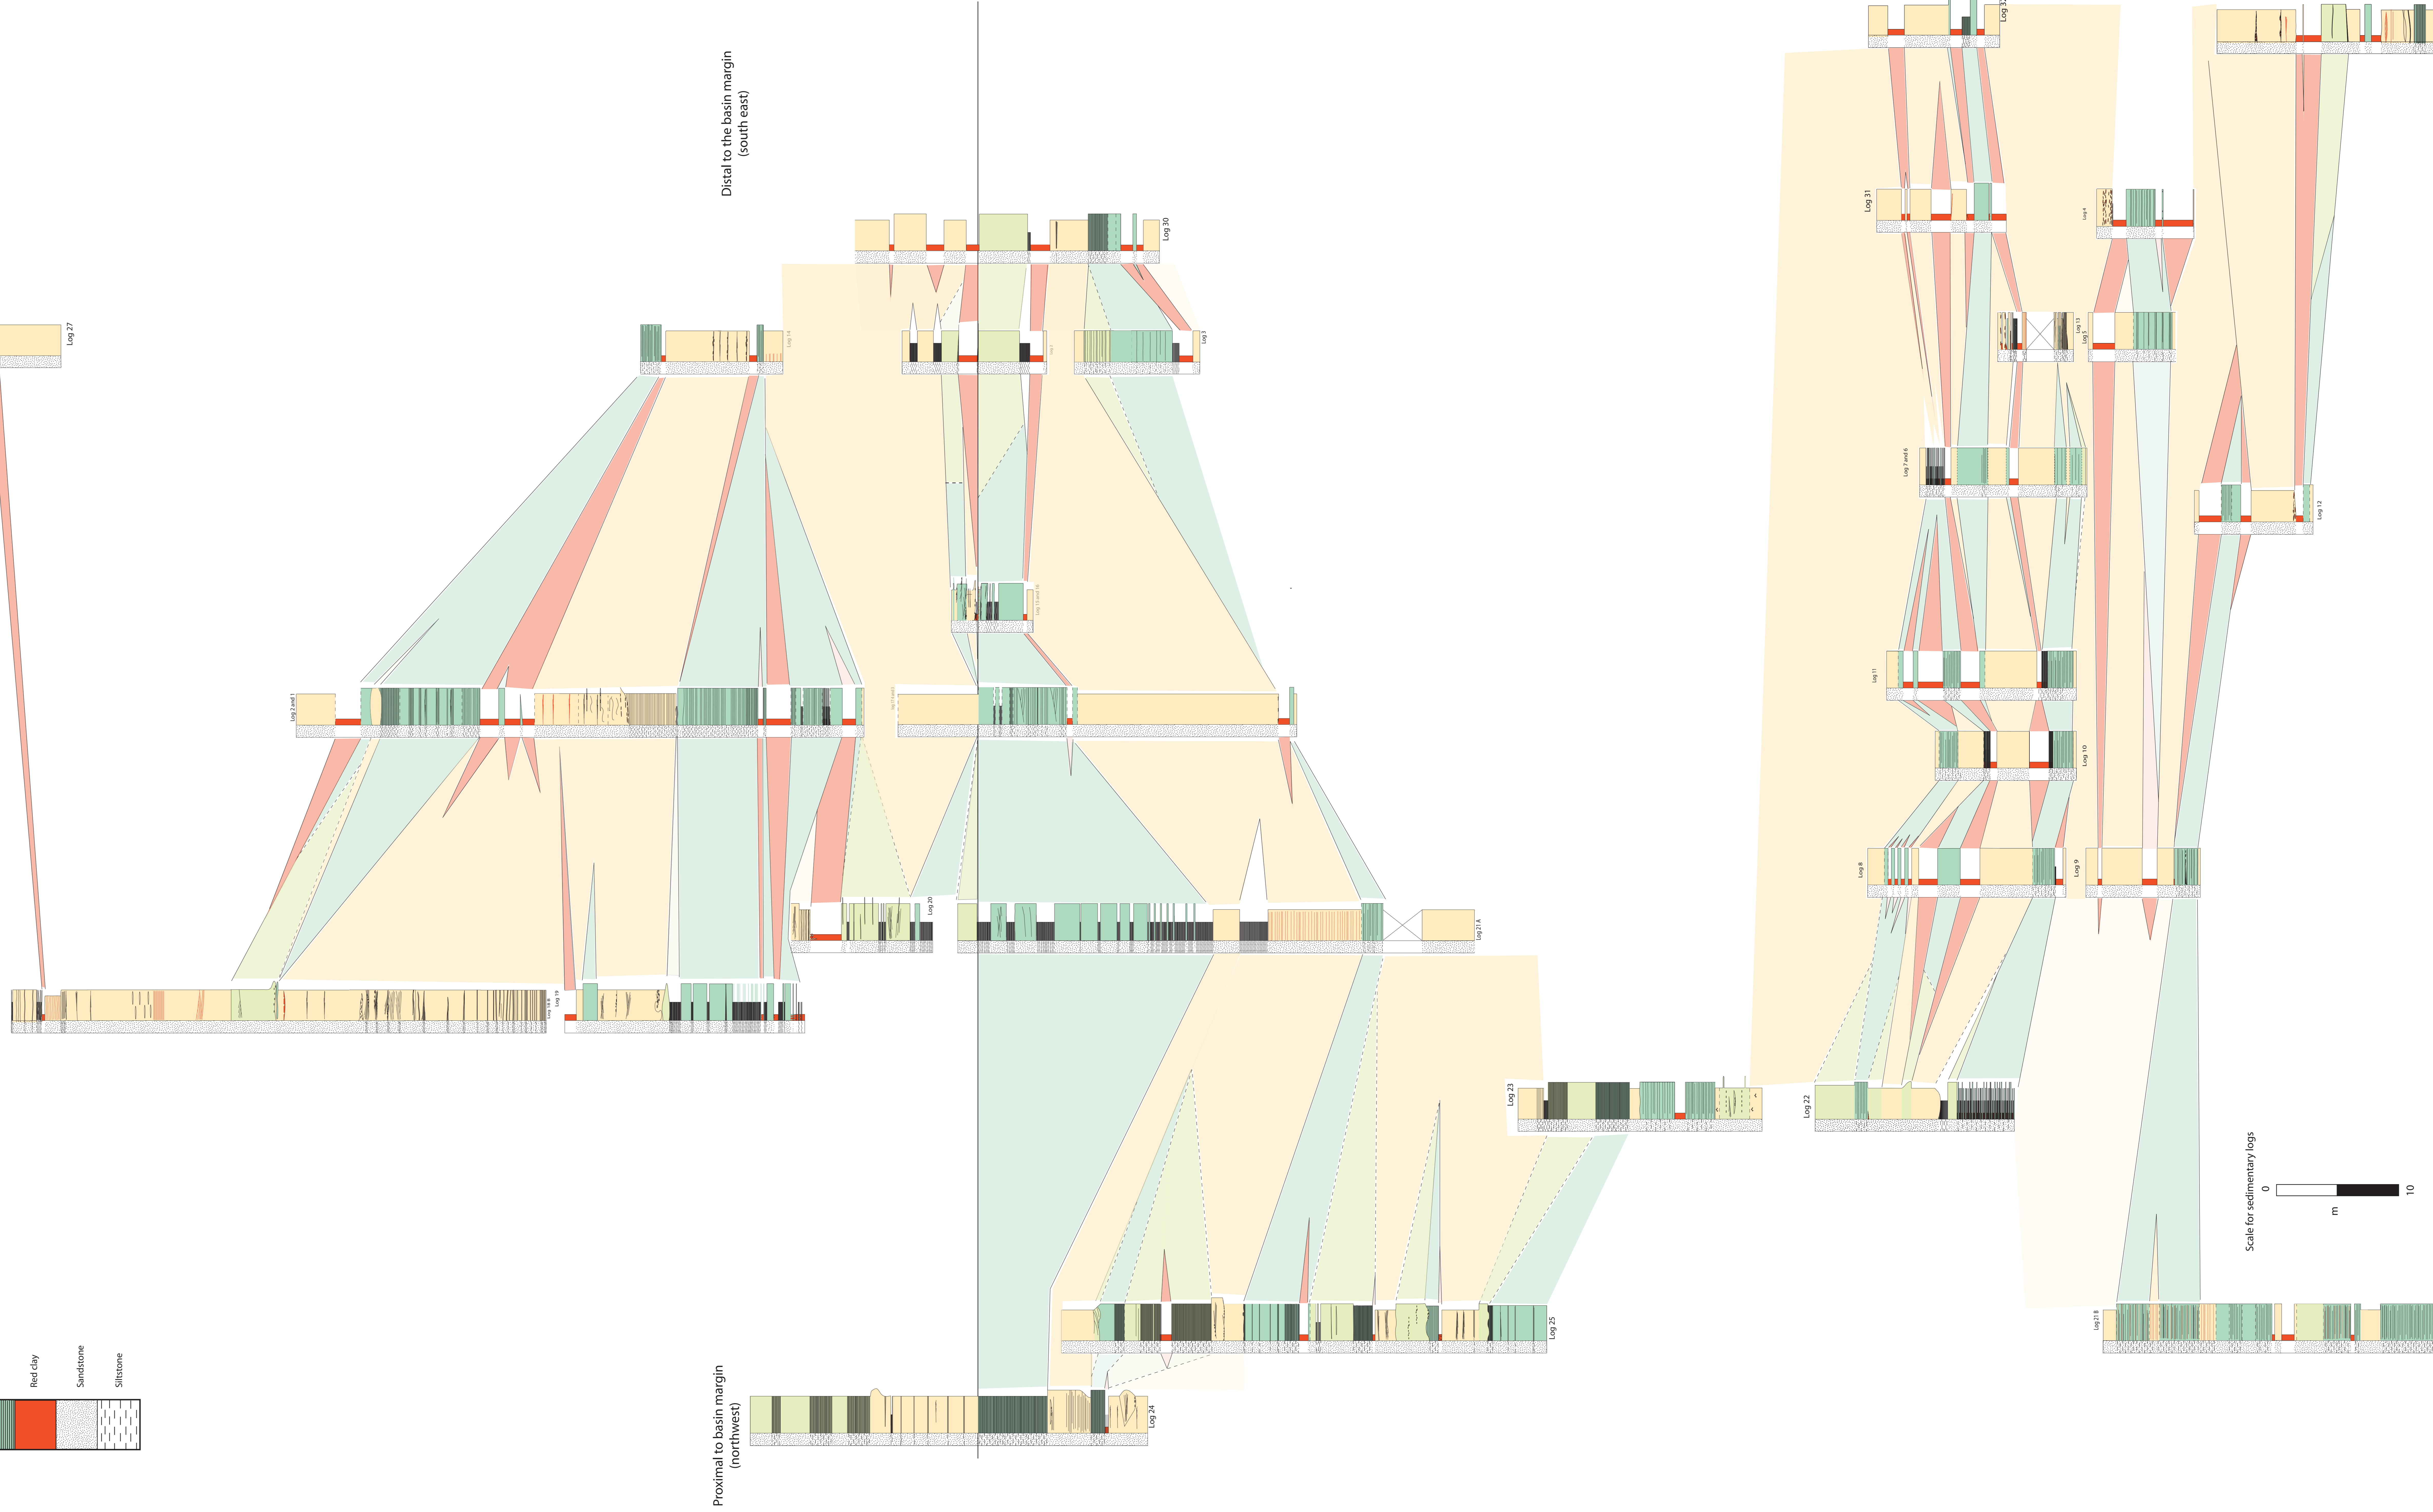

Endsheet 2. Sedimentary logs spanning the Olla Formation and, where distal to the basin margin, some of the half sediment is the interfingering C-suite. Arroyo Dulce Formation.
